# Supplementary material for: The second virial coefficient of the dipolar two center Lennard-Jones modelElectronic supplementary information (ESI) available: computer programs and ancillary data. See http://www.rsc.org/suppdata/cp/b2/b200781a/
Source: Royal Society of Chemistry journal article supplement (doi:10.1039/b200781a), 2002-05-17
Supplement: data.dat [file data.dat]

#  Angle (degrees)  L*           mu*^2               T*       B2/(sigma)^3
   0.00000      1.00000         0.00000         0.42500      -356.93376
   0.00000      1.00000         0.00000         0.45000      -270.50694
   0.00000      1.00000         0.00000         0.47500      -212.66563
   0.00000      1.00000         0.00000         0.50000      -172.21435
   0.00000      1.00000         0.00000         0.52500      -142.86310
   0.00000      1.00000         0.00000         0.55000      -120.89253
   0.00000      1.00000         0.00000         0.57500      -104.00464
   0.00000      1.00000         0.00000         0.60000       -90.72463
   0.00000      1.00000         0.00000         0.62500       -80.07411
   0.00000      1.00000         0.00000         0.65000       -71.38485
   0.00000      1.00000         0.00000         0.67500       -64.18859
   0.00000      1.00000         0.00000         0.70000       -58.14957
   0.00000      1.00000         0.00000         0.72500       -53.02212
   0.00000      1.00000         0.00000         0.75000       -48.62315
   0.00000      1.00000         0.00000         0.77500       -44.81392
   0.00000      1.00000         0.00000         0.80000       -41.48775
   0.00000      1.00000         0.00000         0.82500       -38.56147
   0.00000      1.00000         0.00000         0.85000       -35.96944
   0.00000      1.00000         0.00000         0.87500       -33.65925
   0.00000      1.00000         0.00000         0.90000       -31.58864
   0.00000      1.00000         0.00000         0.92500       -29.72320
   0.00000      1.00000         0.00000         0.95000       -28.03465
   0.00000      1.00000         0.00000         0.97500       -26.49958
   0.00000      1.00000         0.00000         1.00000       -25.09845
   0.00000      1.00000         0.00000         1.02500       -23.81483
   0.00000      1.00000         0.00000         1.05000       -22.63484
   0.00000      1.00000         0.00000         1.07500       -21.54665
   0.00000      1.00000         0.00000         1.10000       -20.54015
   0.00000      1.00000         0.00000         1.12500       -19.60663
   0.00000      1.00000         0.00000         1.15000       -18.73856
   0.00000      1.00000         0.00000         1.17500       -17.92940
   0.00000      1.00000         0.00000         1.20000       -17.17344
   0.00000      1.00000         0.00000         1.22500       -16.46568
   0.00000      1.00000         0.00000         1.25000       -15.80171
   0.00000      1.00000         0.00000         1.27500       -15.17764
   0.00000      1.00000         0.00000         1.30000       -14.59003
   0.00000      1.00000         0.00000         1.32500       -14.03582
   0.00000      1.00000         0.00000         1.35000       -13.51227
   0.00000      1.00000         0.00000         1.37500       -13.01693
   0.00000      1.00000         0.00000         1.40000       -12.54762
   0.00000      1.00000         0.00000         1.42500       -12.10235
   0.00000      1.00000         0.00000         1.45000       -11.67935
   0.00000      1.00000         0.00000         1.47500       -11.27700
   0.00000      1.00000         0.00000         1.50000       -10.89385
   0.00000      1.00000         0.00000         1.52500       -10.52856
   0.00000      1.00000         0.00000         1.55000       -10.17994
   0.00000      1.00000         0.00000         1.57500        -9.84687
   0.00000      1.00000         0.00000         1.60000        -9.52835
   0.00000      1.00000         0.00000         1.62500        -9.22346
   0.00000      1.00000         0.00000         1.65000        -8.93135
   0.00000      1.00000         0.00000         1.67500        -8.65124
   0.00000      1.00000         0.00000         1.70000        -8.38242
   0.00000      1.00000         0.00000         1.72500        -8.12422
   0.00000      1.00000         0.00000         1.75000        -7.87603
   0.00000      1.00000         0.00000         1.77500        -7.63729
   0.00000      1.00000         0.00000         1.80000        -7.40747
   0.00000      1.00000         0.00000         1.82500        -7.18609
   0.00000      1.00000         0.00000         1.85000        -6.97270
   0.00000      1.00000         0.00000         1.87500        -6.76688
   0.00000      1.00000         0.00000         1.90000        -6.56823
   0.00000      1.00000         0.00000         1.92500        -6.37640
   0.00000      1.00000         0.00000         1.95000        -6.19104
   0.00000      1.00000         0.00000         1.97500        -6.01183
   0.00000      1.00000         0.00000         2.00000        -5.83848
   0.00000      1.00000         0.00000         2.02500        -5.67070
   0.00000      1.00000         0.00000         2.05000        -5.50824
   0.00000      1.00000         0.00000         2.07500        -5.35085
   0.00000      1.00000         0.00000         2.10000        -5.19830
   0.00000      1.00000         0.00000         2.12500        -5.05037
   0.00000      1.00000         0.00000         2.15000        -4.90686
   0.00000      1.00000         0.00000         2.17500        -4.76757
   0.00000      1.00000         0.00000         2.20000        -4.63233
   0.00000      1.00000         0.00000         2.22500        -4.50096
   0.00000      1.00000         0.00000         2.25000        -4.37331
   0.00000      1.00000         0.00000         2.27500        -4.24921
   0.00000      1.00000         0.00000         2.30000        -4.12853
   0.00000      1.00000         0.00000         2.32500        -4.01112
   0.00000      1.00000         0.00000         2.35000        -3.89686
   0.00000      1.00000         0.00000         2.37500        -3.78563
   0.00000      1.00000         0.00000         2.40000        -3.67730
   0.00000      1.00000         0.00000         2.42500        -3.57177
   0.00000      1.00000         0.00000         2.45000        -3.46893
   0.00000      1.00000         0.00000         2.47500        -3.36869
   0.00000      1.00000         0.00000         2.50000        -3.27094
   0.00000      1.00000         0.00000         2.52500        -3.17559
   0.00000      1.00000         0.00000         2.55000        -3.08257
   0.00000      1.00000         0.00000         2.57500        -2.99178
   0.00000      1.00000         0.00000         2.60000        -2.90315
   0.00000      1.00000         0.00000         2.62500        -2.81661
   0.00000      1.00000         0.00000         2.65000        -2.73208
   0.00000      1.00000         0.00000         2.67500        -2.64950
   0.00000      1.00000         0.00000         2.70000        -2.56879
   0.00000      1.00000         0.00000         2.72500        -2.48991
   0.00000      1.00000         0.00000         2.75000        -2.41278
   0.00000      1.00000         0.00000         2.77500        -2.33735
   0.00000      1.00000         0.00000         2.80000        -2.26357
   0.00000      1.00000         0.00000         2.82500        -2.19138
   0.00000      1.00000         0.00000         2.85000        -2.12074
   0.00000      1.00000         0.00000         2.87500        -2.05159
   0.00000      1.00000         0.00000         2.90000        -1.98389
   0.00000      1.00000         0.00000         2.92500        -1.91760
   0.00000      1.00000         0.00000         2.95000        -1.85268
   0.00000      1.00000         0.00000         2.97500        -1.78907
   0.00000      1.00000         0.00000         3.00000        -1.72675
   0.00000      1.00000         0.00000         3.02500        -1.66568
   0.00000      1.00000         0.00000         3.05000        -1.60581
   0.00000      1.00000         0.00000         3.07500        -1.54712
   0.00000      1.00000         0.00000         3.10000        -1.48957
   0.00000      1.00000         0.00000         3.12500        -1.43313
   0.00000      1.00000         0.00000         3.15000        -1.37777
   0.00000      1.00000         0.00000         3.17500        -1.32346
   0.00000      1.00000         0.00000         3.20000        -1.27017
   0.00000      1.00000         0.00000         3.22500        -1.21787
   0.00000      1.00000         0.00000         3.25000        -1.16654
   0.00000      1.00000         0.00000         3.27500        -1.11614
   0.00000      1.00000         0.00000         3.30000        -1.06666
   0.00000      1.00000         0.00000         3.32500        -1.01807
   0.00000      1.00000         0.00000         3.35000        -0.97035
   0.00000      1.00000         0.00000         3.37500        -0.92347
   0.00000      1.00000         0.00000         3.40000        -0.87741
   0.00000      1.00000         0.00000         3.42500        -0.83216
   0.00000      1.00000         0.00000         3.45000        -0.78769
   0.00000      1.00000         0.00000         3.47500        -0.74398
   0.00000      1.00000         0.00000         3.50000        -0.70102
   0.00000      1.00000         0.00000         3.52500        -0.65878
   0.00000      1.00000         0.00000         3.55000        -0.61725
   0.00000      1.00000         0.00000         3.57500        -0.57641
   0.00000      1.00000         0.00000         3.60000        -0.53624
   0.00000      1.00000         0.00000         3.62500        -0.49673
   0.00000      1.00000         0.00000         3.65000        -0.45787
   0.00000      1.00000         0.00000         3.67500        -0.41963
   0.00000      1.00000         0.00000         3.70000        -0.38200
   0.00000      1.00000         0.00000         3.72500        -0.34497
   0.00000      1.00000         0.00000         3.75000        -0.30853
   0.00000      1.00000         0.00000         3.77500        -0.27266
   0.00000      1.00000         0.00000         3.80000        -0.23735
   0.00000      1.00000         0.00000         3.82500        -0.20258
   0.00000      1.00000         0.00000         3.85000        -0.16835
   0.00000      1.00000         0.00000         3.87500        -0.13464
   0.00000      1.00000         0.00000         3.90000        -0.10144
   0.00000      1.00000         0.00000         3.92500        -0.06874
   0.00000      1.00000         0.00000         3.95000        -0.03652
   0.00000      1.00000         0.00000         3.97500        -0.00479
   0.00000      1.00000         0.00000         4.00000         0.02648
   0.00000      1.00000         0.00000         4.02500         0.05728
   0.00000      1.00000         0.00000         4.05000         0.08764
   0.00000      1.00000         0.00000         4.07500         0.11756
   0.00000      1.00000         0.00000         4.10000         0.14705
   0.00000      1.00000         0.00000         4.12500         0.17612
   0.00000      1.00000         0.00000         4.15000         0.20478
   0.00000      1.00000         0.00000         4.17500         0.23303
   0.00000      1.00000         0.00000         4.20000         0.26089
   0.00000      1.00000         0.00000         4.22500         0.28836
   0.00000      1.00000         0.00000         4.25000         0.31545
   0.00000      1.00000         0.00000         4.27500         0.34216
   0.00000      1.00000         0.00000         4.30000         0.36852
   0.00000      1.00000         0.00000         4.32500         0.39451
   0.00000      1.00000         0.00000         4.35000         0.42015
   0.00000      1.00000         0.00000         4.37500         0.44545
   0.00000      1.00000         0.00000         4.40000         0.47041
   0.00000      1.00000         0.00000         4.42500         0.49504
   0.00000      1.00000         0.00000         4.45000         0.51934
   0.00000      1.00000         0.00000         4.47500         0.54333
   0.00000      1.00000         1.00000         0.47500      -242.35380
   0.00000      1.00000         1.00000         0.50000      -193.24411
   0.00000      1.00000         1.00000         0.52500      -158.27700
   0.00000      1.00000         1.00000         0.55000      -132.52466
   0.00000      1.00000         1.00000         0.57500      -113.00587
   0.00000      1.00000         1.00000         0.60000       -97.84289
   0.00000      1.00000         1.00000         0.62500       -85.81070
   0.00000      1.00000         1.00000         0.65000       -76.08507
   0.00000      1.00000         1.00000         0.67500       -68.09611
   0.00000      1.00000         1.00000         0.70000       -61.44015
   0.00000      1.00000         1.00000         0.72500       -55.82501
   0.00000      1.00000         1.00000         0.75000       -51.03508
   0.00000      1.00000         1.00000         0.77500       -46.90848
   0.00000      1.00000         1.00000         0.80000       -43.32170
   0.00000      1.00000         1.00000         0.82500       -40.17918
   0.00000      1.00000         1.00000         0.85000       -37.40602
   0.00000      1.00000         1.00000         0.87500       -34.94281
   0.00000      1.00000         1.00000         0.90000       -32.74188
   0.00000      1.00000         1.00000         0.92500       -30.76463
   0.00000      1.00000         1.00000         0.95000       -28.97953
   0.00000      1.00000         1.00000         0.97500       -27.36055
   0.00000      1.00000         1.00000         1.00000       -25.88608
   0.00000      1.00000         1.00000         1.02500       -24.53801
   0.00000      1.00000         1.00000         1.05000       -23.30111
   0.00000      1.00000         1.00000         1.07500       -22.16243
   0.00000      1.00000         1.00000         1.10000       -21.11094
   0.00000      1.00000         1.00000         1.12500       -20.13717
   0.00000      1.00000         1.00000         1.15000       -19.23296
   0.00000      1.00000         1.00000         1.17500       -18.39122
   0.00000      1.00000         1.00000         1.20000       -17.60580
   0.00000      1.00000         1.00000         1.22500       -16.87131
   0.00000      1.00000         1.00000         1.25000       -16.18303
   0.00000      1.00000         1.00000         1.27500       -15.53678
   0.00000      1.00000         1.00000         1.30000       -14.92888
   0.00000      1.00000         1.00000         1.32500       -14.35605
   0.00000      1.00000         1.00000         1.35000       -13.81539
   0.00000      1.00000         1.00000         1.37500       -13.30430
   0.00000      1.00000         1.00000         1.40000       -12.82043
   0.00000      1.00000         1.00000         1.42500       -12.36169
   0.00000      1.00000         1.00000         1.45000       -11.92621
   0.00000      1.00000         1.00000         1.47500       -11.51226
   0.00000      1.00000         1.00000         1.50000       -11.11832
   0.00000      1.00000         1.00000         1.52500       -10.74298
   0.00000      1.00000         1.00000         1.55000       -10.38497
   0.00000      1.00000         1.00000         1.57500       -10.04313
   0.00000      1.00000         1.00000         1.60000        -9.71640
   0.00000      1.00000         1.00000         1.62500        -9.40380
   0.00000      1.00000         1.00000         1.65000        -9.10446
   0.00000      1.00000         1.00000         1.67500        -8.81755
   0.00000      1.00000         1.00000         1.70000        -8.54232
   0.00000      1.00000         1.00000         1.72500        -8.27809
   0.00000      1.00000         1.00000         1.75000        -8.02421
   0.00000      1.00000         1.00000         1.77500        -7.78009
   0.00000      1.00000         1.00000         1.80000        -7.54519
   0.00000      1.00000         1.00000         1.82500        -7.31900
   0.00000      1.00000         1.00000         1.85000        -7.10104
   0.00000      1.00000         1.00000         1.87500        -6.89090
   0.00000      1.00000         1.00000         1.90000        -6.68814
   0.00000      1.00000         1.00000         1.92500        -6.49241
   0.00000      1.00000         1.00000         1.95000        -6.30333
   0.00000      1.00000         1.00000         1.97500        -6.12059
   0.00000      1.00000         1.00000         2.00000        -5.94387
   0.00000      1.00000         1.00000         2.02500        -5.77289
   0.00000      1.00000         1.00000         2.05000        -5.60736
   0.00000      1.00000         1.00000         2.07500        -5.44705
   0.00000      1.00000         1.00000         2.10000        -5.29171
   0.00000      1.00000         1.00000         2.12500        -5.14111
   0.00000      1.00000         1.00000         2.15000        -4.99504
   0.00000      1.00000         1.00000         2.17500        -4.85331
   0.00000      1.00000         1.00000         2.20000        -4.71572
   0.00000      1.00000         1.00000         2.22500        -4.58211
   0.00000      1.00000         1.00000         2.25000        -4.45230
   0.00000      1.00000         1.00000         2.27500        -4.32613
   0.00000      1.00000         1.00000         2.30000        -4.20346
   0.00000      1.00000         1.00000         2.32500        -4.08414
   0.00000      1.00000         1.00000         2.35000        -3.96805
   0.00000      1.00000         1.00000         2.37500        -3.85505
   0.00000      1.00000         1.00000         2.40000        -3.74502
   0.00000      1.00000         1.00000         2.42500        -3.63785
   0.00000      1.00000         1.00000         2.45000        -3.53344
   0.00000      1.00000         1.00000         2.47500        -3.43167
   0.00000      1.00000         1.00000         2.50000        -3.33246
   0.00000      1.00000         1.00000         2.52500        -3.23570
   0.00000      1.00000         1.00000         2.55000        -3.14132
   0.00000      1.00000         1.00000         2.57500        -3.04921
   0.00000      1.00000         1.00000         2.60000        -2.95931
   0.00000      1.00000         1.00000         2.62500        -2.87154
   0.00000      1.00000         1.00000         2.65000        -2.78582
   0.00000      1.00000         1.00000         2.67500        -2.70209
   0.00000      1.00000         1.00000         2.70000        -2.62027
   0.00000      1.00000         1.00000         2.72500        -2.54031
   0.00000      1.00000         1.00000         2.75000        -2.46214
   0.00000      1.00000         1.00000         2.77500        -2.38570
   0.00000      1.00000         1.00000         2.80000        -2.31094
   0.00000      1.00000         1.00000         2.82500        -2.23781
   0.00000      1.00000         1.00000         2.85000        -2.16625
   0.00000      1.00000         1.00000         2.87500        -2.09621
   0.00000      1.00000         1.00000         2.90000        -2.02765
   0.00000      1.00000         1.00000         2.92500        -1.96052
   0.00000      1.00000         1.00000         2.95000        -1.89478
   0.00000      1.00000         1.00000         2.97500        -1.83038
   0.00000      1.00000         1.00000         3.00000        -1.76730
   0.00000      1.00000         1.00000         3.02500        -1.70547
   0.00000      1.00000         1.00000         3.05000        -1.64488
   0.00000      1.00000         1.00000         3.07500        -1.58549
   0.00000      1.00000         1.00000         3.10000        -1.52726
   0.00000      1.00000         1.00000         3.12500        -1.47015
   0.00000      1.00000         1.00000         3.15000        -1.41414
   0.00000      1.00000         1.00000         3.17500        -1.35920
   0.00000      1.00000         1.00000         3.20000        -1.30529
   0.00000      1.00000         1.00000         3.22500        -1.25239
   0.00000      1.00000         1.00000         3.25000        -1.20048
   0.00000      1.00000         1.00000         3.27500        -1.14951
   0.00000      1.00000         1.00000         3.30000        -1.09948
   0.00000      1.00000         1.00000         3.32500        -1.05035
   0.00000      1.00000         1.00000         3.35000        -1.00210
   0.00000      1.00000         1.00000         3.37500        -0.95471
   0.00000      1.00000         1.00000         3.40000        -0.90816
   0.00000      1.00000         1.00000         3.42500        -0.86241
   0.00000      1.00000         1.00000         3.45000        -0.81747
   0.00000      1.00000         1.00000         3.47500        -0.77330
   0.00000      1.00000         1.00000         3.50000        -0.72988
   0.00000      1.00000         1.00000         3.52500        -0.68720
   0.00000      1.00000         1.00000         3.55000        -0.64524
   0.00000      1.00000         1.00000         3.57500        -0.60397
   0.00000      1.00000         1.00000         3.60000        -0.56339
   0.00000      1.00000         1.00000         3.62500        -0.52348
   0.00000      1.00000         1.00000         3.65000        -0.48422
   0.00000      1.00000         1.00000         3.67500        -0.44560
   0.00000      1.00000         1.00000         3.70000        -0.40760
   0.00000      1.00000         1.00000         3.72500        -0.37020
   0.00000      1.00000         1.00000         3.75000        -0.33340
   0.00000      1.00000         1.00000         3.77500        -0.29718
   0.00000      1.00000         1.00000         3.80000        -0.26152
   0.00000      1.00000         1.00000         3.82500        -0.22642
   0.00000      1.00000         1.00000         3.85000        -0.19185
   0.00000      1.00000         1.00000         3.87500        -0.15782
   0.00000      1.00000         1.00000         3.90000        -0.12431
   0.00000      1.00000         1.00000         3.92500        -0.09130
   0.00000      1.00000         1.00000         3.95000        -0.05878
   0.00000      1.00000         1.00000         3.97500        -0.02675
   0.00000      1.00000         1.00000         4.00000         0.00480
   0.00000      1.00000         1.00000         4.02500         0.03590
   0.00000      1.00000         1.00000         4.05000         0.06653
   0.00000      1.00000         1.00000         4.07500         0.09673
   0.00000      1.00000         1.00000         4.10000         0.12649
   0.00000      1.00000         1.00000         4.12500         0.15582
   0.00000      1.00000         1.00000         4.15000         0.18473
   0.00000      1.00000         1.00000         4.17500         0.21324
   0.00000      1.00000         1.00000         4.20000         0.24134
   0.00000      1.00000         1.00000         4.22500         0.26905
   0.00000      1.00000         1.00000         4.25000         0.29638
   0.00000      1.00000         1.00000         4.27500         0.32333
   0.00000      1.00000         1.00000         4.30000         0.34991
   0.00000      1.00000         1.00000         4.32500         0.37613
   0.00000      1.00000         1.00000         4.35000         0.40199
   0.00000      1.00000         1.00000         4.37500         0.42751
   0.00000      1.00000         1.00000         4.40000         0.45268
   0.00000      1.00000         1.00000         4.42500         0.47752
   0.00000      1.00000         1.00000         4.45000         0.50202
   0.00000      1.00000         1.00000         4.47500         0.52621
   0.00000      1.00000         1.00000         4.50000         0.55008
   0.00000      1.00000         1.00000         4.52500         0.57364
   0.00000      1.00000         1.00000         4.55000         0.59689
   0.00000      1.00000         1.00000         4.57500         0.61985
   0.00000      1.00000         1.00000         4.60000         0.64251
   0.00000      1.00000         2.00000         0.52500      -216.61331
   0.00000      1.00000         2.00000         0.55000      -175.46712
   0.00000      1.00000         2.00000         0.57500      -145.52760
   0.00000      1.00000         2.00000         0.60000      -123.08426
   0.00000      1.00000         2.00000         0.62500      -105.82311
   0.00000      1.00000         2.00000         0.65000       -92.24927
   0.00000      1.00000         2.00000         0.67500       -81.36653
   0.00000      1.00000         2.00000         0.70000       -72.49236
   0.00000      1.00000         2.00000         0.72500       -65.14750
   0.00000      1.00000         2.00000         0.75000       -58.98787
   0.00000      1.00000         2.00000         0.77500       -53.76156
   0.00000      1.00000         2.00000         0.80000       -49.28075
   0.00000      1.00000         2.00000         0.82500       -45.40313
   0.00000      1.00000         2.00000         0.85000       -42.01930
   0.00000      1.00000         2.00000         0.87500       -39.04398
   0.00000      1.00000         2.00000         0.90000       -36.40990
   0.00000      1.00000         2.00000         0.92500       -34.06341
   0.00000      1.00000         2.00000         0.95000       -31.96122
   0.00000      1.00000         2.00000         0.97500       -30.06814
   0.00000      1.00000         2.00000         1.00000       -28.35525
   0.00000      1.00000         2.00000         1.02500       -26.79861
   0.00000      1.00000         2.00000         1.05000       -25.37828
   0.00000      1.00000         2.00000         1.07500       -24.07749
   0.00000      1.00000         2.00000         1.10000       -22.88206
   0.00000      1.00000         2.00000         1.12500       -21.77994
   0.00000      1.00000         2.00000         1.15000       -20.76081
   0.00000      1.00000         2.00000         1.17500       -19.81580
   0.00000      1.00000         2.00000         1.20000       -18.93724
   0.00000      1.00000         2.00000         1.22500       -18.11848
   0.00000      1.00000         2.00000         1.25000       -17.35370
   0.00000      1.00000         2.00000         1.27500       -16.63781
   0.00000      1.00000         2.00000         1.30000       -15.96633
   0.00000      1.00000         2.00000         1.32500       -15.33531
   0.00000      1.00000         2.00000         1.35000       -14.74125
   0.00000      1.00000         2.00000         1.37500       -14.18104
   0.00000      1.00000         2.00000         1.40000       -13.65189
   0.00000      1.00000         2.00000         1.42500       -13.15132
   0.00000      1.00000         2.00000         1.45000       -12.67712
   0.00000      1.00000         2.00000         1.47500       -12.22726
   0.00000      1.00000         2.00000         1.50000       -11.79995
   0.00000      1.00000         2.00000         1.52500       -11.39355
   0.00000      1.00000         2.00000         1.55000       -11.00657
   0.00000      1.00000         2.00000         1.57500       -10.63768
   0.00000      1.00000         2.00000         1.60000       -10.28565
   0.00000      1.00000         2.00000         1.62500        -9.94936
   0.00000      1.00000         2.00000         1.65000        -9.62779
   0.00000      1.00000         2.00000         1.67500        -9.32000
   0.00000      1.00000         2.00000         1.70000        -9.02514
   0.00000      1.00000         2.00000         1.72500        -8.74241
   0.00000      1.00000         2.00000         1.75000        -8.47110
   0.00000      1.00000         2.00000         1.77500        -8.21052
   0.00000      1.00000         2.00000         1.80000        -7.96007
   0.00000      1.00000         2.00000         1.82500        -7.71917
   0.00000      1.00000         2.00000         1.85000        -7.48729
   0.00000      1.00000         2.00000         1.87500        -7.26394
   0.00000      1.00000         2.00000         1.90000        -7.04867
   0.00000      1.00000         2.00000         1.92500        -6.84104
   0.00000      1.00000         2.00000         1.95000        -6.64066
   0.00000      1.00000         2.00000         1.97500        -6.44716
   0.00000      1.00000         2.00000         2.00000        -6.26020
   0.00000      1.00000         2.00000         2.02500        -6.07946
   0.00000      1.00000         2.00000         2.05000        -5.90463
   0.00000      1.00000         2.00000         2.07500        -5.73544
   0.00000      1.00000         2.00000         2.10000        -5.57161
   0.00000      1.00000         2.00000         2.12500        -5.41290
   0.00000      1.00000         2.00000         2.15000        -5.25909
   0.00000      1.00000         2.00000         2.17500        -5.10993
   0.00000      1.00000         2.00000         2.20000        -4.96524
   0.00000      1.00000         2.00000         2.22500        -4.82482
   0.00000      1.00000         2.00000         2.25000        -4.68848
   0.00000      1.00000         2.00000         2.27500        -4.55605
   0.00000      1.00000         2.00000         2.30000        -4.42737
   0.00000      1.00000         2.00000         2.32500        -4.30228
   0.00000      1.00000         2.00000         2.35000        -4.18063
   0.00000      1.00000         2.00000         2.37500        -4.06229
   0.00000      1.00000         2.00000         2.40000        -3.94713
   0.00000      1.00000         2.00000         2.42500        -3.83502
   0.00000      1.00000         2.00000         2.45000        -3.72585
   0.00000      1.00000         2.00000         2.47500        -3.61950
   0.00000      1.00000         2.00000         2.50000        -3.51586
   0.00000      1.00000         2.00000         2.52500        -3.41484
   0.00000      1.00000         2.00000         2.55000        -3.31634
   0.00000      1.00000         2.00000         2.57500        -3.22027
   0.00000      1.00000         2.00000         2.60000        -3.12654
   0.00000      1.00000         2.00000         2.62500        -3.03506
   0.00000      1.00000         2.00000         2.65000        -2.94576
   0.00000      1.00000         2.00000         2.67500        -2.85857
   0.00000      1.00000         2.00000         2.70000        -2.77341
   0.00000      1.00000         2.00000         2.72500        -2.69020
   0.00000      1.00000         2.00000         2.75000        -2.60890
   0.00000      1.00000         2.00000         2.77500        -2.52943
   0.00000      1.00000         2.00000         2.80000        -2.45173
   0.00000      1.00000         2.00000         2.82500        -2.37574
   0.00000      1.00000         2.00000         2.85000        -2.30142
   0.00000      1.00000         2.00000         2.87500        -2.22870
   0.00000      1.00000         2.00000         2.90000        -2.15755
   0.00000      1.00000         2.00000         2.92500        -2.08790
   0.00000      1.00000         2.00000         2.95000        -2.01971
   0.00000      1.00000         2.00000         2.97500        -1.95294
   0.00000      1.00000         2.00000         3.00000        -1.88755
   0.00000      1.00000         2.00000         3.02500        -1.82349
   0.00000      1.00000         2.00000         3.05000        -1.76072
   0.00000      1.00000         2.00000         3.07500        -1.69921
   0.00000      1.00000         2.00000         3.10000        -1.63892
   0.00000      1.00000         2.00000         3.12500        -1.57981
   0.00000      1.00000         2.00000         3.15000        -1.52186
   0.00000      1.00000         2.00000         3.17500        -1.46502
   0.00000      1.00000         2.00000         3.20000        -1.40927
   0.00000      1.00000         2.00000         3.22500        -1.35458
   0.00000      1.00000         2.00000         3.25000        -1.30092
   0.00000      1.00000         2.00000         3.27500        -1.24825
   0.00000      1.00000         2.00000         3.30000        -1.19656
   0.00000      1.00000         2.00000         3.32500        -1.14582
   0.00000      1.00000         2.00000         3.35000        -1.09600
   0.00000      1.00000         2.00000         3.37500        -1.04707
   0.00000      1.00000         2.00000         3.40000        -0.99902
   0.00000      1.00000         2.00000         3.42500        -0.95182
   0.00000      1.00000         2.00000         3.45000        -0.90545
   0.00000      1.00000         2.00000         3.47500        -0.85989
   0.00000      1.00000         2.00000         3.50000        -0.81512
   0.00000      1.00000         2.00000         3.52500        -0.77111
   0.00000      1.00000         2.00000         3.55000        -0.72786
   0.00000      1.00000         2.00000         3.57500        -0.68533
   0.00000      1.00000         2.00000         3.60000        -0.64352
   0.00000      1.00000         2.00000         3.62500        -0.60241
   0.00000      1.00000         2.00000         3.65000        -0.56197
   0.00000      1.00000         2.00000         3.67500        -0.52220
   0.00000      1.00000         2.00000         3.70000        -0.48307
   0.00000      1.00000         2.00000         3.72500        -0.44458
   0.00000      1.00000         2.00000         3.75000        -0.40670
   0.00000      1.00000         2.00000         3.77500        -0.36943
   0.00000      1.00000         2.00000         3.80000        -0.33274
   0.00000      1.00000         2.00000         3.82500        -0.29664
   0.00000      1.00000         2.00000         3.85000        -0.26109
   0.00000      1.00000         2.00000         3.87500        -0.22609
   0.00000      1.00000         2.00000         3.90000        -0.19164
   0.00000      1.00000         2.00000         3.92500        -0.15770
   0.00000      1.00000         2.00000         3.95000        -0.12429
   0.00000      1.00000         2.00000         3.97500        -0.09137
   0.00000      1.00000         2.00000         4.00000        -0.05895
   0.00000      1.00000         2.00000         4.02500        -0.02701
   0.00000      1.00000         2.00000         4.05000         0.00446
   0.00000      1.00000         2.00000         4.07500         0.03547
   0.00000      1.00000         2.00000         4.10000         0.06602
   0.00000      1.00000         2.00000         4.12500         0.09614
   0.00000      1.00000         2.00000         4.15000         0.12582
   0.00000      1.00000         2.00000         4.17500         0.15507
   0.00000      1.00000         2.00000         4.20000         0.18391
   0.00000      1.00000         2.00000         4.22500         0.21235
   0.00000      1.00000         2.00000         4.25000         0.24038
   0.00000      1.00000         2.00000         4.27500         0.26803
   0.00000      1.00000         2.00000         4.30000         0.29529
   0.00000      1.00000         2.00000         4.32500         0.32218
   0.00000      1.00000         2.00000         4.35000         0.34870
   0.00000      1.00000         2.00000         4.37500         0.37485
   0.00000      1.00000         2.00000         4.40000         0.40066
   0.00000      1.00000         2.00000         4.42500         0.42612
   0.00000      1.00000         2.00000         4.45000         0.45124
   0.00000      1.00000         2.00000         4.47500         0.47602
   0.00000      1.00000         2.00000         4.50000         0.50048
   0.00000      1.00000         2.00000         4.52500         0.52461
   0.00000      1.00000         2.00000         4.55000         0.54843
   0.00000      1.00000         2.00000         4.57500         0.57195
   0.00000      1.00000         2.00000         4.60000         0.59515
   0.00000      1.00000         2.00000         4.62500         0.61806
   0.00000      1.00000         2.00000         4.65000         0.64068
   0.00000      1.00000         2.00000         4.67500         0.66301
   0.00000      1.00000         2.00000         4.70000         0.68506
   0.00000      1.00000         2.00000         4.72500         0.70684
   0.00000      1.00000         2.00000         4.75000         0.72834
   0.00000      1.00000         3.00000         0.62500      -151.04209
   0.00000      1.00000         3.00000         0.65000      -127.76505
   0.00000      1.00000         3.00000         0.67500      -109.81189
   0.00000      1.00000         3.00000         0.70000       -95.66975
   0.00000      1.00000         3.00000         0.72500       -84.32113
   0.00000      1.00000         3.00000         0.75000       -75.06397
   0.00000      1.00000         3.00000         0.77500       -67.40260
   0.00000      1.00000         3.00000         0.80000       -60.97973
   0.00000      1.00000         3.00000         0.82500       -55.53291
   0.00000      1.00000         3.00000         0.85000       -50.86606
   0.00000      1.00000         3.00000         0.87500       -46.83036
   0.00000      1.00000         3.00000         0.90000       -43.31127
   0.00000      1.00000         3.00000         0.92500       -40.21943
   0.00000      1.00000         3.00000         0.95000       -37.48435
   0.00000      1.00000         3.00000         0.97500       -35.04977
   0.00000      1.00000         3.00000         1.00000       -32.87032
   0.00000      1.00000         3.00000         1.02500       -30.90911
   0.00000      1.00000         3.00000         1.05000       -29.13584
   0.00000      1.00000         3.00000         1.07500       -27.52544
   0.00000      1.00000         3.00000         1.10000       -26.05702
   0.00000      1.00000         3.00000         1.12500       -24.71304
   0.00000      1.00000         3.00000         1.15000       -23.47866
   0.00000      1.00000         3.00000         1.17500       -22.34130
   0.00000      1.00000         3.00000         1.20000       -21.29017
   0.00000      1.00000         3.00000         1.22500       -20.31600
   0.00000      1.00000         3.00000         1.25000       -19.41081
   0.00000      1.00000         3.00000         1.27500       -18.56762
   0.00000      1.00000         3.00000         1.30000       -17.78040
   0.00000      1.00000         3.00000         1.32500       -17.04383
   0.00000      1.00000         3.00000         1.35000       -16.35326
   0.00000      1.00000         3.00000         1.37500       -15.70457
   0.00000      1.00000         3.00000         1.40000       -15.09411
   0.00000      1.00000         3.00000         1.42500       -14.51865
   0.00000      1.00000         3.00000         1.45000       -13.97530
   0.00000      1.00000         3.00000         1.47500       -13.46148
   0.00000      1.00000         3.00000         1.50000       -12.97488
   0.00000      1.00000         3.00000         1.52500       -12.51343
   0.00000      1.00000         3.00000         1.55000       -12.07523
   0.00000      1.00000         3.00000         1.57500       -11.65861
   0.00000      1.00000         3.00000         1.60000       -11.26202
   0.00000      1.00000         3.00000         1.62500       -10.88407
   0.00000      1.00000         3.00000         1.65000       -10.52349
   0.00000      1.00000         3.00000         1.67500       -10.17913
   0.00000      1.00000         3.00000         1.70000        -9.84993
   0.00000      1.00000         3.00000         1.72500        -9.53491
   0.00000      1.00000         3.00000         1.75000        -9.23320
   0.00000      1.00000         3.00000         1.77500        -8.94398
   0.00000      1.00000         3.00000         1.80000        -8.66649
   0.00000      1.00000         3.00000         1.82500        -8.40005
   0.00000      1.00000         3.00000         1.85000        -8.14401
   0.00000      1.00000         3.00000         1.87500        -7.89779
   0.00000      1.00000         3.00000         1.90000        -7.66084
   0.00000      1.00000         3.00000         1.92500        -7.43265
   0.00000      1.00000         3.00000         1.95000        -7.21275
   0.00000      1.00000         3.00000         1.97500        -7.00070
   0.00000      1.00000         3.00000         2.00000        -6.79609
   0.00000      1.00000         3.00000         2.02500        -6.59855
   0.00000      1.00000         3.00000         2.05000        -6.40771
   0.00000      1.00000         3.00000         2.07500        -6.22326
   0.00000      1.00000         3.00000         2.10000        -6.04486
   0.00000      1.00000         3.00000         2.12500        -5.87225
   0.00000      1.00000         3.00000         2.15000        -5.70513
   0.00000      1.00000         3.00000         2.17500        -5.54327
   0.00000      1.00000         3.00000         2.20000        -5.38641
   0.00000      1.00000         3.00000         2.22500        -5.23434
   0.00000      1.00000         3.00000         2.25000        -5.08683
   0.00000      1.00000         3.00000         2.27500        -4.94370
   0.00000      1.00000         3.00000         2.30000        -4.80475
   0.00000      1.00000         3.00000         2.32500        -4.66980
   0.00000      1.00000         3.00000         2.35000        -4.53868
   0.00000      1.00000         3.00000         2.37500        -4.41125
   0.00000      1.00000         3.00000         2.40000        -4.28733
   0.00000      1.00000         3.00000         2.42500        -4.16681
   0.00000      1.00000         3.00000         2.45000        -4.04953
   0.00000      1.00000         3.00000         2.47500        -3.93537
   0.00000      1.00000         3.00000         2.50000        -3.82422
   0.00000      1.00000         3.00000         2.52500        -3.71595
   0.00000      1.00000         3.00000         2.55000        -3.61046
   0.00000      1.00000         3.00000         2.57500        -3.50765
   0.00000      1.00000         3.00000         2.60000        -3.40740
   0.00000      1.00000         3.00000         2.62500        -3.30964
   0.00000      1.00000         3.00000         2.65000        -3.21427
   0.00000      1.00000         3.00000         2.67500        -3.12121
   0.00000      1.00000         3.00000         2.70000        -3.03037
   0.00000      1.00000         3.00000         2.72500        -2.94168
   0.00000      1.00000         3.00000         2.75000        -2.85506
   0.00000      1.00000         3.00000         2.77500        -2.77045
   0.00000      1.00000         3.00000         2.80000        -2.68777
   0.00000      1.00000         3.00000         2.82500        -2.60697
   0.00000      1.00000         3.00000         2.85000        -2.52797
   0.00000      1.00000         3.00000         2.87500        -2.45073
   0.00000      1.00000         3.00000         2.90000        -2.37518
   0.00000      1.00000         3.00000         2.92500        -2.30127
   0.00000      1.00000         3.00000         2.95000        -2.22895
   0.00000      1.00000         3.00000         2.97500        -2.15817
   0.00000      1.00000         3.00000         3.00000        -2.08888
   0.00000      1.00000         3.00000         3.02500        -2.02104
   0.00000      1.00000         3.00000         3.05000        -1.95460
   0.00000      1.00000         3.00000         3.07500        -1.88952
   0.00000      1.00000         3.00000         3.10000        -1.82576
   0.00000      1.00000         3.00000         3.12500        -1.76328
   0.00000      1.00000         3.00000         3.15000        -1.70205
   0.00000      1.00000         3.00000         3.17500        -1.64202
   0.00000      1.00000         3.00000         3.20000        -1.58316
   0.00000      1.00000         3.00000         3.22500        -1.52545
   0.00000      1.00000         3.00000         3.25000        -1.46884
   0.00000      1.00000         3.00000         3.27500        -1.41331
   0.00000      1.00000         3.00000         3.30000        -1.35883
   0.00000      1.00000         3.00000         3.32500        -1.30536
   0.00000      1.00000         3.00000         3.35000        -1.25289
   0.00000      1.00000         3.00000         3.37500        -1.20138
   0.00000      1.00000         3.00000         3.40000        -1.15081
   0.00000      1.00000         3.00000         3.42500        -1.10116
   0.00000      1.00000         3.00000         3.45000        -1.05239
   0.00000      1.00000         3.00000         3.47500        -1.00449
   0.00000      1.00000         3.00000         3.50000        -0.95744
   0.00000      1.00000         3.00000         3.52500        -0.91121
   0.00000      1.00000         3.00000         3.55000        -0.86578
   0.00000      1.00000         3.00000         3.57500        -0.82114
   0.00000      1.00000         3.00000         3.60000        -0.77726
   0.00000      1.00000         3.00000         3.62500        -0.73412
   0.00000      1.00000         3.00000         3.65000        -0.69171
   0.00000      1.00000         3.00000         3.67500        -0.65000
   0.00000      1.00000         3.00000         3.70000        -0.60899
   0.00000      1.00000         3.00000         3.72500        -0.56865
   0.00000      1.00000         3.00000         3.75000        -0.52897
   0.00000      1.00000         3.00000         3.77500        -0.48993
   0.00000      1.00000         3.00000         3.80000        -0.45152
   0.00000      1.00000         3.00000         3.82500        -0.41373
   0.00000      1.00000         3.00000         3.85000        -0.37653
   0.00000      1.00000         3.00000         3.87500        -0.33992
   0.00000      1.00000         3.00000         3.90000        -0.30388
   0.00000      1.00000         3.00000         3.92500        -0.26841
   0.00000      1.00000         3.00000         3.95000        -0.23347
   0.00000      1.00000         3.00000         3.97500        -0.19908
   0.00000      1.00000         3.00000         4.00000        -0.16520
   0.00000      1.00000         3.00000         4.02500        -0.13184
   0.00000      1.00000         3.00000         4.05000        -0.09898
   0.00000      1.00000         3.00000         4.07500        -0.06661
   0.00000      1.00000         3.00000         4.10000        -0.03471
   0.00000      1.00000         3.00000         4.12500        -0.00329
   0.00000      1.00000         3.00000         4.15000         0.02768
   0.00000      1.00000         3.00000         4.17500         0.05819
   0.00000      1.00000         3.00000         4.20000         0.08827
   0.00000      1.00000         3.00000         4.22500         0.11791
   0.00000      1.00000         3.00000         4.25000         0.14714
   0.00000      1.00000         3.00000         4.27500         0.17595
   0.00000      1.00000         3.00000         4.30000         0.20435
   0.00000      1.00000         3.00000         4.32500         0.23236
   0.00000      1.00000         3.00000         4.35000         0.25998
   0.00000      1.00000         3.00000         4.37500         0.28721
   0.00000      1.00000         3.00000         4.40000         0.31408
   0.00000      1.00000         3.00000         4.42500         0.34057
   0.00000      1.00000         3.00000         4.45000         0.36671
   0.00000      1.00000         3.00000         4.47500         0.39250
   0.00000      1.00000         3.00000         4.50000         0.41794
   0.00000      1.00000         3.00000         4.52500         0.44304
   0.00000      1.00000         3.00000         4.55000         0.46781
   0.00000      1.00000         3.00000         4.57500         0.49225
   0.00000      1.00000         3.00000         4.60000         0.51638
   0.00000      1.00000         3.00000         4.62500         0.54019
   0.00000      1.00000         3.00000         4.65000         0.56369
   0.00000      1.00000         3.00000         4.67500         0.58689
   0.00000      1.00000         3.00000         4.70000         0.60979
   0.00000      1.00000         3.00000         4.72500         0.63240
   0.00000      1.00000         3.00000         4.75000         0.65472
   0.00000      1.00000         3.00000         4.77500         0.67677
   0.00000      1.00000         3.00000         4.80000         0.69853
   0.00000      1.00000         3.00000         4.82500         0.72003
   0.00000      1.00000         3.00000         4.85000         0.74126
   0.00000      1.00000         3.00000         4.87500         0.76223
   0.00000      1.00000         3.00000         4.90000         0.78294
   0.00000      1.00000         3.00000         4.92500         0.80340
   0.00000      1.00000         4.00000         0.72500      -121.50669
   0.00000      1.00000         4.00000         0.75000      -105.43999
   0.00000      1.00000         4.00000         0.77500       -92.58087
   0.00000      1.00000         4.00000         0.80000       -82.12306
   0.00000      1.00000         4.00000         0.82500       -73.49581
   0.00000      1.00000         4.00000         0.85000       -66.28713
   0.00000      1.00000         4.00000         0.87500       -60.19424
   0.00000      1.00000         4.00000         0.90000       -54.99097
   0.00000      1.00000         4.00000         0.92500       -50.50579
   0.00000      1.00000         4.00000         0.95000       -46.60684
   0.00000      1.00000         4.00000         0.97500       -43.19146
   0.00000      1.00000         4.00000         1.00000       -40.17875
   0.00000      1.00000         4.00000         1.02500       -37.50429
   0.00000      1.00000         4.00000         1.05000       -35.11628
   0.00000      1.00000         4.00000         1.07500       -32.97263
   0.00000      1.00000         4.00000         1.10000       -31.03890
   0.00000      1.00000         4.00000         1.12500       -29.28664
   0.00000      1.00000         4.00000         1.15000       -27.69219
   0.00000      1.00000         4.00000         1.17500       -26.23573
   0.00000      1.00000         4.00000         1.20000       -24.90056
   0.00000      1.00000         4.00000         1.22500       -23.67251
   0.00000      1.00000         4.00000         1.25000       -22.53947
   0.00000      1.00000         4.00000         1.27500       -21.49108
   0.00000      1.00000         4.00000         1.30000       -20.51839
   0.00000      1.00000         4.00000         1.32500       -19.61365
   0.00000      1.00000         4.00000         1.35000       -18.77012
   0.00000      1.00000         4.00000         1.37500       -17.98190
   0.00000      1.00000         4.00000         1.40000       -17.24383
   0.00000      1.00000         4.00000         1.42500       -16.55135
   0.00000      1.00000         4.00000         1.45000       -15.90043
   0.00000      1.00000         4.00000         1.47500       -15.28750
   0.00000      1.00000         4.00000         1.50000       -14.70938
   0.00000      1.00000         4.00000         1.52500       -14.16322
   0.00000      1.00000         4.00000         1.55000       -13.64650
   0.00000      1.00000         4.00000         1.57500       -13.15693
   0.00000      1.00000         4.00000         1.60000       -12.69245
   0.00000      1.00000         4.00000         1.62500       -12.25122
   0.00000      1.00000         4.00000         1.65000       -11.83154
   0.00000      1.00000         4.00000         1.67500       -11.43191
   0.00000      1.00000         4.00000         1.70000       -11.05094
   0.00000      1.00000         4.00000         1.72500       -10.68737
   0.00000      1.00000         4.00000         1.75000       -10.34005
   0.00000      1.00000         4.00000         1.77500       -10.00793
   0.00000      1.00000         4.00000         1.80000        -9.69004
   0.00000      1.00000         4.00000         1.82500        -9.38551
   0.00000      1.00000         4.00000         1.85000        -9.09351
   0.00000      1.00000         4.00000         1.87500        -8.81331
   0.00000      1.00000         4.00000         1.90000        -8.54421
   0.00000      1.00000         4.00000         1.92500        -8.28557
   0.00000      1.00000         4.00000         1.95000        -8.03681
   0.00000      1.00000         4.00000         1.97500        -7.79737
   0.00000      1.00000         4.00000         2.00000        -7.56674
   0.00000      1.00000         4.00000         2.02500        -7.34447
   0.00000      1.00000         4.00000         2.05000        -7.13010
   0.00000      1.00000         4.00000         2.07500        -6.92323
   0.00000      1.00000         4.00000         2.10000        -6.72347
   0.00000      1.00000         4.00000         2.12500        -6.53048
   0.00000      1.00000         4.00000         2.15000        -6.34392
   0.00000      1.00000         4.00000         2.17500        -6.16347
   0.00000      1.00000         4.00000         2.20000        -5.98885
   0.00000      1.00000         4.00000         2.22500        -5.81979
   0.00000      1.00000         4.00000         2.25000        -5.65601
   0.00000      1.00000         4.00000         2.27500        -5.49730
   0.00000      1.00000         4.00000         2.30000        -5.34341
   0.00000      1.00000         4.00000         2.32500        -5.19413
   0.00000      1.00000         4.00000         2.35000        -5.04927
   0.00000      1.00000         4.00000         2.37500        -4.90863
   0.00000      1.00000         4.00000         2.40000        -4.77204
   0.00000      1.00000         4.00000         2.42500        -4.63932
   0.00000      1.00000         4.00000         2.45000        -4.51031
   0.00000      1.00000         4.00000         2.47500        -4.38487
   0.00000      1.00000         4.00000         2.50000        -4.26285
   0.00000      1.00000         4.00000         2.52500        -4.14411
   0.00000      1.00000         4.00000         2.55000        -4.02854
   0.00000      1.00000         4.00000         2.57500        -3.91599
   0.00000      1.00000         4.00000         2.60000        -3.80636
   0.00000      1.00000         4.00000         2.62500        -3.69955
   0.00000      1.00000         4.00000         2.65000        -3.59543
   0.00000      1.00000         4.00000         2.67500        -3.49392
   0.00000      1.00000         4.00000         2.70000        -3.39492
   0.00000      1.00000         4.00000         2.72500        -3.29834
   0.00000      1.00000         4.00000         2.75000        -3.20410
   0.00000      1.00000         4.00000         2.77500        -3.11210
   0.00000      1.00000         4.00000         2.80000        -3.02228
   0.00000      1.00000         4.00000         2.82500        -2.93456
   0.00000      1.00000         4.00000         2.85000        -2.84886
   0.00000      1.00000         4.00000         2.87500        -2.76513
   0.00000      1.00000         4.00000         2.90000        -2.68329
   0.00000      1.00000         4.00000         2.92500        -2.60328
   0.00000      1.00000         4.00000         2.95000        -2.52504
   0.00000      1.00000         4.00000         2.97500        -2.44852
   0.00000      1.00000         4.00000         3.00000        -2.37366
   0.00000      1.00000         4.00000         3.02500        -2.30041
   0.00000      1.00000         4.00000         3.05000        -2.22872
   0.00000      1.00000         4.00000         3.07500        -2.15854
   0.00000      1.00000         4.00000         3.10000        -2.08982
   0.00000      1.00000         4.00000         3.12500        -2.02252
   0.00000      1.00000         4.00000         3.15000        -1.95660
   0.00000      1.00000         4.00000         3.17500        -1.89202
   0.00000      1.00000         4.00000         3.20000        -1.82874
   0.00000      1.00000         4.00000         3.22500        -1.76671
   0.00000      1.00000         4.00000         3.25000        -1.70591
   0.00000      1.00000         4.00000         3.27500        -1.64629
   0.00000      1.00000         4.00000         3.30000        -1.58783
   0.00000      1.00000         4.00000         3.32500        -1.53049
   0.00000      1.00000         4.00000         3.35000        -1.47425
   0.00000      1.00000         4.00000         3.37500        -1.41906
   0.00000      1.00000         4.00000         3.40000        -1.36491
   0.00000      1.00000         4.00000         3.42500        -1.31176
   0.00000      1.00000         4.00000         3.45000        -1.25959
   0.00000      1.00000         4.00000         3.47500        -1.20837
   0.00000      1.00000         4.00000         3.50000        -1.15807
   0.00000      1.00000         4.00000         3.52500        -1.10868
   0.00000      1.00000         4.00000         3.55000        -1.06016
   0.00000      1.00000         4.00000         3.57500        -1.01250
   0.00000      1.00000         4.00000         3.60000        -0.96568
   0.00000      1.00000         4.00000         3.62500        -0.91967
   0.00000      1.00000         4.00000         3.65000        -0.87445
   0.00000      1.00000         4.00000         3.67500        -0.83000
   0.00000      1.00000         4.00000         3.70000        -0.78631
   0.00000      1.00000         4.00000         3.72500        -0.74336
   0.00000      1.00000         4.00000         3.75000        -0.70112
   0.00000      1.00000         4.00000         3.77500        -0.65958
   0.00000      1.00000         4.00000         3.80000        -0.61872
   0.00000      1.00000         4.00000         3.82500        -0.57853
   0.00000      1.00000         4.00000         3.85000        -0.53900
   0.00000      1.00000         4.00000         3.87500        -0.50010
   0.00000      1.00000         4.00000         3.90000        -0.46182
   0.00000      1.00000         4.00000         3.92500        -0.42415
   0.00000      1.00000         4.00000         3.95000        -0.38707
   0.00000      1.00000         4.00000         3.97500        -0.35057
   0.00000      1.00000         4.00000         4.00000        -0.31464
   0.00000      1.00000         4.00000         4.02500        -0.27927
   0.00000      1.00000         4.00000         4.05000        -0.24443
   0.00000      1.00000         4.00000         4.07500        -0.21013
   0.00000      1.00000         4.00000         4.10000        -0.17634
   0.00000      1.00000         4.00000         4.12500        -0.14306
   0.00000      1.00000         4.00000         4.15000        -0.11028
   0.00000      1.00000         4.00000         4.17500        -0.07798
   0.00000      1.00000         4.00000         4.20000        -0.04616
   0.00000      1.00000         4.00000         4.22500        -0.01480
   0.00000      1.00000         4.00000         4.25000         0.01610
   0.00000      1.00000         4.00000         4.27500         0.04656
   0.00000      1.00000         4.00000         4.30000         0.07658
   0.00000      1.00000         4.00000         4.32500         0.10617
   0.00000      1.00000         4.00000         4.35000         0.13534
   0.00000      1.00000         4.00000         4.37500         0.16410
   0.00000      1.00000         4.00000         4.40000         0.19246
   0.00000      1.00000         4.00000         4.42500         0.22043
   0.00000      1.00000         4.00000         4.45000         0.24800
   0.00000      1.00000         4.00000         4.47500         0.27521
   0.00000      1.00000         4.00000         4.50000         0.30203
   0.00000      1.00000         4.00000         4.52500         0.32850
   0.00000      1.00000         4.00000         4.55000         0.35461
   0.00000      1.00000         4.00000         4.57500         0.38037
   0.00000      1.00000         4.00000         4.60000         0.40578
   0.00000      1.00000         4.00000         4.62500         0.43086
   0.00000      1.00000         4.00000         4.65000         0.45561
   0.00000      1.00000         4.00000         4.67500         0.48003
   0.00000      1.00000         4.00000         4.70000         0.50414
   0.00000      1.00000         4.00000         4.72500         0.52793
   0.00000      1.00000         4.00000         4.75000         0.55142
   0.00000      1.00000         4.00000         4.77500         0.57461
   0.00000      1.00000         4.00000         4.80000         0.59750
   0.00000      1.00000         4.00000         4.82500         0.62010
   0.00000      1.00000         4.00000         4.85000         0.64242
   0.00000      1.00000         4.00000         4.87500         0.66445
   0.00000      1.00000         4.00000         4.90000         0.68622
   0.00000      1.00000         4.00000         4.92500         0.70771
   0.00000      1.00000         4.00000         4.95000         0.72894
   0.00000      1.00000         4.00000         4.97500         0.74991
   0.00000      1.00000         4.00000         5.00000         0.77062
   0.00000      1.00000         4.00000         5.02500         0.79108
   0.00000      1.00000         4.00000         5.05000         0.81129
   0.00000      1.00000         4.00000         5.07500         0.83127
   0.00000      1.00000         4.00000         5.10000         0.85100
   0.00000      1.00000         6.00000         0.72500      -357.06747
   0.00000      1.00000         6.00000         0.75000      -286.52105
   0.00000      1.00000         6.00000         0.77500      -234.60751
   0.00000      1.00000         6.00000         0.80000      -195.54225
   0.00000      1.00000         6.00000         0.82500      -165.54584
   0.00000      1.00000         6.00000         0.85000      -142.08833
   0.00000      1.00000         6.00000         0.87500      -123.43809
   0.00000      1.00000         6.00000         0.90000      -108.38557
   0.00000      1.00000         6.00000         0.92500       -96.06985
   0.00000      1.00000         6.00000         0.95000       -85.86748
   0.00000      1.00000         6.00000         0.97500       -77.31973
   0.00000      1.00000         6.00000         1.00000       -70.08405
   0.00000      1.00000         6.00000         1.02500       -63.90106
   0.00000      1.00000         6.00000         1.05000       -58.57192
   0.00000      1.00000         6.00000         1.07500       -53.94231
   0.00000      1.00000         6.00000         1.10000       -49.89119
   0.00000      1.00000         6.00000         1.12500       -46.32260
   0.00000      1.00000         6.00000         1.15000       -43.15976
   0.00000      1.00000         6.00000         1.17500       -40.34066
   0.00000      1.00000         6.00000         1.20000       -37.81481
   0.00000      1.00000         6.00000         1.22500       -35.54075
   0.00000      1.00000         6.00000         1.25000       -33.48421
   0.00000      1.00000         6.00000         1.27500       -31.61667
   0.00000      1.00000         6.00000         1.30000       -29.91418
   0.00000      1.00000         6.00000         1.32500       -28.35659
   0.00000      1.00000         6.00000         1.35000       -26.92679
   0.00000      1.00000         6.00000         1.37500       -25.61017
   0.00000      1.00000         6.00000         1.40000       -24.39422
   0.00000      1.00000         6.00000         1.42500       -23.26816
   0.00000      1.00000         6.00000         1.45000       -22.22267
   0.00000      1.00000         6.00000         1.47500       -21.24962
   0.00000      1.00000         6.00000         1.50000       -20.34194
   0.00000      1.00000         6.00000         1.52500       -19.49342
   0.00000      1.00000         6.00000         1.55000       -18.69860
   0.00000      1.00000         6.00000         1.57500       -17.95265
   0.00000      1.00000         6.00000         1.60000       -17.25130
   0.00000      1.00000         6.00000         1.62500       -16.59076
   0.00000      1.00000         6.00000         1.65000       -15.96765
   0.00000      1.00000         6.00000         1.67500       -15.37893
   0.00000      1.00000         6.00000         1.70000       -14.82190
   0.00000      1.00000         6.00000         1.72500       -14.29411
   0.00000      1.00000         6.00000         1.75000       -13.79337
   0.00000      1.00000         6.00000         1.77500       -13.31769
   0.00000      1.00000         6.00000         1.80000       -12.86527
   0.00000      1.00000         6.00000         1.82500       -12.43447
   0.00000      1.00000         6.00000         1.85000       -12.02382
   0.00000      1.00000         6.00000         1.87500       -11.63195
   0.00000      1.00000         6.00000         1.90000       -11.25764
   0.00000      1.00000         6.00000         1.92500       -10.89975
   0.00000      1.00000         6.00000         1.95000       -10.55724
   0.00000      1.00000         6.00000         1.97500       -10.22916
   0.00000      1.00000         6.00000         2.00000        -9.91463
   0.00000      1.00000         6.00000         2.02500        -9.61284
   0.00000      1.00000         6.00000         2.05000        -9.32306
   0.00000      1.00000         6.00000         2.07500        -9.04459
   0.00000      1.00000         6.00000         2.10000        -8.77679
   0.00000      1.00000         6.00000         2.12500        -8.51907
   0.00000      1.00000         6.00000         2.15000        -8.27089
   0.00000      1.00000         6.00000         2.17500        -8.03174
   0.00000      1.00000         6.00000         2.20000        -7.80113
   0.00000      1.00000         6.00000         2.22500        -7.57863
   0.00000      1.00000         6.00000         2.25000        -7.36383
   0.00000      1.00000         6.00000         2.27500        -7.15634
   0.00000      1.00000         6.00000         2.30000        -6.95580
   0.00000      1.00000         6.00000         2.32500        -6.76187
   0.00000      1.00000         6.00000         2.35000        -6.57424
   0.00000      1.00000         6.00000         2.37500        -6.39262
   0.00000      1.00000         6.00000         2.40000        -6.21671
   0.00000      1.00000         6.00000         2.42500        -6.04627
   0.00000      1.00000         6.00000         2.45000        -5.88105
   0.00000      1.00000         6.00000         2.47500        -5.72082
   0.00000      1.00000         6.00000         2.50000        -5.56535
   0.00000      1.00000         6.00000         2.52500        -5.41445
   0.00000      1.00000         6.00000         2.55000        -5.26791
   0.00000      1.00000         6.00000         2.57500        -5.12557
   0.00000      1.00000         6.00000         2.60000        -4.98723
   0.00000      1.00000         6.00000         2.62500        -4.85274
   0.00000      1.00000         6.00000         2.65000        -4.72195
   0.00000      1.00000         6.00000         2.67500        -4.59471
   0.00000      1.00000         6.00000         2.70000        -4.47087
   0.00000      1.00000         6.00000         2.72500        -4.35031
   0.00000      1.00000         6.00000         2.75000        -4.23289
   0.00000      1.00000         6.00000         2.77500        -4.11851
   0.00000      1.00000         6.00000         2.80000        -4.00705
   0.00000      1.00000         6.00000         2.82500        -3.89840
   0.00000      1.00000         6.00000         2.85000        -3.79245
   0.00000      1.00000         6.00000         2.87500        -3.68911
   0.00000      1.00000         6.00000         2.90000        -3.58830
   0.00000      1.00000         6.00000         2.92500        -3.48990
   0.00000      1.00000         6.00000         2.95000        -3.39386
   0.00000      1.00000         6.00000         2.97500        -3.30007
   0.00000      1.00000         6.00000         3.00000        -3.20847
   0.00000      1.00000         6.00000         3.02500        -3.11898
   0.00000      1.00000         6.00000         3.05000        -3.03154
   0.00000      1.00000         6.00000         3.07500        -2.94607
   0.00000      1.00000         6.00000         3.10000        -2.86250
   0.00000      1.00000         6.00000         3.12500        -2.78079
   0.00000      1.00000         6.00000         3.15000        -2.70086
   0.00000      1.00000         6.00000         3.17500        -2.62267
   0.00000      1.00000         6.00000         3.20000        -2.54616
   0.00000      1.00000         6.00000         3.22500        -2.47127
   0.00000      1.00000         6.00000         3.25000        -2.39795
   0.00000      1.00000         6.00000         3.27500        -2.32617
   0.00000      1.00000         6.00000         3.30000        -2.25586
   0.00000      1.00000         6.00000         3.32500        -2.18700
   0.00000      1.00000         6.00000         3.35000        -2.11953
   0.00000      1.00000         6.00000         3.37500        -2.05341
   0.00000      1.00000         6.00000         3.40000        -1.98861
   0.00000      1.00000         6.00000         3.42500        -1.92509
   0.00000      1.00000         6.00000         3.45000        -1.86281
   0.00000      1.00000         6.00000         3.47500        -1.80173
   0.00000      1.00000         6.00000         3.50000        -1.74183
   0.00000      1.00000         6.00000         3.52500        -1.68307
   0.00000      1.00000         6.00000         3.55000        -1.62541
   0.00000      1.00000         6.00000         3.57500        -1.56884
   0.00000      1.00000         6.00000         3.60000        -1.51331
   0.00000      1.00000         6.00000         3.62500        -1.45880
   0.00000      1.00000         6.00000         3.65000        -1.40529
   0.00000      1.00000         6.00000         3.67500        -1.35275
   0.00000      1.00000         6.00000         3.70000        -1.30115
   0.00000      1.00000         6.00000         3.72500        -1.25047
   0.00000      1.00000         6.00000         3.75000        -1.20068
   0.00000      1.00000         6.00000         3.77500        -1.15177
   0.00000      1.00000         6.00000         3.80000        -1.10371
   0.00000      1.00000         6.00000         3.82500        -1.05647
   0.00000      1.00000         6.00000         3.85000        -1.01005
   0.00000      1.00000         6.00000         3.87500        -0.96441
   0.00000      1.00000         6.00000         3.90000        -0.91954
   0.00000      1.00000         6.00000         3.92500        -0.87542
   0.00000      1.00000         6.00000         3.95000        -0.83204
   0.00000      1.00000         6.00000         3.97500        -0.78936
   0.00000      1.00000         6.00000         4.00000        -0.74739
   0.00000      1.00000         6.00000         4.02500        -0.70610
   0.00000      1.00000         6.00000         4.05000        -0.66548
   0.00000      1.00000         6.00000         4.07500        -0.62550
   0.00000      1.00000         6.00000         4.10000        -0.58616
   0.00000      1.00000         6.00000         4.12500        -0.54744
   0.00000      1.00000         6.00000         4.15000        -0.50933
   0.00000      1.00000         6.00000         4.17500        -0.47181
   0.00000      1.00000         6.00000         4.20000        -0.43487
   0.00000      1.00000         6.00000         4.22500        -0.39850
   0.00000      1.00000         6.00000         4.25000        -0.36268
   0.00000      1.00000         6.00000         4.27500        -0.32741
   0.00000      1.00000         6.00000         4.30000        -0.29266
   0.00000      1.00000         6.00000         4.32500        -0.25844
   0.00000      1.00000         6.00000         4.35000        -0.22472
   0.00000      1.00000         6.00000         4.37500        -0.19150
   0.00000      1.00000         6.00000         4.40000        -0.15877
   0.00000      1.00000         6.00000         4.42500        -0.12651
   0.00000      1.00000         6.00000         4.45000        -0.09472
   0.00000      1.00000         6.00000         4.47500        -0.06339
   0.00000      1.00000         6.00000         4.50000        -0.03250
   0.00000      1.00000         6.00000         4.52500        -0.00206
   0.00000      1.00000         6.00000         4.55000         0.02796
   0.00000      1.00000         6.00000         4.57500         0.05756
   0.00000      1.00000         6.00000         4.60000         0.08674
   0.00000      1.00000         6.00000         4.62500         0.11552
   0.00000      1.00000         6.00000         4.65000         0.14390
   0.00000      1.00000         6.00000         4.67500         0.17190
   0.00000      1.00000         6.00000         4.70000         0.19951
   0.00000      1.00000         6.00000         4.72500         0.22676
   0.00000      1.00000         6.00000         4.75000         0.25363
   0.00000      1.00000         6.00000         4.77500         0.28015
   0.00000      1.00000         6.00000         4.80000         0.30631
   0.00000      1.00000         6.00000         4.82500         0.33213
   0.00000      1.00000         6.00000         4.85000         0.35761
   0.00000      1.00000         6.00000         4.87500         0.38275
   0.00000      1.00000         6.00000         4.90000         0.40757
   0.00000      1.00000         6.00000         4.92500         0.43207
   0.00000      1.00000         6.00000         4.95000         0.45626
   0.00000      1.00000         6.00000         4.97500         0.48013
   0.00000      1.00000         6.00000         5.00000         0.50370
   0.00000      1.00000         6.00000         5.02500         0.52698
   0.00000      1.00000         6.00000         5.05000         0.54996
   0.00000      1.00000         6.00000         5.07500         0.57265
   0.00000      1.00000         6.00000         5.10000         0.59507
   0.00000      1.00000         8.00000         0.72500     -1660.20521
   0.00000      1.00000         8.00000         0.75000     -1204.85183
   0.00000      1.00000         8.00000         0.77500      -898.76664
   0.00000      1.00000         8.00000         0.80000      -687.28720
   0.00000      1.00000         8.00000         0.82500      -537.47075
   0.00000      1.00000         8.00000         0.85000      -428.88580
   0.00000      1.00000         8.00000         0.87500      -348.52329
   0.00000      1.00000         8.00000         0.90000      -287.89810
   0.00000      1.00000         8.00000         0.92500      -241.35174
   0.00000      1.00000         8.00000         0.95000      -205.03274
   0.00000      1.00000         8.00000         0.97500      -176.26953
   0.00000      1.00000         8.00000         1.00000      -153.17617
   0.00000      1.00000         8.00000         1.02500      -134.39950
   0.00000      1.00000         8.00000         1.05000      -118.95380
   0.00000      1.00000         8.00000         1.07500      -106.11078
   0.00000      1.00000         8.00000         1.10000       -95.32523
   0.00000      1.00000         8.00000         1.12500       -86.18392
   0.00000      1.00000         8.00000         1.15000       -78.37000
   0.00000      1.00000         8.00000         1.17500       -71.63792
   0.00000      1.00000         8.00000         1.20000       -65.79539
   0.00000      1.00000         8.00000         1.22500       -60.69040
   0.00000      1.00000         8.00000         1.25000       -56.20171
   0.00000      1.00000         8.00000         1.27500       -52.23178
   0.00000      1.00000         8.00000         1.30000       -48.70151
   0.00000      1.00000         8.00000         1.32500       -45.54627
   0.00000      1.00000         8.00000         1.35000       -42.71289
   0.00000      1.00000         8.00000         1.37500       -40.15730
   0.00000      1.00000         8.00000         1.40000       -37.84277
   0.00000      1.00000         8.00000         1.42500       -35.73848
   0.00000      1.00000         8.00000         1.45000       -33.81844
   0.00000      1.00000         8.00000         1.47500       -32.06059
   0.00000      1.00000         8.00000         1.50000       -30.44614
   0.00000      1.00000         8.00000         1.52500       -28.95896
   0.00000      1.00000         8.00000         1.55000       -27.58520
   0.00000      1.00000         8.00000         1.57500       -26.31286
   0.00000      1.00000         8.00000         1.60000       -25.13153
   0.00000      1.00000         8.00000         1.62500       -24.03213
   0.00000      1.00000         8.00000         1.65000       -23.00671
   0.00000      1.00000         8.00000         1.67500       -22.04831
   0.00000      1.00000         8.00000         1.70000       -21.15077
   0.00000      1.00000         8.00000         1.72500       -20.30866
   0.00000      1.00000         8.00000         1.75000       -19.51713
   0.00000      1.00000         8.00000         1.77500       -18.77192
   0.00000      1.00000         8.00000         1.80000       -18.06917
   0.00000      1.00000         8.00000         1.82500       -17.40546
   0.00000      1.00000         8.00000         1.85000       -16.77772
   0.00000      1.00000         8.00000         1.87500       -16.18317
   0.00000      1.00000         8.00000         1.90000       -15.61932
   0.00000      1.00000         8.00000         1.92500       -15.08391
   0.00000      1.00000         8.00000         1.95000       -14.57489
   0.00000      1.00000         8.00000         1.97500       -14.09042
   0.00000      1.00000         8.00000         2.00000       -13.62879
   0.00000      1.00000         8.00000         2.02500       -13.18848
   0.00000      1.00000         8.00000         2.05000       -12.76806
   0.00000      1.00000         8.00000         2.07500       -12.36626
   0.00000      1.00000         8.00000         2.10000       -11.98189
   0.00000      1.00000         8.00000         2.12500       -11.61388
   0.00000      1.00000         8.00000         2.15000       -11.26121
   0.00000      1.00000         8.00000         2.17500       -10.92298
   0.00000      1.00000         8.00000         2.20000       -10.59834
   0.00000      1.00000         8.00000         2.22500       -10.28649
   0.00000      1.00000         8.00000         2.25000        -9.98673
   0.00000      1.00000         8.00000         2.27500        -9.69837
   0.00000      1.00000         8.00000         2.30000        -9.42079
   0.00000      1.00000         8.00000         2.32500        -9.15341
   0.00000      1.00000         8.00000         2.35000        -8.89569
   0.00000      1.00000         8.00000         2.37500        -8.64714
   0.00000      1.00000         8.00000         2.40000        -8.40727
   0.00000      1.00000         8.00000         2.42500        -8.17566
   0.00000      1.00000         8.00000         2.45000        -7.95189
   0.00000      1.00000         8.00000         2.47500        -7.73559
   0.00000      1.00000         8.00000         2.50000        -7.52639
   0.00000      1.00000         8.00000         2.52500        -7.32396
   0.00000      1.00000         8.00000         2.55000        -7.12798
   0.00000      1.00000         8.00000         2.57500        -6.93816
   0.00000      1.00000         8.00000         2.60000        -6.75421
   0.00000      1.00000         8.00000         2.62500        -6.57588
   0.00000      1.00000         8.00000         2.65000        -6.40292
   0.00000      1.00000         8.00000         2.67500        -6.23510
   0.00000      1.00000         8.00000         2.70000        -6.07219
   0.00000      1.00000         8.00000         2.72500        -5.91399
   0.00000      1.00000         8.00000         2.75000        -5.76030
   0.00000      1.00000         8.00000         2.77500        -5.61094
   0.00000      1.00000         8.00000         2.80000        -5.46573
   0.00000      1.00000         8.00000         2.82500        -5.32450
   0.00000      1.00000         8.00000         2.85000        -5.18711
   0.00000      1.00000         8.00000         2.87500        -5.05339
   0.00000      1.00000         8.00000         2.90000        -4.92320
   0.00000      1.00000         8.00000         2.92500        -4.79642
   0.00000      1.00000         8.00000         2.95000        -4.67291
   0.00000      1.00000         8.00000         2.97500        -4.55255
   0.00000      1.00000         8.00000         3.00000        -4.43523
   0.00000      1.00000         8.00000         3.02500        -4.32083
   0.00000      1.00000         8.00000         3.05000        -4.20926
   0.00000      1.00000         8.00000         3.07500        -4.10040
   0.00000      1.00000         8.00000         3.10000        -3.99417
   0.00000      1.00000         8.00000         3.12500        -3.89047
   0.00000      1.00000         8.00000         3.15000        -3.78922
   0.00000      1.00000         8.00000         3.17500        -3.69033
   0.00000      1.00000         8.00000         3.20000        -3.59373
   0.00000      1.00000         8.00000         3.22500        -3.49933
   0.00000      1.00000         8.00000         3.25000        -3.40707
   0.00000      1.00000         8.00000         3.27500        -3.31687
   0.00000      1.00000         8.00000         3.30000        -3.22868
   0.00000      1.00000         8.00000         3.32500        -3.14242
   0.00000      1.00000         8.00000         3.35000        -3.05803
   0.00000      1.00000         8.00000         3.37500        -2.97546
   0.00000      1.00000         8.00000         3.40000        -2.89465
   0.00000      1.00000         8.00000         3.42500        -2.81554
   0.00000      1.00000         8.00000         3.45000        -2.73809
   0.00000      1.00000         8.00000         3.47500        -2.66224
   0.00000      1.00000         8.00000         3.50000        -2.58795
   0.00000      1.00000         8.00000         3.52500        -2.51517
   0.00000      1.00000         8.00000         3.55000        -2.44385
   0.00000      1.00000         8.00000         3.57500        -2.37396
   0.00000      1.00000         8.00000         3.60000        -2.30545
   0.00000      1.00000         8.00000         3.62500        -2.23829
   0.00000      1.00000         8.00000         3.65000        -2.17243
   0.00000      1.00000         8.00000         3.67500        -2.10784
   0.00000      1.00000         8.00000         3.70000        -2.04448
   0.00000      1.00000         8.00000         3.72500        -1.98232
   0.00000      1.00000         8.00000         3.75000        -1.92134
   0.00000      1.00000         8.00000         3.77500        -1.86148
   0.00000      1.00000         8.00000         3.80000        -1.80274
   0.00000      1.00000         8.00000         3.82500        -1.74507
   0.00000      1.00000         8.00000         3.85000        -1.68845
   0.00000      1.00000         8.00000         3.87500        -1.63285
   0.00000      1.00000         8.00000         3.90000        -1.57824
   0.00000      1.00000         8.00000         3.92500        -1.52460
   0.00000      1.00000         8.00000         3.95000        -1.47191
   0.00000      1.00000         8.00000         3.97500        -1.42013
   0.00000      1.00000         8.00000         4.00000        -1.36926
   0.00000      1.00000         8.00000         4.02500        -1.31926
   0.00000      1.00000         8.00000         4.05000        -1.27011
   0.00000      1.00000         8.00000         4.07500        -1.22179
   0.00000      1.00000         8.00000         4.10000        -1.17429
   0.00000      1.00000         8.00000         4.12500        -1.12758
   0.00000      1.00000         8.00000         4.15000        -1.08165
   0.00000      1.00000         8.00000         4.17500        -1.03647
   0.00000      1.00000         8.00000         4.20000        -0.99202
   0.00000      1.00000         8.00000         4.22500        -0.94830
   0.00000      1.00000         8.00000         4.25000        -0.90528
   0.00000      1.00000         8.00000         4.27500        -0.86295
   0.00000      1.00000         8.00000         4.30000        -0.82129
   0.00000      1.00000         8.00000         4.32500        -0.78029
   0.00000      1.00000         8.00000         4.35000        -0.73993
   0.00000      1.00000         8.00000         4.37500        -0.70019
   0.00000      1.00000         8.00000         4.40000        -0.66107
   0.00000      1.00000         8.00000         4.42500        -0.62255
   0.00000      1.00000         8.00000         4.45000        -0.58462
   0.00000      1.00000         8.00000         4.47500        -0.54726
   0.00000      1.00000         8.00000         4.50000        -0.51046
   0.00000      1.00000         8.00000         4.52500        -0.47422
   0.00000      1.00000         8.00000         4.55000        -0.43851
   0.00000      1.00000         8.00000         4.57500        -0.40332
   0.00000      1.00000         8.00000         4.60000        -0.36865
   0.00000      1.00000         8.00000         4.62500        -0.33449
   0.00000      1.00000         8.00000         4.65000        -0.30082
   0.00000      1.00000         8.00000         4.67500        -0.26763
   0.00000      1.00000         8.00000         4.70000        -0.23492
   0.00000      1.00000         8.00000         4.72500        -0.20268
   0.00000      1.00000         8.00000         4.75000        -0.17088
   0.00000      1.00000         8.00000         4.77500        -0.13954
   0.00000      1.00000         8.00000         4.80000        -0.10863
   0.00000      1.00000         8.00000         4.82500        -0.07814
   0.00000      1.00000         8.00000         4.85000        -0.04808
   0.00000      1.00000         8.00000         4.87500        -0.01843
   0.00000      1.00000         8.00000         4.90000         0.01081
   0.00000      1.00000         8.00000         4.92500         0.03967
   0.00000      1.00000         8.00000         4.95000         0.06813
   0.00000      1.00000         8.00000         4.97500         0.09621
   0.00000      1.00000         8.00000         5.00000         0.12392
   0.00000      1.00000         8.00000         5.02500         0.15126
   0.00000      1.00000         8.00000         5.05000         0.17824
   0.00000      1.00000         8.00000         5.07500         0.20488
   0.00000      1.00000         8.00000         5.10000         0.23116
   0.00000      1.00000        10.00000         0.72500    -11011.71308
   0.00000      1.00000        10.00000         0.75000     -7228.43751
   0.00000      1.00000        10.00000         0.77500     -4901.23012
   0.00000      1.00000        10.00000         0.80000     -3422.84392
   0.00000      1.00000        10.00000         0.82500     -2455.73786
   0.00000      1.00000        10.00000         0.85000     -1805.91993
   0.00000      1.00000        10.00000         0.87500     -1358.44770
   0.00000      1.00000        10.00000         0.90000     -1043.28761
   0.00000      1.00000        10.00000         0.92500      -816.65949
   0.00000      1.00000        10.00000         0.95000      -650.54017
   0.00000      1.00000        10.00000         0.97500      -526.59623
   0.00000      1.00000        10.00000         1.00000      -432.58847
   0.00000      1.00000        10.00000         1.02500      -360.19129
   0.00000      1.00000        10.00000         1.05000      -303.64152
   0.00000      1.00000        10.00000         1.07500      -258.88434
   0.00000      1.00000        10.00000         1.10000      -223.02321
   0.00000      1.00000        10.00000         1.12500      -193.95936
   0.00000      1.00000        10.00000         1.15000      -170.15172
   0.00000      1.00000        10.00000         1.17500      -150.45448
   0.00000      1.00000        10.00000         1.20000      -134.00564
   0.00000      1.00000        10.00000         1.22500      -120.14954
   0.00000      1.00000        10.00000         1.25000      -108.38220
   0.00000      1.00000        10.00000         1.27500       -98.31244
   0.00000      1.00000        10.00000         1.30000       -89.63382
   0.00000      1.00000        10.00000         1.32500       -82.10410
   0.00000      1.00000        10.00000         1.35000       -75.53028
   0.00000      1.00000        10.00000         1.37500       -69.75729
   0.00000      1.00000        10.00000         1.40000       -64.65968
   0.00000      1.00000        10.00000         1.42500       -60.13520
   0.00000      1.00000        10.00000         1.45000       -56.09993
   0.00000      1.00000        10.00000         1.47500       -52.48459
   0.00000      1.00000        10.00000         1.50000       -49.23164
   0.00000      1.00000        10.00000         1.52500       -46.29296
   0.00000      1.00000        10.00000         1.55000       -43.62815
   0.00000      1.00000        10.00000         1.57500       -41.20307
   0.00000      1.00000        10.00000         1.60000       -38.98874
   0.00000      1.00000        10.00000         1.62500       -36.96045
   0.00000      1.00000        10.00000         1.65000       -35.09700
   0.00000      1.00000        10.00000         1.67500       -33.38018
   0.00000      1.00000        10.00000         1.70000       -31.79422
   0.00000      1.00000        10.00000         1.72500       -30.32545
   0.00000      1.00000        10.00000         1.75000       -28.96197
   0.00000      1.00000        10.00000         1.77500       -27.69336
   0.00000      1.00000        10.00000         1.80000       -26.51050
   0.00000      1.00000        10.00000         1.82500       -25.40534
   0.00000      1.00000        10.00000         1.85000       -24.37078
   0.00000      1.00000        10.00000         1.87500       -23.40054
   0.00000      1.00000        10.00000         1.90000       -22.48904
   0.00000      1.00000        10.00000         1.92500       -21.63128
   0.00000      1.00000        10.00000         1.95000       -20.82283
   0.00000      1.00000        10.00000         1.97500       -20.05970
   0.00000      1.00000        10.00000         2.00000       -19.33831
   0.00000      1.00000        10.00000         2.02500       -18.65545
   0.00000      1.00000        10.00000         2.05000       -18.00821
   0.00000      1.00000        10.00000         2.07500       -17.39396
   0.00000      1.00000        10.00000         2.10000       -16.81032
   0.00000      1.00000        10.00000         2.12500       -16.25512
   0.00000      1.00000        10.00000         2.15000       -15.72641
   0.00000      1.00000        10.00000         2.17500       -15.22238
   0.00000      1.00000        10.00000         2.20000       -14.74140
   0.00000      1.00000        10.00000         2.22500       -14.28196
   0.00000      1.00000        10.00000         2.25000       -13.84270
   0.00000      1.00000        10.00000         2.27500       -13.42234
   0.00000      1.00000        10.00000         2.30000       -13.01974
   0.00000      1.00000        10.00000         2.32500       -12.63381
   0.00000      1.00000        10.00000         2.35000       -12.26357
   0.00000      1.00000        10.00000         2.37500       -11.90811
   0.00000      1.00000        10.00000         2.40000       -11.56658
   0.00000      1.00000        10.00000         2.42500       -11.23822
   0.00000      1.00000        10.00000         2.45000       -10.92228
   0.00000      1.00000        10.00000         2.47500       -10.61809
   0.00000      1.00000        10.00000         2.50000       -10.32504
   0.00000      1.00000        10.00000         2.52500       -10.04253
   0.00000      1.00000        10.00000         2.55000        -9.77002
   0.00000      1.00000        10.00000         2.57500        -9.50701
   0.00000      1.00000        10.00000         2.60000        -9.25302
   0.00000      1.00000        10.00000         2.62500        -9.00761
   0.00000      1.00000        10.00000         2.65000        -8.77035
   0.00000      1.00000        10.00000         2.67500        -8.54087
   0.00000      1.00000        10.00000         2.70000        -8.31880
   0.00000      1.00000        10.00000         2.72500        -8.10378
   0.00000      1.00000        10.00000         2.75000        -7.89551
   0.00000      1.00000        10.00000         2.77500        -7.69368
   0.00000      1.00000        10.00000         2.80000        -7.49800
   0.00000      1.00000        10.00000         2.82500        -7.30821
   0.00000      1.00000        10.00000         2.85000        -7.12404
   0.00000      1.00000        10.00000         2.87500        -6.94526
   0.00000      1.00000        10.00000         2.90000        -6.77164
   0.00000      1.00000        10.00000         2.92500        -6.60298
   0.00000      1.00000        10.00000         2.95000        -6.43906
   0.00000      1.00000        10.00000         2.97500        -6.27969
   0.00000      1.00000        10.00000         3.00000        -6.12470
   0.00000      1.00000        10.00000         3.02500        -5.97391
   0.00000      1.00000        10.00000         3.05000        -5.82715
   0.00000      1.00000        10.00000         3.07500        -5.68428
   0.00000      1.00000        10.00000         3.10000        -5.54514
   0.00000      1.00000        10.00000         3.12500        -5.40960
   0.00000      1.00000        10.00000         3.15000        -5.27752
   0.00000      1.00000        10.00000         3.17500        -5.14877
   0.00000      1.00000        10.00000         3.20000        -5.02324
   0.00000      1.00000        10.00000         3.22500        -4.90080
   0.00000      1.00000        10.00000         3.25000        -4.78135
   0.00000      1.00000        10.00000         3.27500        -4.66479
   0.00000      1.00000        10.00000         3.30000        -4.55101
   0.00000      1.00000        10.00000         3.32500        -4.43992
   0.00000      1.00000        10.00000         3.35000        -4.33143
   0.00000      1.00000        10.00000         3.37500        -4.22545
   0.00000      1.00000        10.00000         3.40000        -4.12189
   0.00000      1.00000        10.00000         3.42500        -4.02068
   0.00000      1.00000        10.00000         3.45000        -3.92175
   0.00000      1.00000        10.00000         3.47500        -3.82501
   0.00000      1.00000        10.00000         3.50000        -3.73040
   0.00000      1.00000        10.00000         3.52500        -3.63785
   0.00000      1.00000        10.00000         3.55000        -3.54730
   0.00000      1.00000        10.00000         3.57500        -3.45868
   0.00000      1.00000        10.00000         3.60000        -3.37194
   0.00000      1.00000        10.00000         3.62500        -3.28701
   0.00000      1.00000        10.00000         3.65000        -3.20385
   0.00000      1.00000        10.00000         3.67500        -3.12241
   0.00000      1.00000        10.00000         3.70000        -3.04262
   0.00000      1.00000        10.00000         3.72500        -2.96444
   0.00000      1.00000        10.00000         3.75000        -2.88784
   0.00000      1.00000        10.00000         3.77500        -2.81275
   0.00000      1.00000        10.00000         3.80000        -2.73914
   0.00000      1.00000        10.00000         3.82500        -2.66697
   0.00000      1.00000        10.00000         3.85000        -2.59619
   0.00000      1.00000        10.00000         3.87500        -2.52677
   0.00000      1.00000        10.00000         3.90000        -2.45867
   0.00000      1.00000        10.00000         3.92500        -2.39185
   0.00000      1.00000        10.00000         3.95000        -2.32629
   0.00000      1.00000        10.00000         3.97500        -2.26194
   0.00000      1.00000        10.00000         4.00000        -2.19877
   0.00000      1.00000        10.00000         4.02500        -2.13676
   0.00000      1.00000        10.00000         4.05000        -2.07587
   0.00000      1.00000        10.00000         4.07500        -2.01608
   0.00000      1.00000        10.00000         4.10000        -1.95734
   0.00000      1.00000        10.00000         4.12500        -1.89965
   0.00000      1.00000        10.00000         4.15000        -1.84297
   0.00000      1.00000        10.00000         4.17500        -1.78728
   0.00000      1.00000        10.00000         4.20000        -1.73255
   0.00000      1.00000        10.00000         4.22500        -1.67876
   0.00000      1.00000        10.00000         4.25000        -1.62588
   0.00000      1.00000        10.00000         4.27500        -1.57390
   0.00000      1.00000        10.00000         4.30000        -1.52279
   0.00000      1.00000        10.00000         4.32500        -1.47253
   0.00000      1.00000        10.00000         4.35000        -1.42310
   0.00000      1.00000        10.00000         4.37500        -1.37448
   0.00000      1.00000        10.00000         4.40000        -1.32666
   0.00000      1.00000        10.00000         4.42500        -1.27960
   0.00000      1.00000        10.00000         4.45000        -1.23331
   0.00000      1.00000        10.00000         4.47500        -1.18775
   0.00000      1.00000        10.00000         4.50000        -1.14291
   0.00000      1.00000        10.00000         4.52500        -1.09878
   0.00000      1.00000        10.00000         4.55000        -1.05534
   0.00000      1.00000        10.00000         4.57500        -1.01258
   0.00000      1.00000        10.00000         4.60000        -0.97047
   0.00000      1.00000        10.00000         4.62500        -0.92901
   0.00000      1.00000        10.00000         4.65000        -0.88818
   0.00000      1.00000        10.00000         4.67500        -0.84797
   0.00000      1.00000        10.00000         4.70000        -0.80836
   0.00000      1.00000        10.00000         4.72500        -0.76934
   0.00000      1.00000        10.00000         4.75000        -0.73090
   0.00000      1.00000        10.00000         4.77500        -0.69303
   0.00000      1.00000        10.00000         4.80000        -0.65571
   0.00000      1.00000        10.00000         4.82500        -0.61893
   0.00000      1.00000        10.00000         4.85000        -0.58269
   0.00000      1.00000        10.00000         4.87500        -0.54697
   0.00000      1.00000        10.00000         4.90000        -0.51175
   0.00000      1.00000        10.00000         4.92500        -0.47704
   0.00000      1.00000        10.00000         4.95000        -0.44282
   0.00000      1.00000        10.00000         4.97500        -0.40907
   0.00000      1.00000        10.00000         5.00000        -0.37580
   0.00000      1.00000        10.00000         5.02500        -0.34299
   0.00000      1.00000        10.00000         5.05000        -0.31063
   0.00000      1.00000        10.00000         5.07500        -0.27871
   0.00000      1.00000        10.00000         5.10000        -0.24723
   0.00000      1.00000        10.00000         5.15000        -0.18553
   0.00000      1.00000        10.00000         5.20000        -0.12548
   0.00000      1.00000        10.00000         5.22500        -0.09604
   0.00000      1.00000        10.00000         5.25000        -0.06700
   0.00000      1.00000        10.00000         5.27500        -0.03833
   0.00000      1.00000        10.00000         5.30000        -0.01004
   0.00000      1.00000        10.00000         5.32500         0.01788
   0.00000      1.00000        10.00000         5.35000         0.04545
   0.00000      1.00000        10.00000         5.37500         0.07266
   0.00000      1.00000        10.00000         5.40000         0.09953
   0.00000      1.00000        10.00000         5.42500         0.12606
   0.00000      1.00000        10.00000         5.50000         0.20365
   0.00000      0.90000         0.00000         0.45000      -312.65840
   0.00000      0.90000         0.00000         0.47500      -242.93976
   0.00000      0.90000         0.00000         0.50000      -194.73401
   0.00000      0.90000         0.00000         0.52500      -160.11956
   0.00000      0.90000         0.00000         0.55000      -134.45607
   0.00000      0.90000         0.00000         0.57500      -114.90179
   0.00000      0.90000         0.00000         0.60000       -99.64808
   0.00000      0.90000         0.00000         0.62500       -87.50446
   0.00000      0.90000         0.00000         0.65000       -77.66381
   0.00000      0.90000         0.00000         0.67500       -69.56447
   0.00000      0.90000         0.00000         0.70000       -62.80634
   0.00000      0.90000         0.00000         0.72500       -57.09847
   0.00000      0.90000         0.00000         0.75000       -52.22529
   0.00000      0.90000         0.00000         0.77500       -48.02434
   0.00000      0.90000         0.00000         0.80000       -44.37136
   0.00000      0.90000         0.00000         0.82500       -41.16993
   0.00000      0.90000         0.00000         0.85000       -38.34432
   0.00000      0.90000         0.00000         0.87500       -35.83432
   0.00000      0.90000         0.00000         0.90000       -33.59161
   0.00000      0.90000         0.00000         0.92500       -31.57695
   0.00000      0.90000         0.00000         0.95000       -29.75827
   0.00000      0.90000         0.00000         0.97500       -28.10908
   0.00000      0.90000         0.00000         1.00000       -26.60735
   0.00000      0.90000         0.00000         1.02500       -25.23464
   0.00000      0.90000         0.00000         1.05000       -23.97538
   0.00000      0.90000         0.00000         1.07500       -22.81639
   0.00000      0.90000         0.00000         1.10000       -21.74638
   0.00000      0.90000         0.00000         1.12500       -20.75569
   0.00000      0.90000         0.00000         1.15000       -19.83598
   0.00000      0.90000         0.00000         1.17500       -18.98003
   0.00000      0.90000         0.00000         1.20000       -18.18153
   0.00000      0.90000         0.00000         1.22500       -17.43499
   0.00000      0.90000         0.00000         1.25000       -16.73557
   0.00000      0.90000         0.00000         1.27500       -16.07901
   0.00000      0.90000         0.00000         1.30000       -15.46155
   0.00000      0.90000         0.00000         1.32500       -14.87984
   0.00000      0.90000         0.00000         1.35000       -14.33091
   0.00000      0.90000         0.00000         1.37500       -13.81210
   0.00000      0.90000         0.00000         1.40000       -13.32103
   0.00000      0.90000         0.00000         1.42500       -12.85556
   0.00000      0.90000         0.00000         1.45000       -12.41376
   0.00000      0.90000         0.00000         1.47500       -11.99389
   0.00000      0.90000         0.00000         1.50000       -11.59438
   0.00000      0.90000         0.00000         1.52500       -11.21380
   0.00000      0.90000         0.00000         1.55000       -10.85084
   0.00000      0.90000         0.00000         1.57500       -10.50434
   0.00000      0.90000         0.00000         1.60000       -10.17319
   0.00000      0.90000         0.00000         1.62500        -9.85643
   0.00000      0.90000         0.00000         1.65000        -9.55313
   0.00000      0.90000         0.00000         1.67500        -9.26247
   0.00000      0.90000         0.00000         1.70000        -8.98369
   0.00000      0.90000         0.00000         1.72500        -8.71607
   0.00000      0.90000         0.00000         1.75000        -8.45897
   0.00000      0.90000         0.00000         1.77500        -8.21178
   0.00000      0.90000         0.00000         1.80000        -7.97396
   0.00000      0.90000         0.00000         1.82500        -7.74497
   0.00000      0.90000         0.00000         1.85000        -7.52435
   0.00000      0.90000         0.00000         1.87500        -7.31165
   0.00000      0.90000         0.00000         1.90000        -7.10646
   0.00000      0.90000         0.00000         1.92500        -6.90838
   0.00000      0.90000         0.00000         1.95000        -6.71706
   0.00000      0.90000         0.00000         1.97500        -6.53216
   0.00000      0.90000         0.00000         2.00000        -6.35337
   0.00000      0.90000         0.00000         2.02500        -6.18040
   0.00000      0.90000         0.00000         2.05000        -6.01296
   0.00000      0.90000         0.00000         2.07500        -5.85081
   0.00000      0.90000         0.00000         2.10000        -5.69369
   0.00000      0.90000         0.00000         2.12500        -5.54138
   0.00000      0.90000         0.00000         2.15000        -5.39366
   0.00000      0.90000         0.00000         2.17500        -5.25033
   0.00000      0.90000         0.00000         2.20000        -5.11121
   0.00000      0.90000         0.00000         2.22500        -4.97610
   0.00000      0.90000         0.00000         2.25000        -4.84485
   0.00000      0.90000         0.00000         2.27500        -4.71729
   0.00000      0.90000         0.00000         2.30000        -4.59327
   0.00000      0.90000         0.00000         2.32500        -4.47265
   0.00000      0.90000         0.00000         2.35000        -4.35528
   0.00000      0.90000         0.00000         2.37500        -4.24105
   0.00000      0.90000         0.00000         2.40000        -4.12983
   0.00000      0.90000         0.00000         2.42500        -4.02151
   0.00000      0.90000         0.00000         2.45000        -3.91597
   0.00000      0.90000         0.00000         2.47500        -3.81311
   0.00000      0.90000         0.00000         2.50000        -3.71283
   0.00000      0.90000         0.00000         2.52500        -3.61503
   0.00000      0.90000         0.00000         2.55000        -3.51964
   0.00000      0.90000         0.00000         2.57500        -3.42655
   0.00000      0.90000         0.00000         2.60000        -3.33569
   0.00000      0.90000         0.00000         2.62500        -3.24699
   0.00000      0.90000         0.00000         2.65000        -3.16036
   0.00000      0.90000         0.00000         2.67500        -3.07574
   0.00000      0.90000         0.00000         2.70000        -2.99306
   0.00000      0.90000         0.00000         2.72500        -2.91225
   0.00000      0.90000         0.00000         2.75000        -2.83325
   0.00000      0.90000         0.00000         2.77500        -2.75601
   0.00000      0.90000         0.00000         2.80000        -2.68046
   0.00000      0.90000         0.00000         2.82500        -2.60655
   0.00000      0.90000         0.00000         2.85000        -2.53423
   0.00000      0.90000         0.00000         2.87500        -2.46346
   0.00000      0.90000         0.00000         2.90000        -2.39417
   0.00000      0.90000         0.00000         2.92500        -2.32633
   0.00000      0.90000         0.00000         2.95000        -2.25990
   0.00000      0.90000         0.00000         2.97500        -2.19482
   0.00000      0.90000         0.00000         3.00000        -2.13107
   0.00000      0.90000         0.00000         3.02500        -2.06860
   0.00000      0.90000         0.00000         3.05000        -2.00736
   0.00000      0.90000         0.00000         3.07500        -1.94734
   0.00000      0.90000         0.00000         3.10000        -1.88849
   0.00000      0.90000         0.00000         3.12500        -1.83078
   0.00000      0.90000         0.00000         3.15000        -1.77418
   0.00000      0.90000         0.00000         3.17500        -1.71865
   0.00000      0.90000         0.00000         3.20000        -1.66417
   0.00000      0.90000         0.00000         3.22500        -1.61071
   0.00000      0.90000         0.00000         3.25000        -1.55824
   0.00000      0.90000         0.00000         3.27500        -1.50673
   0.00000      0.90000         0.00000         3.30000        -1.45616
   0.00000      0.90000         0.00000         3.32500        -1.40650
   0.00000      0.90000         0.00000         3.35000        -1.35774
   0.00000      0.90000         0.00000         3.37500        -1.30984
   0.00000      0.90000         0.00000         3.40000        -1.26278
   0.00000      0.90000         0.00000         3.42500        -1.21655
   0.00000      0.90000         0.00000         3.45000        -1.17111
   0.00000      0.90000         0.00000         3.47500        -1.12646
   0.00000      0.90000         0.00000         3.50000        -1.08258
   0.00000      0.90000         0.00000         3.52500        -1.03943
   0.00000      0.90000         0.00000         3.55000        -0.99701
   0.00000      0.90000         0.00000         3.57500        -0.95529
   0.00000      0.90000         0.00000         3.60000        -0.91427
   0.00000      0.90000         0.00000         3.62500        -0.87392
   0.00000      0.90000         0.00000         3.65000        -0.83423
   0.00000      0.90000         0.00000         3.67500        -0.79518
   0.00000      0.90000         0.00000         3.70000        -0.75676
   0.00000      0.90000         0.00000         3.72500        -0.71895
   0.00000      0.90000         0.00000         3.75000        -0.68173
   0.00000      0.90000         0.00000         3.77500        -0.64511
   0.00000      0.90000         0.00000         3.80000        -0.60905
   0.00000      0.90000         0.00000         3.82500        -0.57355
   0.00000      0.90000         0.00000         3.85000        -0.53860
   0.00000      0.90000         0.00000         3.87500        -0.50418
   0.00000      0.90000         0.00000         3.90000        -0.47029
   0.00000      0.90000         0.00000         3.92500        -0.43690
   0.00000      0.90000         0.00000         3.95000        -0.40402
   0.00000      0.90000         0.00000         3.97500        -0.37162
   0.00000      0.90000         0.00000         4.00000        -0.33970
   0.00000      0.90000         0.00000         4.02500        -0.30825
   0.00000      0.90000         0.00000         4.05000        -0.27726
   0.00000      0.90000         0.00000         4.07500        -0.24672
   0.00000      0.90000         0.00000         4.10000        -0.21662
   0.00000      0.90000         0.00000         4.12500        -0.18694
   0.00000      0.90000         0.00000         4.15000        -0.15769
   0.00000      0.90000         0.00000         4.17500        -0.12885
   0.00000      0.90000         0.00000         4.20000        -0.10041
   0.00000      0.90000         0.00000         4.22500        -0.07237
   0.00000      0.90000         0.00000         4.25000        -0.04472
   0.00000      0.90000         0.00000         4.27500        -0.01745
   0.00000      0.90000         0.00000         4.30000         0.00944
   0.00000      0.90000         0.00000         4.32500         0.03598
   0.00000      0.90000         0.00000         4.35000         0.06215
   0.00000      0.90000         0.00000         4.37500         0.08797
   0.00000      0.90000         0.00000         4.40000         0.11345
   0.00000      0.90000         0.00000         4.42500         0.13859
   0.00000      0.90000         0.00000         4.45000         0.16340
   0.00000      0.90000         0.00000         4.47500         0.18788
   0.00000      0.90000         0.00000         4.50000         0.21204
   0.00000      0.90000         0.00000         4.52500         0.23589
   0.00000      0.90000         0.00000         4.55000         0.25944
   0.00000      0.90000         0.00000         4.57500         0.28268
   0.00000      0.90000         0.00000         4.60000         0.30562
   0.00000      0.90000         0.00000         4.62500         0.32827
   0.00000      0.90000         0.00000         4.65000         0.35064
   0.00000      0.90000         0.00000         4.67500         0.37273
   0.00000      0.90000         0.00000         4.70000         0.39454
   0.00000      0.90000         0.00000         4.72500         0.41608
   0.00000      0.90000         0.00000         4.75000         0.43736
   0.00000      0.90000         0.00000         4.77500         0.45838
   0.00000      0.90000         0.00000         4.80000         0.47913
   0.00000      0.90000         0.00000         4.82500         0.49964
   0.00000      0.90000         0.00000         4.85000         0.51990
   0.00000      0.90000         0.00000         4.87500         0.53992
   0.00000      0.90000         0.00000         4.90000         0.55969
   0.00000      0.90000         0.00000         4.92500         0.57924
   0.00000      0.90000         0.00000         4.95000         0.59855
   0.00000      0.90000         1.00000         0.47500      -282.17529
   0.00000      0.90000         1.00000         0.50000      -222.14867
   0.00000      0.90000         1.00000         0.52500      -179.96445
   0.00000      0.90000         1.00000         0.55000      -149.26305
   0.00000      0.90000         1.00000         0.57500      -126.24187
   0.00000      0.90000         1.00000         0.60000      -108.53166
   0.00000      0.90000         1.00000         0.62500       -94.60221
   0.00000      0.90000         1.00000         0.65000       -83.43354
   0.00000      0.90000         1.00000         0.67500       -74.32653
   0.00000      0.90000         1.00000         0.70000       -66.78998
   0.00000      0.90000         1.00000         0.72500       -60.47103
   0.00000      0.90000         1.00000         0.75000       -55.11115
   0.00000      0.90000         1.00000         0.77500       -50.51747
   0.00000      0.90000         1.00000         0.80000       -46.54382
   0.00000      0.90000         1.00000         0.82500       -43.07773
   0.00000      0.90000         1.00000         0.85000       -40.03153
   0.00000      0.90000         1.00000         0.87500       -37.33603
   0.00000      0.90000         1.00000         0.90000       -34.93603
   0.00000      0.90000         1.00000         0.92500       -32.78700
   0.00000      0.90000         1.00000         0.95000       -30.85271
   0.00000      0.90000         1.00000         0.97500       -29.10343
   0.00000      0.90000         1.00000         1.00000       -27.51451
   0.00000      0.90000         1.00000         1.02500       -26.06544
   0.00000      0.90000         1.00000         1.05000       -24.73896
   0.00000      0.90000         1.00000         1.07500       -23.52050
   0.00000      0.90000         1.00000         1.10000       -22.39765
   0.00000      0.90000         1.00000         1.12500       -21.35981
   0.00000      0.90000         1.00000         1.15000       -20.39787
   0.00000      0.90000         1.00000         1.17500       -19.50394
   0.00000      0.90000         1.00000         1.20000       -18.67118
   0.00000      0.90000         1.00000         1.22500       -17.89363
   0.00000      0.90000         1.00000         1.25000       -17.16605
   0.00000      0.90000         1.00000         1.27500       -16.48385
   0.00000      0.90000         1.00000         1.30000       -15.84298
   0.00000      0.90000         1.00000         1.32500       -15.23985
   0.00000      0.90000         1.00000         1.35000       -14.67125
   0.00000      0.90000         1.00000         1.37500       -14.13435
   0.00000      0.90000         1.00000         1.40000       -13.62660
   0.00000      0.90000         1.00000         1.42500       -13.14572
   0.00000      0.90000         1.00000         1.45000       -12.68966
   0.00000      0.90000         1.00000         1.47500       -12.25657
   0.00000      0.90000         1.00000         1.50000       -11.84476
   0.00000      0.90000         1.00000         1.52500       -11.45274
   0.00000      0.90000         1.00000         1.55000       -11.07912
   0.00000      0.90000         1.00000         1.57500       -10.72266
   0.00000      0.90000         1.00000         1.60000       -10.38220
   0.00000      0.90000         1.00000         1.62500       -10.05671
   0.00000      0.90000         1.00000         1.65000        -9.74524
   0.00000      0.90000         1.00000         1.67500        -9.44689
   0.00000      0.90000         1.00000         1.70000        -9.16088
   0.00000      0.90000         1.00000         1.72500        -8.88646
   0.00000      0.90000         1.00000         1.75000        -8.62295
   0.00000      0.90000         1.00000         1.77500        -8.36971
   0.00000      0.90000         1.00000         1.80000        -8.12616
   0.00000      0.90000         1.00000         1.82500        -7.89177
   0.00000      0.90000         1.00000         1.85000        -7.66603
   0.00000      0.90000         1.00000         1.87500        -7.44847
   0.00000      0.90000         1.00000         1.90000        -7.23867
   0.00000      0.90000         1.00000         1.92500        -7.03622
   0.00000      0.90000         1.00000         1.95000        -6.84075
   0.00000      0.90000         1.00000         1.97500        -6.65190
   0.00000      0.90000         1.00000         2.00000        -6.46935
   0.00000      0.90000         1.00000         2.02500        -6.29279
   0.00000      0.90000         1.00000         2.05000        -6.12194
   0.00000      0.90000         1.00000         2.07500        -5.95652
   0.00000      0.90000         1.00000         2.10000        -5.79629
   0.00000      0.90000         1.00000         2.12500        -5.64100
   0.00000      0.90000         1.00000         2.15000        -5.49043
   0.00000      0.90000         1.00000         2.17500        -5.34438
   0.00000      0.90000         1.00000         2.20000        -5.20265
   0.00000      0.90000         1.00000         2.22500        -5.06505
   0.00000      0.90000         1.00000         2.25000        -4.93140
   0.00000      0.90000         1.00000         2.27500        -4.80154
   0.00000      0.90000         1.00000         2.30000        -4.67532
   0.00000      0.90000         1.00000         2.32500        -4.55258
   0.00000      0.90000         1.00000         2.35000        -4.43318
   0.00000      0.90000         1.00000         2.37500        -4.31699
   0.00000      0.90000         1.00000         2.40000        -4.20389
   0.00000      0.90000         1.00000         2.42500        -4.09375
   0.00000      0.90000         1.00000         2.45000        -3.98646
   0.00000      0.90000         1.00000         2.47500        -3.88192
   0.00000      0.90000         1.00000         2.50000        -3.78002
   0.00000      0.90000         1.00000         2.52500        -3.68067
   0.00000      0.90000         1.00000         2.55000        -3.58376
   0.00000      0.90000         1.00000         2.57500        -3.48922
   0.00000      0.90000         1.00000         2.60000        -3.39696
   0.00000      0.90000         1.00000         2.62500        -3.30690
   0.00000      0.90000         1.00000         2.65000        -3.21896
   0.00000      0.90000         1.00000         2.67500        -3.13307
   0.00000      0.90000         1.00000         2.70000        -3.04916
   0.00000      0.90000         1.00000         2.72500        -2.96717
   0.00000      0.90000         1.00000         2.75000        -2.88702
   0.00000      0.90000         1.00000         2.77500        -2.80867
   0.00000      0.90000         1.00000         2.80000        -2.73204
   0.00000      0.90000         1.00000         2.82500        -2.65709
   0.00000      0.90000         1.00000         2.85000        -2.58376
   0.00000      0.90000         1.00000         2.87500        -2.51201
   0.00000      0.90000         1.00000         2.90000        -2.44177
   0.00000      0.90000         1.00000         2.92500        -2.37301
   0.00000      0.90000         1.00000         2.95000        -2.30568
   0.00000      0.90000         1.00000         2.97500        -2.23974
   0.00000      0.90000         1.00000         3.00000        -2.17514
   0.00000      0.90000         1.00000         3.02500        -2.11185
   0.00000      0.90000         1.00000         3.05000        -2.04982
   0.00000      0.90000         1.00000         3.07500        -1.98902
   0.00000      0.90000         1.00000         3.10000        -1.92942
   0.00000      0.90000         1.00000         3.12500        -1.87098
   0.00000      0.90000         1.00000         3.15000        -1.81366
   0.00000      0.90000         1.00000         3.17500        -1.75744
   0.00000      0.90000         1.00000         3.20000        -1.70229
   0.00000      0.90000         1.00000         3.22500        -1.64817
   0.00000      0.90000         1.00000         3.25000        -1.59506
   0.00000      0.90000         1.00000         3.27500        -1.54293
   0.00000      0.90000         1.00000         3.30000        -1.49176
   0.00000      0.90000         1.00000         3.32500        -1.44151
   0.00000      0.90000         1.00000         3.35000        -1.39217
   0.00000      0.90000         1.00000         3.37500        -1.34371
   0.00000      0.90000         1.00000         3.40000        -1.29610
   0.00000      0.90000         1.00000         3.42500        -1.24934
   0.00000      0.90000         1.00000         3.45000        -1.20338
   0.00000      0.90000         1.00000         3.47500        -1.15822
   0.00000      0.90000         1.00000         3.50000        -1.11384
   0.00000      0.90000         1.00000         3.52500        -1.07021
   0.00000      0.90000         1.00000         3.55000        -1.02732
   0.00000      0.90000         1.00000         3.57500        -0.98514
   0.00000      0.90000         1.00000         3.60000        -0.94367
   0.00000      0.90000         1.00000         3.62500        -0.90288
   0.00000      0.90000         1.00000         3.65000        -0.86276
   0.00000      0.90000         1.00000         3.67500        -0.82329
   0.00000      0.90000         1.00000         3.70000        -0.78445
   0.00000      0.90000         1.00000         3.72500        -0.74624
   0.00000      0.90000         1.00000         3.75000        -0.70864
   0.00000      0.90000         1.00000         3.77500        -0.67163
   0.00000      0.90000         1.00000         3.80000        -0.63519
   0.00000      0.90000         1.00000         3.82500        -0.59933
   0.00000      0.90000         1.00000         3.85000        -0.56402
   0.00000      0.90000         1.00000         3.87500        -0.52925
   0.00000      0.90000         1.00000         3.90000        -0.49501
   0.00000      0.90000         1.00000         3.92500        -0.46129
   0.00000      0.90000         1.00000         3.95000        -0.42807
   0.00000      0.90000         1.00000         3.97500        -0.39535
   0.00000      0.90000         1.00000         4.00000        -0.36312
   0.00000      0.90000         1.00000         4.02500        -0.33136
   0.00000      0.90000         1.00000         4.05000        -0.30006
   0.00000      0.90000         1.00000         4.07500        -0.26922
   0.00000      0.90000         1.00000         4.10000        -0.23883
   0.00000      0.90000         1.00000         4.12500        -0.20887
   0.00000      0.90000         1.00000         4.15000        -0.17934
   0.00000      0.90000         1.00000         4.17500        -0.15022
   0.00000      0.90000         1.00000         4.20000        -0.12152
   0.00000      0.90000         1.00000         4.22500        -0.09321
   0.00000      0.90000         1.00000         4.25000        -0.06530
   0.00000      0.90000         1.00000         4.27500        -0.03778
   0.00000      0.90000         1.00000         4.30000        -0.01063
   0.00000      0.90000         1.00000         4.32500         0.01614
   0.00000      0.90000         1.00000         4.35000         0.04256
   0.00000      0.90000         1.00000         4.37500         0.06861
   0.00000      0.90000         1.00000         4.40000         0.09432
   0.00000      0.90000         1.00000         4.42500         0.11969
   0.00000      0.90000         1.00000         4.45000         0.14472
   0.00000      0.90000         1.00000         4.47500         0.16942
   0.00000      0.90000         1.00000         4.50000         0.19380
   0.00000      0.90000         1.00000         4.52500         0.21786
   0.00000      0.90000         1.00000         4.55000         0.24161
   0.00000      0.90000         1.00000         4.57500         0.26505
   0.00000      0.90000         1.00000         4.60000         0.28820
   0.00000      0.90000         1.00000         4.62500         0.31105
   0.00000      0.90000         1.00000         4.65000         0.33361
   0.00000      0.90000         1.00000         4.67500         0.35588
   0.00000      0.90000         1.00000         4.70000         0.37788
   0.00000      0.90000         1.00000         4.72500         0.39961
   0.00000      0.90000         1.00000         4.75000         0.42106
   0.00000      0.90000         1.00000         4.77500         0.44226
   0.00000      0.90000         1.00000         4.80000         0.46319
   0.00000      0.90000         1.00000         4.82500         0.48387
   0.00000      0.90000         1.00000         4.85000         0.50429
   0.00000      0.90000         1.00000         4.87500         0.52448
   0.00000      0.90000         1.00000         4.90000         0.54442
   0.00000      0.90000         1.00000         4.92500         0.56412
   0.00000      0.90000         1.00000         4.95000         0.58359
   0.00000      0.90000         1.00000         4.97500         0.60283
   0.00000      0.90000         1.00000         5.00000         0.62184
   0.00000      0.90000         1.00000         5.02500         0.64063
   0.00000      0.90000         2.00000         0.52500      -256.02033
   0.00000      0.90000         2.00000         0.55000      -204.55120
   0.00000      0.90000         2.00000         0.57500      -167.63908
   0.00000      0.90000         2.00000         0.60000      -140.33040
   0.00000      0.90000         2.00000         0.62500      -119.57664
   0.00000      0.90000         2.00000         0.65000      -103.43253
   0.00000      0.90000         2.00000         0.67500       -90.61637
   0.00000      0.90000         2.00000         0.70000       -80.25934
   0.00000      0.90000         2.00000         0.72500       -71.75738
   0.00000      0.90000         2.00000         0.75000       -64.68082
   0.00000      0.90000         2.00000         0.77500       -58.71775
   0.00000      0.90000         2.00000         0.80000       -53.63752
   0.00000      0.90000         2.00000         0.82500       -49.26668
   0.00000      0.90000         2.00000         0.85000       -45.47284
   0.00000      0.90000         2.00000         0.87500       -42.15348
   0.00000      0.90000         2.00000         0.90000       -39.22826
   0.00000      0.90000         2.00000         0.92500       -36.63343
   0.00000      0.90000         2.00000         0.95000       -34.31791
   0.00000      0.90000         2.00000         0.97500       -32.24034
   0.00000      0.90000         2.00000         1.00000       -30.36692
   0.00000      0.90000         2.00000         1.02500       -28.66982
   0.00000      0.90000         2.00000         1.05000       -27.12592
   0.00000      0.90000         2.00000         1.07500       -25.71589
   0.00000      0.90000         2.00000         1.10000       -24.42345
   0.00000      0.90000         2.00000         1.12500       -23.23481
   0.00000      0.90000         2.00000         1.15000       -22.13821
   0.00000      0.90000         2.00000         1.17500       -21.12357
   0.00000      0.90000         2.00000         1.20000       -20.18221
   0.00000      0.90000         2.00000         1.22500       -19.30660
   0.00000      0.90000         2.00000         1.25000       -18.49022
   0.00000      0.90000         2.00000         1.27500       -17.72734
   0.00000      0.90000         2.00000         1.30000       -17.01296
   0.00000      0.90000         2.00000         1.32500       -16.34266
   0.00000      0.90000         2.00000         1.35000       -15.71255
   0.00000      0.90000         2.00000         1.37500       -15.11917
   0.00000      0.90000         2.00000         1.40000       -14.55943
   0.00000      0.90000         2.00000         1.42500       -14.03060
   0.00000      0.90000         2.00000         1.45000       -13.53022
   0.00000      0.90000         2.00000         1.47500       -13.05608
   0.00000      0.90000         2.00000         1.50000       -12.60620
   0.00000      0.90000         2.00000         1.52500       -12.17877
   0.00000      0.90000         2.00000         1.55000       -11.77219
   0.00000      0.90000         2.00000         1.57500       -11.38497
   0.00000      0.90000         2.00000         1.60000       -11.01579
   0.00000      0.90000         2.00000         1.62500       -10.66343
   0.00000      0.90000         2.00000         1.65000       -10.32677
   0.00000      0.90000         2.00000         1.67500       -10.00480
   0.00000      0.90000         2.00000         1.70000        -9.69659
   0.00000      0.90000         2.00000         1.72500        -9.40128
   0.00000      0.90000         2.00000         1.75000        -9.11810
   0.00000      0.90000         2.00000         1.77500        -8.84631
   0.00000      0.90000         2.00000         1.80000        -8.58525
   0.00000      0.90000         2.00000         1.82500        -8.33431
   0.00000      0.90000         2.00000         1.85000        -8.09291
   0.00000      0.90000         2.00000         1.87500        -7.86053
   0.00000      0.90000         2.00000         1.90000        -7.63667
   0.00000      0.90000         2.00000         1.92500        -7.42088
   0.00000      0.90000         2.00000         1.95000        -7.21274
   0.00000      0.90000         2.00000         1.97500        -7.01184
   0.00000      0.90000         2.00000         2.00000        -6.81784
   0.00000      0.90000         2.00000         2.02500        -6.63036
   0.00000      0.90000         2.00000         2.05000        -6.44911
   0.00000      0.90000         2.00000         2.07500        -6.27378
   0.00000      0.90000         2.00000         2.10000        -6.10408
   0.00000      0.90000         2.00000         2.12500        -5.93975
   0.00000      0.90000         2.00000         2.15000        -5.78054
   0.00000      0.90000         2.00000         2.17500        -5.62623
   0.00000      0.90000         2.00000         2.20000        -5.47658
   0.00000      0.90000         2.00000         2.22500        -5.33140
   0.00000      0.90000         2.00000         2.25000        -5.19050
   0.00000      0.90000         2.00000         2.27500        -5.05367
   0.00000      0.90000         2.00000         2.30000        -4.92077
   0.00000      0.90000         2.00000         2.32500        -4.79161
   0.00000      0.90000         2.00000         2.35000        -4.66605
   0.00000      0.90000         2.00000         2.37500        -4.54394
   0.00000      0.90000         2.00000         2.40000        -4.42514
   0.00000      0.90000         2.00000         2.42500        -4.30953
   0.00000      0.90000         2.00000         2.45000        -4.19697
   0.00000      0.90000         2.00000         2.47500        -4.08735
   0.00000      0.90000         2.00000         2.50000        -3.98055
   0.00000      0.90000         2.00000         2.52500        -3.87648
   0.00000      0.90000         2.00000         2.55000        -3.77503
   0.00000      0.90000         2.00000         2.57500        -3.67610
   0.00000      0.90000         2.00000         2.60000        -3.57960
   0.00000      0.90000         2.00000         2.62500        -3.48544
   0.00000      0.90000         2.00000         2.65000        -3.39355
   0.00000      0.90000         2.00000         2.67500        -3.30384
   0.00000      0.90000         2.00000         2.70000        -3.21624
   0.00000      0.90000         2.00000         2.72500        -3.13067
   0.00000      0.90000         2.00000         2.75000        -3.04707
   0.00000      0.90000         2.00000         2.77500        -2.96536
   0.00000      0.90000         2.00000         2.80000        -2.88550
   0.00000      0.90000         2.00000         2.82500        -2.80741
   0.00000      0.90000         2.00000         2.85000        -2.73104
   0.00000      0.90000         2.00000         2.87500        -2.65634
   0.00000      0.90000         2.00000         2.90000        -2.58324
   0.00000      0.90000         2.00000         2.92500        -2.51171
   0.00000      0.90000         2.00000         2.95000        -2.44169
   0.00000      0.90000         2.00000         2.97500        -2.37313
   0.00000      0.90000         2.00000         3.00000        -2.30600
   0.00000      0.90000         2.00000         3.02500        -2.24024
   0.00000      0.90000         2.00000         3.05000        -2.17583
   0.00000      0.90000         2.00000         3.07500        -2.11270
   0.00000      0.90000         2.00000         3.10000        -2.05084
   0.00000      0.90000         2.00000         3.12500        -1.99020
   0.00000      0.90000         2.00000         3.15000        -1.93075
   0.00000      0.90000         2.00000         3.17500        -1.87246
   0.00000      0.90000         2.00000         3.20000        -1.81528
   0.00000      0.90000         2.00000         3.22500        -1.75920
   0.00000      0.90000         2.00000         3.25000        -1.70417
   0.00000      0.90000         2.00000         3.27500        -1.65018
   0.00000      0.90000         2.00000         3.30000        -1.59718
   0.00000      0.90000         2.00000         3.32500        -1.54517
   0.00000      0.90000         2.00000         3.35000        -1.49410
   0.00000      0.90000         2.00000         3.37500        -1.44396
   0.00000      0.90000         2.00000         3.40000        -1.39472
   0.00000      0.90000         2.00000         3.42500        -1.34635
   0.00000      0.90000         2.00000         3.45000        -1.29884
   0.00000      0.90000         2.00000         3.47500        -1.25216
   0.00000      0.90000         2.00000         3.50000        -1.20629
   0.00000      0.90000         2.00000         3.52500        -1.16121
   0.00000      0.90000         2.00000         3.55000        -1.11691
   0.00000      0.90000         2.00000         3.57500        -1.07335
   0.00000      0.90000         2.00000         3.60000        -1.03053
   0.00000      0.90000         2.00000         3.62500        -0.98842
   0.00000      0.90000         2.00000         3.65000        -0.94702
   0.00000      0.90000         2.00000         3.67500        -0.90629
   0.00000      0.90000         2.00000         3.70000        -0.86623
   0.00000      0.90000         2.00000         3.72500        -0.82682
   0.00000      0.90000         2.00000         3.75000        -0.78804
   0.00000      0.90000         2.00000         3.77500        -0.74988
   0.00000      0.90000         2.00000         3.80000        -0.71233
   0.00000      0.90000         2.00000         3.82500        -0.67536
   0.00000      0.90000         2.00000         3.85000        -0.63898
   0.00000      0.90000         2.00000         3.87500        -0.60316
   0.00000      0.90000         2.00000         3.90000        -0.56789
   0.00000      0.90000         2.00000         3.92500        -0.53316
   0.00000      0.90000         2.00000         3.95000        -0.49896
   0.00000      0.90000         2.00000         3.97500        -0.46528
   0.00000      0.90000         2.00000         4.00000        -0.43210
   0.00000      0.90000         2.00000         4.02500        -0.39942
   0.00000      0.90000         2.00000         4.05000        -0.36722
   0.00000      0.90000         2.00000         4.07500        -0.33549
   0.00000      0.90000         2.00000         4.10000        -0.30422
   0.00000      0.90000         2.00000         4.12500        -0.27341
   0.00000      0.90000         2.00000         4.15000        -0.24304
   0.00000      0.90000         2.00000         4.17500        -0.21311
   0.00000      0.90000         2.00000         4.20000        -0.18360
   0.00000      0.90000         2.00000         4.22500        -0.15451
   0.00000      0.90000         2.00000         4.25000        -0.12583
   0.00000      0.90000         2.00000         4.27500        -0.09755
   0.00000      0.90000         2.00000         4.30000        -0.06966
   0.00000      0.90000         2.00000         4.32500        -0.04216
   0.00000      0.90000         2.00000         4.35000        -0.01503
   0.00000      0.90000         2.00000         4.37500         0.01173
   0.00000      0.90000         2.00000         4.40000         0.03813
   0.00000      0.90000         2.00000         4.42500         0.06417
   0.00000      0.90000         2.00000         4.45000         0.08986
   0.00000      0.90000         2.00000         4.47500         0.11521
   0.00000      0.90000         2.00000         4.50000         0.14023
   0.00000      0.90000         2.00000         4.52500         0.16492
   0.00000      0.90000         2.00000         4.55000         0.18928
   0.00000      0.90000         2.00000         4.57500         0.21333
   0.00000      0.90000         2.00000         4.60000         0.23707
   0.00000      0.90000         2.00000         4.62500         0.26051
   0.00000      0.90000         2.00000         4.65000         0.28364
   0.00000      0.90000         2.00000         4.67500         0.30648
   0.00000      0.90000         2.00000         4.70000         0.32904
   0.00000      0.90000         2.00000         4.72500         0.35131
   0.00000      0.90000         2.00000         4.75000         0.37330
   0.00000      0.90000         2.00000         4.77500         0.39502
   0.00000      0.90000         2.00000         4.80000         0.41647
   0.00000      0.90000         2.00000         4.82500         0.43765
   0.00000      0.90000         2.00000         4.85000         0.45858
   0.00000      0.90000         2.00000         4.87500         0.47925
   0.00000      0.90000         2.00000         4.90000         0.49968
   0.00000      0.90000         2.00000         4.92500         0.51986
   0.00000      0.90000         2.00000         4.95000         0.53979
   0.00000      0.90000         2.00000         4.97500         0.55949
   0.00000      0.90000         2.00000         5.00000         0.57896
   0.00000      0.90000         2.00000         5.02500         0.59820
   0.00000      0.90000         2.00000         5.05000         0.61721
   0.00000      0.90000         2.00000         5.07500         0.63600
   0.00000      0.90000         2.00000         5.10000         0.65457
   0.00000      0.90000         2.00000         5.12500         0.67293
   0.00000      0.90000         2.00000         5.15000         0.69108
   0.00000      0.90000         3.00000         0.60000      -215.66216
   0.00000      0.90000         3.00000         0.62500      -176.82658
   0.00000      0.90000         3.00000         0.65000      -147.96411
   0.00000      0.90000         3.00000         0.67500      -125.96803
   0.00000      0.90000         3.00000         0.70000      -108.83113
   0.00000      0.90000         3.00000         0.72500       -95.21817
   0.00000      0.90000         3.00000         0.75000       -84.21730
   0.00000      0.90000         3.00000         0.77500       -75.19092
   0.00000      0.90000         3.00000         0.80000       -67.68360
   0.00000      0.90000         3.00000         0.82500       -61.36370
   0.00000      0.90000         3.00000         0.85000       -55.98539
   0.00000      0.90000         3.00000         0.87500       -51.36356
   0.00000      0.90000         3.00000         0.90000       -47.35674
   0.00000      0.90000         3.00000         0.92500       -43.85534
   0.00000      0.90000         3.00000         0.95000       -40.77346
   0.00000      0.90000         3.00000         0.97500       -38.04295
   0.00000      0.90000         3.00000         1.00000       -35.60920
   0.00000      0.90000         3.00000         1.02500       -33.42801
   0.00000      0.90000         3.00000         1.05000       -31.46330
   0.00000      0.90000         3.00000         1.07500       -29.68538
   0.00000      0.90000         3.00000         1.10000       -28.06958
   0.00000      0.90000         3.00000         1.12500       -26.59531
   0.00000      0.90000         3.00000         1.15000       -25.24525
   0.00000      0.90000         3.00000         1.17500       -24.00470
   0.00000      0.90000         3.00000         1.20000       -22.86119
   0.00000      0.90000         3.00000         1.22500       -21.80400
   0.00000      0.90000         3.00000         1.25000       -20.82392
   0.00000      0.90000         3.00000         1.27500       -19.91298
   0.00000      0.90000         3.00000         1.30000       -19.06425
   0.00000      0.90000         3.00000         1.32500       -18.27169
   0.00000      0.90000         3.00000         1.35000       -17.53000
   0.00000      0.90000         3.00000         1.37500       -16.83452
   0.00000      0.90000         3.00000         1.40000       -16.18112
   0.00000      0.90000         3.00000         1.42500       -15.56617
   0.00000      0.90000         3.00000         1.45000       -14.98641
   0.00000      0.90000         3.00000         1.47500       -14.43896
   0.00000      0.90000         3.00000         1.50000       -13.92122
   0.00000      0.90000         3.00000         1.52500       -13.43087
   0.00000      0.90000         3.00000         1.55000       -12.96583
   0.00000      0.90000         3.00000         1.57500       -12.52421
   0.00000      0.90000         3.00000         1.60000       -12.10431
   0.00000      0.90000         3.00000         1.62500       -11.70458
   0.00000      0.90000         3.00000         1.65000       -11.32363
   0.00000      0.90000         3.00000         1.67500       -10.96018
   0.00000      0.90000         3.00000         1.70000       -10.61306
   0.00000      0.90000         3.00000         1.72500       -10.28121
   0.00000      0.90000         3.00000         1.75000        -9.96366
   0.00000      0.90000         3.00000         1.77500        -9.65951
   0.00000      0.90000         3.00000         1.80000        -9.36795
   0.00000      0.90000         3.00000         1.82500        -9.08821
   0.00000      0.90000         3.00000         1.85000        -8.81960
   0.00000      0.90000         3.00000         1.87500        -8.56148
   0.00000      0.90000         3.00000         1.90000        -8.31326
   0.00000      0.90000         3.00000         1.92500        -8.07437
   0.00000      0.90000         3.00000         1.95000        -7.84431
   0.00000      0.90000         3.00000         1.97500        -7.62261
   0.00000      0.90000         3.00000         2.00000        -7.40882
   0.00000      0.90000         3.00000         2.02500        -7.20253
   0.00000      0.90000         3.00000         2.05000        -7.00336
   0.00000      0.90000         3.00000         2.07500        -6.81095
   0.00000      0.90000         3.00000         2.10000        -6.62497
   0.00000      0.90000         3.00000         2.12500        -6.44510
   0.00000      0.90000         3.00000         2.15000        -6.27106
   0.00000      0.90000         3.00000         2.17500        -6.10256
   0.00000      0.90000         3.00000         2.20000        -5.93935
   0.00000      0.90000         3.00000         2.22500        -5.78119
   0.00000      0.90000         3.00000         2.25000        -5.62785
   0.00000      0.90000         3.00000         2.27500        -5.47911
   0.00000      0.90000         3.00000         2.30000        -5.33478
   0.00000      0.90000         3.00000         2.32500        -5.19466
   0.00000      0.90000         3.00000         2.35000        -5.05858
   0.00000      0.90000         3.00000         2.37500        -4.92636
   0.00000      0.90000         3.00000         2.40000        -4.79785
   0.00000      0.90000         3.00000         2.42500        -4.67289
   0.00000      0.90000         3.00000         2.45000        -4.55135
   0.00000      0.90000         3.00000         2.47500        -4.43307
   0.00000      0.90000         3.00000         2.50000        -4.31795
   0.00000      0.90000         3.00000         2.52500        -4.20585
   0.00000      0.90000         3.00000         2.55000        -4.09665
   0.00000      0.90000         3.00000         2.57500        -3.99026
   0.00000      0.90000         3.00000         2.60000        -3.88656
   0.00000      0.90000         3.00000         2.62500        -3.78545
   0.00000      0.90000         3.00000         2.65000        -3.68685
   0.00000      0.90000         3.00000         2.67500        -3.59065
   0.00000      0.90000         3.00000         2.70000        -3.49678
   0.00000      0.90000         3.00000         2.72500        -3.40515
   0.00000      0.90000         3.00000         2.75000        -3.31568
   0.00000      0.90000         3.00000         2.77500        -3.22831
   0.00000      0.90000         3.00000         2.80000        -3.14295
   0.00000      0.90000         3.00000         2.82500        -3.05955
   0.00000      0.90000         3.00000         2.85000        -2.97803
   0.00000      0.90000         3.00000         2.87500        -2.89833
   0.00000      0.90000         3.00000         2.90000        -2.82040
   0.00000      0.90000         3.00000         2.92500        -2.74418
   0.00000      0.90000         3.00000         2.95000        -2.66961
   0.00000      0.90000         3.00000         2.97500        -2.59664
   0.00000      0.90000         3.00000         3.00000        -2.52522
   0.00000      0.90000         3.00000         3.02500        -2.45530
   0.00000      0.90000         3.00000         3.05000        -2.38684
   0.00000      0.90000         3.00000         3.07500        -2.31980
   0.00000      0.90000         3.00000         3.10000        -2.25412
   0.00000      0.90000         3.00000         3.12500        -2.18977
   0.00000      0.90000         3.00000         3.15000        -2.12672
   0.00000      0.90000         3.00000         3.17500        -2.06492
   0.00000      0.90000         3.00000         3.20000        -2.00433
   0.00000      0.90000         3.00000         3.22500        -1.94493
   0.00000      0.90000         3.00000         3.25000        -1.88667
   0.00000      0.90000         3.00000         3.27500        -1.82953
   0.00000      0.90000         3.00000         3.30000        -1.77348
   0.00000      0.90000         3.00000         3.32500        -1.71848
   0.00000      0.90000         3.00000         3.35000        -1.66451
   0.00000      0.90000         3.00000         3.37500        -1.61153
   0.00000      0.90000         3.00000         3.40000        -1.55953
   0.00000      0.90000         3.00000         3.42500        -1.50847
   0.00000      0.90000         3.00000         3.45000        -1.45834
   0.00000      0.90000         3.00000         3.47500        -1.40910
   0.00000      0.90000         3.00000         3.50000        -1.36074
   0.00000      0.90000         3.00000         3.52500        -1.31322
   0.00000      0.90000         3.00000         3.55000        -1.26654
   0.00000      0.90000         3.00000         3.57500        -1.22066
   0.00000      0.90000         3.00000         3.60000        -1.17557
   0.00000      0.90000         3.00000         3.62500        -1.13125
   0.00000      0.90000         3.00000         3.65000        -1.08768
   0.00000      0.90000         3.00000         3.67500        -1.04485
   0.00000      0.90000         3.00000         3.70000        -1.00272
   0.00000      0.90000         3.00000         3.72500        -0.96129
   0.00000      0.90000         3.00000         3.75000        -0.92054
   0.00000      0.90000         3.00000         3.77500        -0.88046
   0.00000      0.90000         3.00000         3.80000        -0.84102
   0.00000      0.90000         3.00000         3.82500        -0.80221
   0.00000      0.90000         3.00000         3.85000        -0.76403
   0.00000      0.90000         3.00000         3.87500        -0.72644
   0.00000      0.90000         3.00000         3.90000        -0.68945
   0.00000      0.90000         3.00000         3.92500        -0.65303
   0.00000      0.90000         3.00000         3.95000        -0.61718
   0.00000      0.90000         3.00000         3.97500        -0.58188
   0.00000      0.90000         3.00000         4.00000        -0.54711
   0.00000      0.90000         3.00000         4.02500        -0.51288
   0.00000      0.90000         3.00000         4.05000        -0.47916
   0.00000      0.90000         3.00000         4.07500        -0.44594
   0.00000      0.90000         3.00000         4.10000        -0.41322
   0.00000      0.90000         3.00000         4.12500        -0.38098
   0.00000      0.90000         3.00000         4.15000        -0.34921
   0.00000      0.90000         3.00000         4.17500        -0.31790
   0.00000      0.90000         3.00000         4.20000        -0.28705
   0.00000      0.90000         3.00000         4.22500        -0.25664
   0.00000      0.90000         3.00000         4.25000        -0.22666
   0.00000      0.90000         3.00000         4.27500        -0.19711
   0.00000      0.90000         3.00000         4.30000        -0.16798
   0.00000      0.90000         3.00000         4.32500        -0.13926
   0.00000      0.90000         3.00000         4.35000        -0.11093
   0.00000      0.90000         3.00000         4.37500        -0.08300
   0.00000      0.90000         3.00000         4.40000        -0.05545
   0.00000      0.90000         3.00000         4.42500        -0.02828
   0.00000      0.90000         3.00000         4.45000        -0.00147
   0.00000      0.90000         3.00000         4.47500         0.02497
   0.00000      0.90000         3.00000         4.50000         0.05106
   0.00000      0.90000         3.00000         4.52500         0.07680
   0.00000      0.90000         3.00000         4.55000         0.10219
   0.00000      0.90000         3.00000         4.57500         0.12726
   0.00000      0.90000         3.00000         4.60000         0.15199
   0.00000      0.90000         3.00000         4.62500         0.17640
   0.00000      0.90000         3.00000         4.65000         0.20050
   0.00000      0.90000         3.00000         4.67500         0.22428
   0.00000      0.90000         3.00000         4.70000         0.24776
   0.00000      0.90000         3.00000         4.72500         0.27094
   0.00000      0.90000         3.00000         4.75000         0.29383
   0.00000      0.90000         3.00000         4.77500         0.31643
   0.00000      0.90000         3.00000         4.80000         0.33875
   0.00000      0.90000         3.00000         4.82500         0.36078
   0.00000      0.90000         3.00000         4.85000         0.38255
   0.00000      0.90000         3.00000         4.87500         0.40405
   0.00000      0.90000         3.00000         4.90000         0.42528
   0.00000      0.90000         3.00000         4.92500         0.44625
   0.00000      0.90000         3.00000         4.95000         0.46697
   0.00000      0.90000         3.00000         4.97500         0.48744
   0.00000      0.90000         3.00000         5.00000         0.50767
   0.00000      0.90000         3.00000         5.02500         0.52765
   0.00000      0.90000         3.00000         5.05000         0.54740
   0.00000      0.90000         3.00000         5.07500         0.56691
   0.00000      0.90000         3.00000         5.10000         0.58619
   0.00000      0.90000         3.00000         5.12500         0.60525
   0.00000      0.90000         3.00000         5.15000         0.62408
   0.00000      0.90000         3.00000         5.17500         0.64270
   0.00000      0.90000         3.00000         5.20000         0.66110
   0.00000      0.90000         3.00000         5.22500         0.67930
   0.00000      0.90000         3.00000         5.25000         0.69728
   0.00000      0.90000         3.00000         5.27500         0.71506
   0.00000      0.90000         3.00000         5.30000         0.73264
   0.00000      0.90000         4.00000         0.70000      -166.66598
   0.00000      0.90000         4.00000         0.72500      -141.31262
   0.00000      0.90000         4.00000         0.75000      -121.58648
   0.00000      0.90000         4.00000         0.77500      -105.94968
   0.00000      0.90000         4.00000         0.80000       -93.34653
   0.00000      0.90000         4.00000         0.82500       -83.03615
   0.00000      0.90000         4.00000         0.85000       -74.48811
   0.00000      0.90000         4.00000         0.87500       -67.31562
   0.00000      0.90000         4.00000         0.90000       -61.23189
   0.00000      0.90000         4.00000         0.92500       -56.02098
   0.00000      0.90000         4.00000         0.95000       -51.51795
   0.00000      0.90000         4.00000         0.97500       -47.59523
   0.00000      0.90000         4.00000         1.00000       -44.15293
   0.00000      0.90000         4.00000         1.02500       -41.11194
   0.00000      0.90000         4.00000         1.05000       -38.40900
   0.00000      0.90000         4.00000         1.07500       -35.99301
   0.00000      0.90000         4.00000         1.10000       -33.82235
   0.00000      0.90000         4.00000         1.12500       -31.86281
   0.00000      0.90000         4.00000         1.15000       -30.08608
   0.00000      0.90000         4.00000         1.17500       -28.46855
   0.00000      0.90000         4.00000         1.20000       -26.99040
   0.00000      0.90000         4.00000         1.22500       -25.63488
   0.00000      0.90000         4.00000         1.25000       -24.38777
   0.00000      0.90000         4.00000         1.27500       -23.23690
   0.00000      0.90000         4.00000         1.30000       -22.17182
   0.00000      0.90000         4.00000         1.32500       -21.18352
   0.00000      0.90000         4.00000         1.35000       -20.26417
   0.00000      0.90000         4.00000         1.37500       -19.40696
   0.00000      0.90000         4.00000         1.40000       -18.60592
   0.00000      0.90000         4.00000         1.42500       -17.85583
   0.00000      0.90000         4.00000         1.45000       -17.15207
   0.00000      0.90000         4.00000         1.47500       -16.49055
   0.00000      0.90000         4.00000         1.50000       -15.86766
   0.00000      0.90000         4.00000         1.52500       -15.28016
   0.00000      0.90000         4.00000         1.55000       -14.72517
   0.00000      0.90000         4.00000         1.57500       -14.20012
   0.00000      0.90000         4.00000         1.60000       -13.70268
   0.00000      0.90000         4.00000         1.62500       -13.23076
   0.00000      0.90000         4.00000         1.65000       -12.78249
   0.00000      0.90000         4.00000         1.67500       -12.35616
   0.00000      0.90000         4.00000         1.70000       -11.95021
   0.00000      0.90000         4.00000         1.72500       -11.56325
   0.00000      0.90000         4.00000         1.75000       -11.19398
   0.00000      0.90000         4.00000         1.77500       -10.84125
   0.00000      0.90000         4.00000         1.80000       -10.50398
   0.00000      0.90000         4.00000         1.82500       -10.18119
   0.00000      0.90000         4.00000         1.85000        -9.87198
   0.00000      0.90000         4.00000         1.87500        -9.57553
   0.00000      0.90000         4.00000         1.90000        -9.29106
   0.00000      0.90000         4.00000         1.92500        -9.01789
   0.00000      0.90000         4.00000         1.95000        -8.75536
   0.00000      0.90000         4.00000         1.97500        -8.50286
   0.00000      0.90000         4.00000         2.00000        -8.25985
   0.00000      0.90000         4.00000         2.02500        -8.02580
   0.00000      0.90000         4.00000         2.05000        -7.80024
   0.00000      0.90000         4.00000         2.07500        -7.58271
   0.00000      0.90000         4.00000         2.10000        -7.37281
   0.00000      0.90000         4.00000         2.12500        -7.17014
   0.00000      0.90000         4.00000         2.15000        -6.97434
   0.00000      0.90000         4.00000         2.17500        -6.78507
   0.00000      0.90000         4.00000         2.20000        -6.60202
   0.00000      0.90000         4.00000         2.22500        -6.42489
   0.00000      0.90000         4.00000         2.25000        -6.25341
   0.00000      0.90000         4.00000         2.27500        -6.08730
   0.00000      0.90000         4.00000         2.30000        -5.92632
   0.00000      0.90000         4.00000         2.32500        -5.77025
   0.00000      0.90000         4.00000         2.35000        -5.61887
   0.00000      0.90000         4.00000         2.37500        -5.47197
   0.00000      0.90000         4.00000         2.40000        -5.32935
   0.00000      0.90000         4.00000         2.42500        -5.19084
   0.00000      0.90000         4.00000         2.45000        -5.05627
   0.00000      0.90000         4.00000         2.47500        -4.92547
   0.00000      0.90000         4.00000         2.50000        -4.79828
   0.00000      0.90000         4.00000         2.52500        -4.67457
   0.00000      0.90000         4.00000         2.55000        -4.55419
   0.00000      0.90000         4.00000         2.57500        -4.43702
   0.00000      0.90000         4.00000         2.60000        -4.32292
   0.00000      0.90000         4.00000         2.62500        -4.21179
   0.00000      0.90000         4.00000         2.65000        -4.10350
   0.00000      0.90000         4.00000         2.67500        -3.99796
   0.00000      0.90000         4.00000         2.70000        -3.89507
   0.00000      0.90000         4.00000         2.72500        -3.79471
   0.00000      0.90000         4.00000         2.75000        -3.69682
   0.00000      0.90000         4.00000         2.77500        -3.60129
   0.00000      0.90000         4.00000         2.80000        -3.50804
   0.00000      0.90000         4.00000         2.82500        -3.41700
   0.00000      0.90000         4.00000         2.85000        -3.32808
   0.00000      0.90000         4.00000         2.87500        -3.24123
   0.00000      0.90000         4.00000         2.90000        -3.15636
   0.00000      0.90000         4.00000         2.92500        -3.07341
   0.00000      0.90000         4.00000         2.95000        -2.99232
   0.00000      0.90000         4.00000         2.97500        -2.91302
   0.00000      0.90000         4.00000         3.00000        -2.83547
   0.00000      0.90000         4.00000         3.02500        -2.75960
   0.00000      0.90000         4.00000         3.05000        -2.68536
   0.00000      0.90000         4.00000         3.07500        -2.61270
   0.00000      0.90000         4.00000         3.10000        -2.54157
   0.00000      0.90000         4.00000         3.12500        -2.47193
   0.00000      0.90000         4.00000         3.15000        -2.40372
   0.00000      0.90000         4.00000         3.17500        -2.33691
   0.00000      0.90000         4.00000         3.20000        -2.27146
   0.00000      0.90000         4.00000         3.22500        -2.20732
   0.00000      0.90000         4.00000         3.25000        -2.14445
   0.00000      0.90000         4.00000         3.27500        -2.08283
   0.00000      0.90000         4.00000         3.30000        -2.02241
   0.00000      0.90000         4.00000         3.32500        -1.96316
   0.00000      0.90000         4.00000         3.35000        -1.90504
   0.00000      0.90000         4.00000         3.37500        -1.84804
   0.00000      0.90000         4.00000         3.40000        -1.79210
   0.00000      0.90000         4.00000         3.42500        -1.73721
   0.00000      0.90000         4.00000         3.45000        -1.68334
   0.00000      0.90000         4.00000         3.47500        -1.63046
   0.00000      0.90000         4.00000         3.50000        -1.57855
   0.00000      0.90000         4.00000         3.52500        -1.52757
   0.00000      0.90000         4.00000         3.55000        -1.47750
   0.00000      0.90000         4.00000         3.57500        -1.42832
   0.00000      0.90000         4.00000         3.60000        -1.38001
   0.00000      0.90000         4.00000         3.62500        -1.33255
   0.00000      0.90000         4.00000         3.65000        -1.28591
   0.00000      0.90000         4.00000         3.67500        -1.24007
   0.00000      0.90000         4.00000         3.70000        -1.19501
   0.00000      0.90000         4.00000         3.72500        -1.15072
   0.00000      0.90000         4.00000         3.75000        -1.10717
   0.00000      0.90000         4.00000         3.77500        -1.06435
   0.00000      0.90000         4.00000         3.80000        -1.02224
   0.00000      0.90000         4.00000         3.82500        -0.98082
   0.00000      0.90000         4.00000         3.85000        -0.94007
   0.00000      0.90000         4.00000         3.87500        -0.89999
   0.00000      0.90000         4.00000         3.90000        -0.86055
   0.00000      0.90000         4.00000         3.92500        -0.82174
   0.00000      0.90000         4.00000         3.95000        -0.78354
   0.00000      0.90000         4.00000         3.97500        -0.74595
   0.00000      0.90000         4.00000         4.00000        -0.70894
   0.00000      0.90000         4.00000         4.02500        -0.67250
   0.00000      0.90000         4.00000         4.05000        -0.63663
   0.00000      0.90000         4.00000         4.07500        -0.60130
   0.00000      0.90000         4.00000         4.10000        -0.56651
   0.00000      0.90000         4.00000         4.12500        -0.53225
   0.00000      0.90000         4.00000         4.15000        -0.49850
   0.00000      0.90000         4.00000         4.17500        -0.46525
   0.00000      0.90000         4.00000         4.20000        -0.43249
   0.00000      0.90000         4.00000         4.22500        -0.40022
   0.00000      0.90000         4.00000         4.25000        -0.36841
   0.00000      0.90000         4.00000         4.27500        -0.33707
   0.00000      0.90000         4.00000         4.30000        -0.30617
   0.00000      0.90000         4.00000         4.32500        -0.27572
   0.00000      0.90000         4.00000         4.35000        -0.24570
   0.00000      0.90000         4.00000         4.37500        -0.21611
   0.00000      0.90000         4.00000         4.40000        -0.18693
   0.00000      0.90000         4.00000         4.42500        -0.15816
   0.00000      0.90000         4.00000         4.45000        -0.12978
   0.00000      0.90000         4.00000         4.47500        -0.10180
   0.00000      0.90000         4.00000         4.50000        -0.07420
   0.00000      0.90000         4.00000         4.52500        -0.04698
   0.00000      0.90000         4.00000         4.55000        -0.02012
   0.00000      0.90000         4.00000         4.57500         0.00637
   0.00000      0.90000         4.00000         4.60000         0.03251
   0.00000      0.90000         4.00000         4.62500         0.05830
   0.00000      0.90000         4.00000         4.65000         0.08376
   0.00000      0.90000         4.00000         4.67500         0.10887
   0.00000      0.90000         4.00000         4.70000         0.13366
   0.00000      0.90000         4.00000         4.72500         0.15813
   0.00000      0.90000         4.00000         4.75000         0.18228
   0.00000      0.90000         4.00000         4.77500         0.20612
   0.00000      0.90000         4.00000         4.80000         0.22966
   0.00000      0.90000         4.00000         4.82500         0.25290
   0.00000      0.90000         4.00000         4.85000         0.27585
   0.00000      0.90000         4.00000         4.87500         0.29850
   0.00000      0.90000         4.00000         4.90000         0.32088
   0.00000      0.90000         4.00000         4.92500         0.34298
   0.00000      0.90000         4.00000         4.95000         0.36480
   0.00000      0.90000         4.00000         4.97500         0.38636
   0.00000      0.90000         4.00000         5.00000         0.40765
   0.00000      0.90000         4.00000         5.02500         0.42868
   0.00000      0.90000         4.00000         5.05000         0.44946
   0.00000      0.90000         4.00000         5.07500         0.46999
   0.00000      0.90000         4.00000         5.10000         0.49028
   0.00000      0.90000         4.00000         5.12500         0.51032
   0.00000      0.90000         4.00000         5.15000         0.53013
   0.00000      0.90000         4.00000         5.17500         0.54970
   0.00000      0.90000         4.00000         5.20000         0.56904
   0.00000      0.90000         4.00000         5.22500         0.58816
   0.00000      0.90000         4.00000         5.25000         0.60705
   0.00000      0.90000         4.00000         5.27500         0.62573
   0.00000      0.90000         4.00000         5.30000         0.64420
   0.00000      0.90000         4.00000         5.32500         0.66245
   0.00000      0.90000         4.00000         5.35000         0.68049
   0.00000      0.90000         4.00000         5.37500         0.69833
   0.00000      0.90000         4.00000         5.40000         0.71597
   0.00000      0.90000         4.00000         5.42500         0.73341
   0.00000      0.90000         4.00000         5.45000         0.75066
   0.00000      0.90000         4.00000         5.47500         0.76772
   0.00000      0.90000         4.00000         5.50000         0.78459
   0.00000      0.90000         6.00000         0.70000      -566.36011
   0.00000      0.90000         6.00000         0.72500      -439.10386
   0.00000      0.90000         6.00000         0.75000      -348.63568
   0.00000      0.90000         6.00000         0.77500      -282.67476
   0.00000      0.90000         6.00000         0.80000      -233.47292
   0.00000      0.90000         6.00000         0.82500      -196.00750
   0.00000      0.90000         6.00000         0.85000      -166.94124
   0.00000      0.90000         6.00000         0.87500      -144.00601
   0.00000      0.90000         6.00000         0.90000      -125.62803
   0.00000      0.90000         6.00000         0.92500      -110.69429
   0.00000      0.90000         6.00000         0.95000       -98.40367
   0.00000      0.90000         6.00000         0.97500       -88.17013
   0.00000      0.90000         6.00000         1.00000       -79.55845
   0.00000      0.90000         6.00000         1.02500       -72.24090
   0.00000      0.90000         6.00000         1.05000       -65.96748
   0.00000      0.90000         6.00000         1.07500       -60.54517
   0.00000      0.90000         6.00000         1.10000       -55.82326
   0.00000      0.90000         6.00000         1.12500       -51.68284
   0.00000      0.90000         6.00000         1.15000       -48.02918
   0.00000      0.90000         6.00000         1.17500       -44.78610
   0.00000      0.90000         6.00000         1.20000       -41.89182
   0.00000      0.90000         6.00000         1.22500       -39.29584
   0.00000      0.90000         6.00000         1.25000       -36.95656
   0.00000      0.90000         6.00000         1.27500       -34.83947
   0.00000      0.90000         6.00000         1.30000       -32.91576
   0.00000      0.90000         6.00000         1.32500       -31.16121
   0.00000      0.90000         6.00000         1.35000       -29.55533
   0.00000      0.90000         6.00000         1.37500       -28.08074
   0.00000      0.90000         6.00000         1.40000       -26.72255
   0.00000      0.90000         6.00000         1.42500       -25.46798
   0.00000      0.90000         6.00000         1.45000       -24.30603
   0.00000      0.90000         6.00000         1.47500       -23.22712
   0.00000      0.90000         6.00000         1.50000       -22.22294
   0.00000      0.90000         6.00000         1.52500       -21.28622
   0.00000      0.90000         6.00000         1.55000       -20.41057
   0.00000      0.90000         6.00000         1.57500       -19.59039
   0.00000      0.90000         6.00000         1.60000       -18.82070
   0.00000      0.90000         6.00000         1.62500       -18.09711
   0.00000      0.90000         6.00000         1.65000       -17.41570
   0.00000      0.90000         6.00000         1.67500       -16.77298
   0.00000      0.90000         6.00000         1.70000       -16.16582
   0.00000      0.90000         6.00000         1.72500       -15.59142
   0.00000      0.90000         6.00000         1.75000       -15.04727
   0.00000      0.90000         6.00000         1.77500       -14.53108
   0.00000      0.90000         6.00000         1.80000       -14.04081
   0.00000      0.90000         6.00000         1.82500       -13.57460
   0.00000      0.90000         6.00000         1.85000       -13.13075
   0.00000      0.90000         6.00000         1.87500       -12.70772
   0.00000      0.90000         6.00000         1.90000       -12.30413
   0.00000      0.90000         6.00000         1.92500       -11.91867
   0.00000      0.90000         6.00000         1.95000       -11.55020
   0.00000      0.90000         6.00000         1.97500       -11.19762
   0.00000      0.90000         6.00000         2.00000       -10.85996
   0.00000      0.90000         6.00000         2.02500       -10.53630
   0.00000      0.90000         6.00000         2.05000       -10.22581
   0.00000      0.90000         6.00000         2.07500        -9.92772
   0.00000      0.90000         6.00000         2.10000        -9.64132
   0.00000      0.90000         6.00000         2.12500        -9.36594
   0.00000      0.90000         6.00000         2.15000        -9.10097
   0.00000      0.90000         6.00000         2.17500        -8.84585
   0.00000      0.90000         6.00000         2.20000        -8.60005
   0.00000      0.90000         6.00000         2.22500        -8.36307
   0.00000      0.90000         6.00000         2.25000        -8.13446
   0.00000      0.90000         6.00000         2.27500        -7.91379
   0.00000      0.90000         6.00000         2.30000        -7.70066
   0.00000      0.90000         6.00000         2.32500        -7.49471
   0.00000      0.90000         6.00000         2.35000        -7.29557
   0.00000      0.90000         6.00000         2.37500        -7.10293
   0.00000      0.90000         6.00000         2.40000        -6.91648
   0.00000      0.90000         6.00000         2.42500        -6.73593
   0.00000      0.90000         6.00000         2.45000        -6.56102
   0.00000      0.90000         6.00000         2.47500        -6.39148
   0.00000      0.90000         6.00000         2.50000        -6.22707
   0.00000      0.90000         6.00000         2.52500        -6.06758
   0.00000      0.90000         6.00000         2.55000        -5.91279
   0.00000      0.90000         6.00000         2.57500        -5.76250
   0.00000      0.90000         6.00000         2.60000        -5.61653
   0.00000      0.90000         6.00000         2.62500        -5.47468
   0.00000      0.90000         6.00000         2.65000        -5.33679
   0.00000      0.90000         6.00000         2.67500        -5.20271
   0.00000      0.90000         6.00000         2.70000        -5.07228
   0.00000      0.90000         6.00000         2.72500        -4.94535
   0.00000      0.90000         6.00000         2.75000        -4.82179
   0.00000      0.90000         6.00000         2.77500        -4.70148
   0.00000      0.90000         6.00000         2.80000        -4.58428
   0.00000      0.90000         6.00000         2.82500        -4.47008
   0.00000      0.90000         6.00000         2.85000        -4.35877
   0.00000      0.90000         6.00000         2.87500        -4.25025
   0.00000      0.90000         6.00000         2.90000        -4.14441
   0.00000      0.90000         6.00000         2.92500        -4.04115
   0.00000      0.90000         6.00000         2.95000        -3.94039
   0.00000      0.90000         6.00000         2.97500        -3.84204
   0.00000      0.90000         6.00000         3.00000        -3.74601
   0.00000      0.90000         6.00000         3.02500        -3.65223
   0.00000      0.90000         6.00000         3.05000        -3.56061
   0.00000      0.90000         6.00000         3.07500        -3.47110
   0.00000      0.90000         6.00000         3.10000        -3.38361
   0.00000      0.90000         6.00000         3.12500        -3.29808
   0.00000      0.90000         6.00000         3.15000        -3.21444
   0.00000      0.90000         6.00000         3.17500        -3.13265
   0.00000      0.90000         6.00000         3.20000        -3.05263
   0.00000      0.90000         6.00000         3.22500        -2.97433
   0.00000      0.90000         6.00000         3.25000        -2.89771
   0.00000      0.90000         6.00000         3.27500        -2.82270
   0.00000      0.90000         6.00000         3.30000        -2.74925
   0.00000      0.90000         6.00000         3.32500        -2.67733
   0.00000      0.90000         6.00000         3.35000        -2.60688
   0.00000      0.90000         6.00000         3.37500        -2.53786
   0.00000      0.90000         6.00000         3.40000        -2.47024
   0.00000      0.90000         6.00000         3.42500        -2.40396
   0.00000      0.90000         6.00000         3.45000        -2.33899
   0.00000      0.90000         6.00000         3.47500        -2.27529
   0.00000      0.90000         6.00000         3.50000        -2.21283
   0.00000      0.90000         6.00000         3.52500        -2.15157
   0.00000      0.90000         6.00000         3.55000        -2.09148
   0.00000      0.90000         6.00000         3.57500        -2.03252
   0.00000      0.90000         6.00000         3.60000        -1.97467
   0.00000      0.90000         6.00000         3.62500        -1.91790
   0.00000      0.90000         6.00000         3.65000        -1.86217
   0.00000      0.90000         6.00000         3.67500        -1.80746
   0.00000      0.90000         6.00000         3.70000        -1.75374
   0.00000      0.90000         6.00000         3.72500        -1.70099
   0.00000      0.90000         6.00000         3.75000        -1.64918
   0.00000      0.90000         6.00000         3.77500        -1.59828
   0.00000      0.90000         6.00000         3.80000        -1.54828
   0.00000      0.90000         6.00000         3.82500        -1.49915
   0.00000      0.90000         6.00000         3.85000        -1.45086
   0.00000      0.90000         6.00000         3.87500        -1.40341
   0.00000      0.90000         6.00000         3.90000        -1.35676
   0.00000      0.90000         6.00000         3.92500        -1.31090
   0.00000      0.90000         6.00000         3.95000        -1.26580
   0.00000      0.90000         6.00000         3.97500        -1.22146
   0.00000      0.90000         6.00000         4.00000        -1.17785
   0.00000      0.90000         6.00000         4.02500        -1.13495
   0.00000      0.90000         6.00000         4.05000        -1.09275
   0.00000      0.90000         6.00000         4.07500        -1.05123
   0.00000      0.90000         6.00000         4.10000        -1.01037
   0.00000      0.90000         6.00000         4.12500        -0.97017
   0.00000      0.90000         6.00000         4.15000        -0.93060
   0.00000      0.90000         6.00000         4.17500        -0.89165
   0.00000      0.90000         6.00000         4.20000        -0.85331
   0.00000      0.90000         6.00000         4.22500        -0.81556
   0.00000      0.90000         6.00000         4.25000        -0.77839
   0.00000      0.90000         6.00000         4.27500        -0.74178
   0.00000      0.90000         6.00000         4.30000        -0.70574
   0.00000      0.90000         6.00000         4.32500        -0.67023
   0.00000      0.90000         6.00000         4.35000        -0.63526
   0.00000      0.90000         6.00000         4.37500        -0.60080
   0.00000      0.90000         6.00000         4.40000        -0.56685
   0.00000      0.90000         6.00000         4.42500        -0.53340
   0.00000      0.90000         6.00000         4.45000        -0.50044
   0.00000      0.90000         6.00000         4.47500        -0.46795
   0.00000      0.90000         6.00000         4.50000        -0.43594
   0.00000      0.90000         6.00000         4.52500        -0.40437
   0.00000      0.90000         6.00000         4.55000        -0.37326
   0.00000      0.90000         6.00000         4.57500        -0.34259
   0.00000      0.90000         6.00000         4.60000        -0.31234
   0.00000      0.90000         6.00000         4.62500        -0.28252
   0.00000      0.90000         6.00000         4.65000        -0.25311
   0.00000      0.90000         6.00000         4.67500        -0.22410
   0.00000      0.90000         6.00000         4.70000        -0.19549
   0.00000      0.90000         6.00000         4.72500        -0.16727
   0.00000      0.90000         6.00000         4.75000        -0.13943
   0.00000      0.90000         6.00000         4.77500        -0.11197
   0.00000      0.90000         6.00000         4.80000        -0.08487
   0.00000      0.90000         6.00000         4.82500        -0.05813
   0.00000      0.90000         6.00000         4.85000        -0.03175
   0.00000      0.90000         6.00000         4.87500        -0.00571
   0.00000      0.90000         6.00000         4.90000         0.01999
   0.00000      0.90000         6.00000         4.92500         0.04536
   0.00000      0.90000         6.00000         4.95000         0.07039
   0.00000      0.90000         6.00000         4.97500         0.09511
   0.00000      0.90000         6.00000         5.00000         0.11951
   0.00000      0.90000         6.00000         5.02500         0.14361
   0.00000      0.90000         6.00000         5.05000         0.16739
   0.00000      0.90000         6.00000         5.07500         0.19088
   0.00000      0.90000         6.00000         5.10000         0.21408
   0.00000      0.90000         6.00000         5.12500         0.23699
   0.00000      0.90000         6.00000         5.15000         0.25961
   0.00000      0.90000         6.00000         5.17500         0.28196
   0.00000      0.90000         6.00000         5.20000         0.30404
   0.00000      0.90000         6.00000         5.22500         0.32584
   0.00000      0.90000         6.00000         5.25000         0.34739
   0.00000      0.90000         6.00000         5.27500         0.36867
   0.00000      0.90000         6.00000         5.30000         0.38970
   0.00000      0.90000         6.00000         5.32500         0.41048
   0.00000      0.90000         6.00000         5.35000         0.43101
   0.00000      0.90000         6.00000         5.37500         0.45130
   0.00000      0.90000         6.00000         5.40000         0.47136
   0.00000      0.90000         6.00000         5.42500         0.49118
   0.00000      0.90000         6.00000         5.45000         0.51077
   0.00000      0.90000         6.00000         5.47500         0.53013
   0.00000      0.90000         6.00000         5.50000         0.54927
   0.00000      0.90000         8.00000         0.70000     -3025.17599
   0.00000      0.90000         8.00000         0.72500     -2108.26468
   0.00000      0.90000         8.00000         0.75000     -1515.47507
   0.00000      0.90000         8.00000         0.77500     -1120.24863
   0.00000      0.90000         8.00000         0.80000      -849.27510
   0.00000      0.90000         8.00000         0.82500      -658.70585
   0.00000      0.90000         8.00000         0.85000      -521.53655
   0.00000      0.90000         8.00000         0.87500      -420.68624
   0.00000      0.90000         8.00000         0.90000      -345.08279
   0.00000      0.90000         8.00000         0.92500      -287.38547
   0.00000      0.90000         8.00000         0.95000      -242.62527
   0.00000      0.90000         8.00000         0.97500      -207.37335
   0.00000      0.90000         8.00000         1.00000      -179.22119
   0.00000      0.90000         8.00000         1.02500      -156.44876
   0.00000      0.90000         8.00000         1.05000      -137.80871
   0.00000      0.90000         8.00000         1.07500      -122.38342
   0.00000      0.90000         8.00000         1.10000      -109.48873
   0.00000      0.90000         8.00000         1.12500       -98.60818
   0.00000      0.90000         8.00000         1.15000       -89.34724
   0.00000      0.90000         8.00000         1.17500       -81.40127
   0.00000      0.90000         8.00000         1.20000       -74.53256
   0.00000      0.90000         8.00000         1.22500       -68.55385
   0.00000      0.90000         8.00000         1.25000       -63.31625
   0.00000      0.90000         8.00000         1.27500       -58.70036
   0.00000      0.90000         8.00000         1.30000       -54.60967
   0.00000      0.90000         8.00000         1.32500       -50.96557
   0.00000      0.90000         8.00000         1.35000       -47.70353
   0.00000      0.90000         8.00000         1.37500       -44.77028
   0.00000      0.90000         8.00000         1.40000       -42.12150
   0.00000      0.90000         8.00000         1.42500       -39.72013
   0.00000      0.90000         8.00000         1.45000       -37.53497
   0.00000      0.90000         8.00000         1.47500       -35.53964
   0.00000      0.90000         8.00000         1.50000       -33.71170
   0.00000      0.90000         8.00000         1.52500       -32.03195
   0.00000      0.90000         8.00000         1.55000       -30.48394
   0.00000      0.90000         8.00000         1.57500       -29.05344
   0.00000      0.90000         8.00000         1.60000       -27.72815
   0.00000      0.90000         8.00000         1.62500       -26.49736
   0.00000      0.90000         8.00000         1.65000       -25.35172
   0.00000      0.90000         8.00000         1.67500       -24.28304
   0.00000      0.90000         8.00000         1.70000       -23.28410
   0.00000      0.90000         8.00000         1.72500       -22.34854
   0.00000      0.90000         8.00000         1.75000       -21.47073
   0.00000      0.90000         8.00000         1.77500       -20.64567
   0.00000      0.90000         8.00000         1.80000       -19.86890
   0.00000      0.90000         8.00000         1.82500       -19.13644
   0.00000      0.90000         8.00000         1.85000       -18.44473
   0.00000      0.90000         8.00000         1.87500       -17.79056
   0.00000      0.90000         8.00000         1.90000       -17.17105
   0.00000      0.90000         8.00000         1.92500       -16.58360
   0.00000      0.90000         8.00000         1.95000       -16.02585
   0.00000      0.90000         8.00000         1.97500       -15.49568
   0.00000      0.90000         8.00000         2.00000       -14.99115
   0.00000      0.90000         8.00000         2.02500       -14.51049
   0.00000      0.90000         8.00000         2.05000       -14.05210
   0.00000      0.90000         8.00000         2.07500       -13.61450
   0.00000      0.90000         8.00000         2.10000       -13.19635
   0.00000      0.90000         8.00000         2.12500       -12.79641
   0.00000      0.90000         8.00000         2.15000       -12.41356
   0.00000      0.90000         8.00000         2.17500       -12.04675
   0.00000      0.90000         8.00000         2.20000       -11.69501
   0.00000      0.90000         8.00000         2.22500       -11.35747
   0.00000      0.90000         8.00000         2.25000       -11.03330
   0.00000      0.90000         8.00000         2.27500       -10.72174
   0.00000      0.90000         8.00000         2.30000       -10.42210
   0.00000      0.90000         8.00000         2.32500       -10.13371
   0.00000      0.90000         8.00000         2.35000        -9.85597
   0.00000      0.90000         8.00000         2.37500        -9.58832
   0.00000      0.90000         8.00000         2.40000        -9.33022
   0.00000      0.90000         8.00000         2.42500        -9.08120
   0.00000      0.90000         8.00000         2.45000        -8.84080
   0.00000      0.90000         8.00000         2.47500        -8.60857
   0.00000      0.90000         8.00000         2.50000        -8.38413
   0.00000      0.90000         8.00000         2.52500        -8.16711
   0.00000      0.90000         8.00000         2.55000        -7.95714
   0.00000      0.90000         8.00000         2.57500        -7.75389
   0.00000      0.90000         8.00000         2.60000        -7.55707
   0.00000      0.90000         8.00000         2.62500        -7.36637
   0.00000      0.90000         8.00000         2.65000        -7.18153
   0.00000      0.90000         8.00000         2.67500        -7.00228
   0.00000      0.90000         8.00000         2.70000        -6.82837
   0.00000      0.90000         8.00000         2.72500        -6.65959
   0.00000      0.90000         8.00000         2.75000        -6.49572
   0.00000      0.90000         8.00000         2.77500        -6.33654
   0.00000      0.90000         8.00000         2.80000        -6.18187
   0.00000      0.90000         8.00000         2.82500        -6.03152
   0.00000      0.90000         8.00000         2.85000        -5.88531
   0.00000      0.90000         8.00000         2.87500        -5.74309
   0.00000      0.90000         8.00000         2.90000        -5.60470
   0.00000      0.90000         8.00000         2.92500        -5.46998
   0.00000      0.90000         8.00000         2.95000        -5.33880
   0.00000      0.90000         8.00000         2.97500        -5.21103
   0.00000      0.90000         8.00000         3.00000        -5.08653
   0.00000      0.90000         8.00000         3.02500        -4.96519
   0.00000      0.90000         8.00000         3.05000        -4.84689
   0.00000      0.90000         8.00000         3.07500        -4.73152
   0.00000      0.90000         8.00000         3.10000        -4.61898
   0.00000      0.90000         8.00000         3.12500        -4.50916
   0.00000      0.90000         8.00000         3.15000        -4.40197
   0.00000      0.90000         8.00000         3.17500        -4.29733
   0.00000      0.90000         8.00000         3.20000        -4.19514
   0.00000      0.90000         8.00000         3.22500        -4.09532
   0.00000      0.90000         8.00000         3.25000        -3.99779
   0.00000      0.90000         8.00000         3.27500        -3.90248
   0.00000      0.90000         8.00000         3.30000        -3.80931
   0.00000      0.90000         8.00000         3.32500        -3.71822
   0.00000      0.90000         8.00000         3.35000        -3.62914
   0.00000      0.90000         8.00000         3.37500        -3.54200
   0.00000      0.90000         8.00000         3.40000        -3.45674
   0.00000      0.90000         8.00000         3.42500        -3.37331
   0.00000      0.90000         8.00000         3.45000        -3.29165
   0.00000      0.90000         8.00000         3.47500        -3.21170
   0.00000      0.90000         8.00000         3.50000        -3.13341
   0.00000      0.90000         8.00000         3.52500        -3.05674
   0.00000      0.90000         8.00000         3.55000        -2.98163
   0.00000      0.90000         8.00000         3.57500        -2.90804
   0.00000      0.90000         8.00000         3.60000        -2.83593
   0.00000      0.90000         8.00000         3.62500        -2.76525
   0.00000      0.90000         8.00000         3.65000        -2.69596
   0.00000      0.90000         8.00000         3.67500        -2.62802
   0.00000      0.90000         8.00000         3.70000        -2.56140
   0.00000      0.90000         8.00000         3.72500        -2.49605
   0.00000      0.90000         8.00000         3.75000        -2.43195
   0.00000      0.90000         8.00000         3.77500        -2.36906
   0.00000      0.90000         8.00000         3.80000        -2.30734
   0.00000      0.90000         8.00000         3.82500        -2.24676
   0.00000      0.90000         8.00000         3.85000        -2.18730
   0.00000      0.90000         8.00000         3.87500        -2.12893
   0.00000      0.90000         8.00000         3.90000        -2.07161
   0.00000      0.90000         8.00000         3.92500        -2.01532
   0.00000      0.90000         8.00000         3.95000        -1.96003
   0.00000      0.90000         8.00000         3.97500        -1.90572
   0.00000      0.90000         8.00000         4.00000        -1.85236
   0.00000      0.90000         8.00000         4.02500        -1.79992
   0.00000      0.90000         8.00000         4.05000        -1.74840
   0.00000      0.90000         8.00000         4.07500        -1.69775
   0.00000      0.90000         8.00000         4.10000        -1.64797
   0.00000      0.90000         8.00000         4.12500        -1.59902
   0.00000      0.90000         8.00000         4.15000        -1.55089
   0.00000      0.90000         8.00000         4.17500        -1.50357
   0.00000      0.90000         8.00000         4.20000        -1.45702
   0.00000      0.90000         8.00000         4.22500        -1.41124
   0.00000      0.90000         8.00000         4.25000        -1.36620
   0.00000      0.90000         8.00000         4.27500        -1.32188
   0.00000      0.90000         8.00000         4.30000        -1.27828
   0.00000      0.90000         8.00000         4.32500        -1.23537
   0.00000      0.90000         8.00000         4.35000        -1.19314
   0.00000      0.90000         8.00000         4.37500        -1.15157
   0.00000      0.90000         8.00000         4.40000        -1.11065
   0.00000      0.90000         8.00000         4.42500        -1.07036
   0.00000      0.90000         8.00000         4.45000        -1.03069
   0.00000      0.90000         8.00000         4.47500        -0.99163
   0.00000      0.90000         8.00000         4.50000        -0.95316
   0.00000      0.90000         8.00000         4.52500        -0.91527
   0.00000      0.90000         8.00000         4.55000        -0.87795
   0.00000      0.90000         8.00000         4.57500        -0.84118
   0.00000      0.90000         8.00000         4.60000        -0.80495
   0.00000      0.90000         8.00000         4.62500        -0.76926
   0.00000      0.90000         8.00000         4.65000        -0.73408
   0.00000      0.90000         8.00000         4.67500        -0.69942
   0.00000      0.90000         8.00000         4.70000        -0.66526
   0.00000      0.90000         8.00000         4.72500        -0.63158
   0.00000      0.90000         8.00000         4.75000        -0.59838
   0.00000      0.90000         8.00000         4.77500        -0.56565
   0.00000      0.90000         8.00000         4.80000        -0.53339
   0.00000      0.90000         8.00000         4.82500        -0.50157
   0.00000      0.90000         8.00000         4.85000        -0.47019
   0.00000      0.90000         8.00000         4.87500        -0.43925
   0.00000      0.90000         8.00000         4.90000        -0.40873
   0.00000      0.90000         8.00000         4.92500        -0.37862
   0.00000      0.90000         8.00000         4.95000        -0.34893
   0.00000      0.90000         8.00000         4.97500        -0.31963
   0.00000      0.90000         8.00000         5.00000        -0.29073
   0.00000      0.90000         8.00000         5.02500        -0.26221
   0.00000      0.90000         8.00000         5.05000        -0.23407
   0.00000      0.90000         8.00000         5.07500        -0.20629
   0.00000      0.90000         8.00000         5.10000        -0.17889
   0.00000      0.90000         8.00000         5.12500        -0.15183
   0.00000      0.90000         8.00000         5.15000        -0.12513
   0.00000      0.90000         8.00000         5.17500        -0.09878
   0.00000      0.90000         8.00000         5.20000        -0.07275
   0.00000      0.90000         8.00000         5.22500        -0.04706
   0.00000      0.90000         8.00000         5.25000        -0.02170
   0.00000      0.90000         8.00000         5.27500         0.00334
   0.00000      0.90000         8.00000         5.30000         0.02808
   0.00000      0.90000         8.00000         5.32500         0.05250
   0.00000      0.90000         8.00000         5.35000         0.07662
   0.00000      0.90000         8.00000         5.37500         0.10045
   0.00000      0.90000         8.00000         5.40000         0.12398
   0.00000      0.90000         8.00000         5.42500         0.14722
   0.00000      0.90000         8.00000         5.45000         0.17019
   0.00000      0.90000         8.00000         5.47500         0.19287
   0.00000      0.90000         8.00000         5.50000         0.21529
   0.00000      0.90000        10.00000         0.70000    -22501.86253
   0.00000      0.90000        10.00000         0.72500    -14125.30203
   0.00000      0.90000        10.00000         0.75000     -9194.36680
   0.00000      0.90000        10.00000         0.77500     -6184.96347
   0.00000      0.90000        10.00000         0.80000     -4287.12820
   0.00000      0.90000        10.00000         0.82500     -3054.06679
   0.00000      0.90000        10.00000         0.85000     -2230.81369
   0.00000      0.90000        10.00000         0.87500     -1667.29410
   0.00000      0.90000        10.00000         0.90000     -1272.63058
   0.00000      0.90000        10.00000         0.92500      -990.33927
   0.00000      0.90000        10.00000         0.95000      -784.46013
   0.00000      0.90000        10.00000         0.97500      -631.58612
   0.00000      0.90000        10.00000         1.00000      -516.16518
   0.00000      0.90000        10.00000         1.02500      -427.66550
   0.00000      0.90000        10.00000         1.05000      -358.82757
   0.00000      0.90000        10.00000         1.07500      -304.56416
   0.00000      0.90000        10.00000         1.10000      -261.25497
   0.00000      0.90000        10.00000         1.12500      -226.28629
   0.00000      0.90000        10.00000         1.15000      -197.74545
   0.00000      0.90000        10.00000         1.17500      -174.21502
   0.00000      0.90000        10.00000         1.20000      -154.63195
   0.00000      0.90000        10.00000         1.22500      -138.19007
   0.00000      0.90000        10.00000         1.25000      -124.27148
   0.00000      0.90000        10.00000         1.27500      -112.39791
   0.00000      0.90000        10.00000         1.30000      -102.19562
   0.00000      0.90000        10.00000         1.32500       -93.36999
   0.00000      0.90000        10.00000         1.35000       -85.68682
   0.00000      0.90000        10.00000         1.37500       -78.95841
   0.00000      0.90000        10.00000         1.40000       -73.03323
   0.00000      0.90000        10.00000         1.42500       -67.78805
   0.00000      0.90000        10.00000         1.45000       -63.12200
   0.00000      0.90000        10.00000         1.47500       -58.95193
   0.00000      0.90000        10.00000         1.50000       -55.20893
   0.00000      0.90000        10.00000         1.52500       -51.83551
   0.00000      0.90000        10.00000         1.55000       -48.78346
   0.00000      0.90000        10.00000         1.57500       -46.01216
   0.00000      0.90000        10.00000         1.60000       -43.48717
   0.00000      0.90000        10.00000         1.62500       -41.17916
   0.00000      0.90000        10.00000         1.65000       -39.06306
   0.00000      0.90000        10.00000         1.67500       -37.11732
   0.00000      0.90000        10.00000         1.70000       -35.32336
   0.00000      0.90000        10.00000         1.72500       -33.66507
   0.00000      0.90000        10.00000         1.75000       -32.12845
   0.00000      0.90000        10.00000         1.77500       -30.70128
   0.00000      0.90000        10.00000         1.80000       -29.37284
   0.00000      0.90000        10.00000         1.82500       -28.13374
   0.00000      0.90000        10.00000         1.85000       -26.97568
   0.00000      0.90000        10.00000         1.87500       -25.89133
   0.00000      0.90000        10.00000         1.90000       -24.87416
   0.00000      0.90000        10.00000         1.92500       -23.91840
   0.00000      0.90000        10.00000         1.95000       -23.01888
   0.00000      0.90000        10.00000         1.97500       -22.17098
   0.00000      0.90000        10.00000         2.00000       -21.37055
   0.00000      0.90000        10.00000         2.02500       -20.61387
   0.00000      0.90000        10.00000         2.05000       -19.89759
   0.00000      0.90000        10.00000         2.07500       -19.21867
   0.00000      0.90000        10.00000         2.10000       -18.57436
   0.00000      0.90000        10.00000         2.12500       -17.96219
   0.00000      0.90000        10.00000         2.15000       -17.37989
   0.00000      0.90000        10.00000         2.17500       -16.82540
   0.00000      0.90000        10.00000         2.20000       -16.29684
   0.00000      0.90000        10.00000         2.22500       -15.79250
   0.00000      0.90000        10.00000         2.25000       -15.31080
   0.00000      0.90000        10.00000         2.27500       -14.85030
   0.00000      0.90000        10.00000         2.30000       -14.40968
   0.00000      0.90000        10.00000         2.32500       -13.98771
   0.00000      0.90000        10.00000         2.35000       -13.58328
   0.00000      0.90000        10.00000         2.37500       -13.19535
   0.00000      0.90000        10.00000         2.40000       -12.82296
   0.00000      0.90000        10.00000         2.42500       -12.46522
   0.00000      0.90000        10.00000         2.45000       -12.12131
   0.00000      0.90000        10.00000         2.47500       -11.79047
   0.00000      0.90000        10.00000         2.50000       -11.47199
   0.00000      0.90000        10.00000         2.52500       -11.16521
   0.00000      0.90000        10.00000         2.55000       -10.86952
   0.00000      0.90000        10.00000         2.57500       -10.58434
   0.00000      0.90000        10.00000         2.60000       -10.30915
   0.00000      0.90000        10.00000         2.62500       -10.04344
   0.00000      0.90000        10.00000         2.65000        -9.78674
   0.00000      0.90000        10.00000         2.67500        -9.53862
   0.00000      0.90000        10.00000         2.70000        -9.29867
   0.00000      0.90000        10.00000         2.72500        -9.06650
   0.00000      0.90000        10.00000         2.75000        -8.84175
   0.00000      0.90000        10.00000         2.77500        -8.62408
   0.00000      0.90000        10.00000         2.80000        -8.41318
   0.00000      0.90000        10.00000         2.82500        -8.20874
   0.00000      0.90000        10.00000         2.85000        -8.01047
   0.00000      0.90000        10.00000         2.87500        -7.81812
   0.00000      0.90000        10.00000         2.90000        -7.63143
   0.00000      0.90000        10.00000         2.92500        -7.45015
   0.00000      0.90000        10.00000         2.95000        -7.27407
   0.00000      0.90000        10.00000         2.97500        -7.10297
   0.00000      0.90000        10.00000         3.00000        -6.93666
   0.00000      0.90000        10.00000         3.02500        -6.77493
   0.00000      0.90000        10.00000         3.05000        -6.61760
   0.00000      0.90000        10.00000         3.07500        -6.46451
   0.00000      0.90000        10.00000         3.10000        -6.31550
   0.00000      0.90000        10.00000         3.12500        -6.17040
   0.00000      0.90000        10.00000         3.15000        -6.02906
   0.00000      0.90000        10.00000         3.17500        -5.89136
   0.00000      0.90000        10.00000         3.20000        -5.75715
   0.00000      0.90000        10.00000         3.22500        -5.62631
   0.00000      0.90000        10.00000         3.25000        -5.49872
   0.00000      0.90000        10.00000         3.27500        -5.37426
   0.00000      0.90000        10.00000         3.30000        -5.25281
   0.00000      0.90000        10.00000         3.32500        -5.13429
   0.00000      0.90000        10.00000         3.35000        -5.01858
   0.00000      0.90000        10.00000         3.37500        -4.90559
   0.00000      0.90000        10.00000         3.40000        -4.79523
   0.00000      0.90000        10.00000         3.42500        -4.68741
   0.00000      0.90000        10.00000         3.45000        -4.58204
   0.00000      0.90000        10.00000         3.47500        -4.47906
   0.00000      0.90000        10.00000         3.50000        -4.37837
   0.00000      0.90000        10.00000         3.52500        -4.27991
   0.00000      0.90000        10.00000         3.55000        -4.18360
   0.00000      0.90000        10.00000         3.57500        -4.08939
   0.00000      0.90000        10.00000         3.60000        -3.99719
   0.00000      0.90000        10.00000         3.62500        -3.90696
   0.00000      0.90000        10.00000         3.65000        -3.81863
   0.00000      0.90000        10.00000         3.67500        -3.73214
   0.00000      0.90000        10.00000         3.70000        -3.64744
   0.00000      0.90000        10.00000         3.72500        -3.56448
   0.00000      0.90000        10.00000         3.75000        -3.48320
   0.00000      0.90000        10.00000         3.77500        -3.40356
   0.00000      0.90000        10.00000         3.80000        -3.32551
   0.00000      0.90000        10.00000         3.82500        -3.24900
   0.00000      0.90000        10.00000         3.85000        -3.17399
   0.00000      0.90000        10.00000         3.87500        -3.10044
   0.00000      0.90000        10.00000         3.90000        -3.02831
   0.00000      0.90000        10.00000         3.92500        -2.95755
   0.00000      0.90000        10.00000         3.95000        -2.88814
   0.00000      0.90000        10.00000         3.97500        -2.82002
   0.00000      0.90000        10.00000         4.00000        -2.75318
   0.00000      0.90000        10.00000         4.02500        -2.68758
   0.00000      0.90000        10.00000         4.05000        -2.62317
   0.00000      0.90000        10.00000         4.07500        -2.55994
   0.00000      0.90000        10.00000         4.10000        -2.49785
   0.00000      0.90000        10.00000         4.12500        -2.43687
   0.00000      0.90000        10.00000         4.15000        -2.37697
   0.00000      0.90000        10.00000         4.17500        -2.31812
   0.00000      0.90000        10.00000         4.20000        -2.26031
   0.00000      0.90000        10.00000         4.22500        -2.20350
   0.00000      0.90000        10.00000         4.25000        -2.14767
   0.00000      0.90000        10.00000         4.27500        -2.09279
   0.00000      0.90000        10.00000         4.30000        -2.03884
   0.00000      0.90000        10.00000         4.32500        -1.98580
   0.00000      0.90000        10.00000         4.35000        -1.93365
   0.00000      0.90000        10.00000         4.37500        -1.88237
   0.00000      0.90000        10.00000         4.40000        -1.83192
   0.00000      0.90000        10.00000         4.42500        -1.78231
   0.00000      0.90000        10.00000         4.45000        -1.73349
   0.00000      0.90000        10.00000         4.47500        -1.68547
   0.00000      0.90000        10.00000         4.50000        -1.63822
   0.00000      0.90000        10.00000         4.52500        -1.59171
   0.00000      0.90000        10.00000         4.55000        -1.54594
   0.00000      0.90000        10.00000         4.57500        -1.50089
   0.00000      0.90000        10.00000         4.60000        -1.45654
   0.00000      0.90000        10.00000         4.62500        -1.41288
   0.00000      0.90000        10.00000         4.65000        -1.36989
   0.00000      0.90000        10.00000         4.67500        -1.32755
   0.00000      0.90000        10.00000         4.70000        -1.28586
   0.00000      0.90000        10.00000         4.72500        -1.24479
   0.00000      0.90000        10.00000         4.75000        -1.20434
   0.00000      0.90000        10.00000         4.77500        -1.16449
   0.00000      0.90000        10.00000         4.80000        -1.12523
   0.00000      0.90000        10.00000         4.82500        -1.08655
   0.00000      0.90000        10.00000         4.85000        -1.04843
   0.00000      0.90000        10.00000         4.87500        -1.01086
   0.00000      0.90000        10.00000         4.90000        -0.97384
   0.00000      0.90000        10.00000         4.92500        -0.93734
   0.00000      0.90000        10.00000         4.95000        -0.90137
   0.00000      0.90000        10.00000         4.97500        -0.86590
   0.00000      0.90000        10.00000         5.00000        -0.83093
   0.00000      0.90000        10.00000         5.02500        -0.79645
   0.00000      0.90000        10.00000         5.05000        -0.76245
   0.00000      0.90000        10.00000         5.07500        -0.72892
   0.00000      0.90000        10.00000         5.10000        -0.69585
   0.00000      0.90000        10.00000         5.12500        -0.66323
   0.00000      0.90000        10.00000         5.15000        -0.63105
   0.00000      0.90000        10.00000         5.17500        -0.59931
   0.00000      0.90000        10.00000         5.20000        -0.56799
   0.00000      0.90000        10.00000         5.22500        -0.53709
   0.00000      0.90000        10.00000         5.25000        -0.50661
   0.00000      0.90000        10.00000         5.27500        -0.47652
   0.00000      0.90000        10.00000         5.30000        -0.44682
   0.00000      0.90000        10.00000         5.32500        -0.41752
   0.00000      0.90000        10.00000         5.35000        -0.38859
   0.00000      0.90000        10.00000         5.37500        -0.36004
   0.00000      0.90000        10.00000         5.40000        -0.33185
   0.00000      0.90000        10.00000         5.42500        -0.30403
   0.00000      0.90000        10.00000         5.45000        -0.27655
   0.00000      0.90000        10.00000         5.47500        -0.24942
   0.00000      0.90000        10.00000         5.50000        -0.22264
   0.00000      0.90000        10.00000         5.60000        -0.11877
   0.00000      0.90000        10.00000         5.62500        -0.09360
   0.00000      0.90000        10.00000         5.65000        -0.06873
   0.00000      0.90000        10.00000         5.67500        -0.04417
   0.00000      0.90000        10.00000         5.70000        -0.01990
   0.00000      0.90000        10.00000         5.72500         0.00408
   0.00000      0.90000        10.00000         5.75000         0.02777
   0.00000      0.90000        10.00000         5.77500         0.05119
   0.00000      0.90000        10.00000         5.80000         0.07432
   0.00000      0.90000        10.00000         5.85000         0.11979
   0.00000      0.80000         0.00000         0.47500      -286.49514
   0.00000      0.80000         0.00000         0.50000      -226.89863
   0.00000      0.80000         0.00000         0.52500      -184.60874
   0.00000      0.80000         0.00000         0.55000      -153.59436
   0.00000      0.80000         0.00000         0.57500      -130.19864
   0.00000      0.80000         0.00000         0.60000      -112.11583
   0.00000      0.80000         0.00000         0.62500       -97.84161
   0.00000      0.80000         0.00000         0.65000       -86.36452
   0.00000      0.80000         0.00000         0.67500       -76.98616
   0.00000      0.80000         0.00000         0.70000       -69.21274
   0.00000      0.80000         0.00000         0.72500       -62.68764
   0.00000      0.80000         0.00000         0.75000       -57.14837
   0.00000      0.80000         0.00000         0.77500       -52.39837
   0.00000      0.80000         0.00000         0.80000       -48.28814
   0.00000      0.80000         0.00000         0.82500       -44.70236
   0.00000      0.80000         0.00000         0.85000       -41.55091
   0.00000      0.80000         0.00000         0.87500       -38.76251
   0.00000      0.80000         0.00000         0.90000       -36.28022
   0.00000      0.80000         0.00000         0.92500       -34.05804
   0.00000      0.80000         0.00000         0.95000       -32.05849
   0.00000      0.80000         0.00000         0.97500       -30.25076
   0.00000      0.80000         0.00000         1.00000       -28.60935
   0.00000      0.80000         0.00000         1.02500       -27.11296
   0.00000      0.80000         0.00000         1.05000       -25.74369
   0.00000      0.80000         0.00000         1.07500       -24.48642
   0.00000      0.80000         0.00000         1.10000       -23.32828
   0.00000      0.80000         0.00000         1.12500       -22.25825
   0.00000      0.80000         0.00000         1.15000       -21.26687
   0.00000      0.80000         0.00000         1.17500       -20.34594
   0.00000      0.80000         0.00000         1.20000       -19.48837
   0.00000      0.80000         0.00000         1.22500       -18.68796
   0.00000      0.80000         0.00000         1.25000       -17.93928
   0.00000      0.80000         0.00000         1.27500       -17.23755
   0.00000      0.80000         0.00000         1.30000       -16.57857
   0.00000      0.80000         0.00000         1.32500       -15.95861
   0.00000      0.80000         0.00000         1.35000       -15.37435
   0.00000      0.80000         0.00000         1.37500       -14.82284
   0.00000      0.80000         0.00000         1.40000       -14.30145
   0.00000      0.80000         0.00000         1.42500       -13.80780
   0.00000      0.80000         0.00000         1.45000       -13.33977
   0.00000      0.80000         0.00000         1.47500       -12.89543
   0.00000      0.80000         0.00000         1.50000       -12.47307
   0.00000      0.80000         0.00000         1.52500       -12.07110
   0.00000      0.80000         0.00000         1.55000       -11.68810
   0.00000      0.80000         0.00000         1.57500       -11.32278
   0.00000      0.80000         0.00000         1.60000       -10.97395
   0.00000      0.80000         0.00000         1.62500       -10.64054
   0.00000      0.80000         0.00000         1.65000       -10.32156
   0.00000      0.80000         0.00000         1.67500       -10.01609
   0.00000      0.80000         0.00000         1.70000        -9.72331
   0.00000      0.80000         0.00000         1.72500        -9.44246
   0.00000      0.80000         0.00000         1.75000        -9.17282
   0.00000      0.80000         0.00000         1.77500        -8.91375
   0.00000      0.80000         0.00000         1.80000        -8.66463
   0.00000      0.80000         0.00000         1.82500        -8.42493
   0.00000      0.80000         0.00000         1.85000        -8.19411
   0.00000      0.80000         0.00000         1.87500        -7.97170
   0.00000      0.80000         0.00000         1.90000        -7.75725
   0.00000      0.80000         0.00000         1.92500        -7.55035
   0.00000      0.80000         0.00000         1.95000        -7.35061
   0.00000      0.80000         0.00000         1.97500        -7.15766
   0.00000      0.80000         0.00000         2.00000        -6.97118
   0.00000      0.80000         0.00000         2.02500        -6.79084
   0.00000      0.80000         0.00000         2.05000        -6.61635
   0.00000      0.80000         0.00000         2.07500        -6.44743
   0.00000      0.80000         0.00000         2.10000        -6.28382
   0.00000      0.80000         0.00000         2.12500        -6.12529
   0.00000      0.80000         0.00000         2.15000        -5.97159
   0.00000      0.80000         0.00000         2.17500        -5.82252
   0.00000      0.80000         0.00000         2.20000        -5.67787
   0.00000      0.80000         0.00000         2.22500        -5.53745
   0.00000      0.80000         0.00000         2.25000        -5.40107
   0.00000      0.80000         0.00000         2.27500        -5.26858
   0.00000      0.80000         0.00000         2.30000        -5.13980
   0.00000      0.80000         0.00000         2.32500        -5.01459
   0.00000      0.80000         0.00000         2.35000        -4.89280
   0.00000      0.80000         0.00000         2.37500        -4.77429
   0.00000      0.80000         0.00000         2.40000        -4.65894
   0.00000      0.80000         0.00000         2.42500        -4.54662
   0.00000      0.80000         0.00000         2.45000        -4.43721
   0.00000      0.80000         0.00000         2.47500        -4.33061
   0.00000      0.80000         0.00000         2.50000        -4.22671
   0.00000      0.80000         0.00000         2.52500        -4.12542
   0.00000      0.80000         0.00000         2.55000        -4.02662
   0.00000      0.80000         0.00000         2.57500        -3.93024
   0.00000      0.80000         0.00000         2.60000        -3.83619
   0.00000      0.80000         0.00000         2.62500        -3.74439
   0.00000      0.80000         0.00000         2.65000        -3.65475
   0.00000      0.80000         0.00000         2.67500        -3.56721
   0.00000      0.80000         0.00000         2.70000        -3.48169
   0.00000      0.80000         0.00000         2.72500        -3.39812
   0.00000      0.80000         0.00000         2.75000        -3.31645
   0.00000      0.80000         0.00000         2.77500        -3.23660
   0.00000      0.80000         0.00000         2.80000        -3.15851
   0.00000      0.80000         0.00000         2.82500        -3.08214
   0.00000      0.80000         0.00000         2.85000        -3.00742
   0.00000      0.80000         0.00000         2.87500        -2.93430
   0.00000      0.80000         0.00000         2.90000        -2.86273
   0.00000      0.80000         0.00000         2.92500        -2.79267
   0.00000      0.80000         0.00000         2.95000        -2.72407
   0.00000      0.80000         0.00000         2.97500        -2.65689
   0.00000      0.80000         0.00000         3.00000        -2.59107
   0.00000      0.80000         0.00000         3.02500        -2.52658
   0.00000      0.80000         0.00000         3.05000        -2.46339
   0.00000      0.80000         0.00000         3.07500        -2.40145
   0.00000      0.80000         0.00000         3.10000        -2.34073
   0.00000      0.80000         0.00000         3.12500        -2.28119
   0.00000      0.80000         0.00000         3.15000        -2.22280
   0.00000      0.80000         0.00000         3.17500        -2.16553
   0.00000      0.80000         0.00000         3.20000        -2.10934
   0.00000      0.80000         0.00000         3.22500        -2.05421
   0.00000      0.80000         0.00000         3.25000        -2.00011
   0.00000      0.80000         0.00000         3.27500        -1.94700
   0.00000      0.80000         0.00000         3.30000        -1.89487
   0.00000      0.80000         0.00000         3.32500        -1.84368
   0.00000      0.80000         0.00000         3.35000        -1.79341
   0.00000      0.80000         0.00000         3.37500        -1.74405
   0.00000      0.80000         0.00000         3.40000        -1.69555
   0.00000      0.80000         0.00000         3.42500        -1.64791
   0.00000      0.80000         0.00000         3.45000        -1.60110
   0.00000      0.80000         0.00000         3.47500        -1.55509
   0.00000      0.80000         0.00000         3.50000        -1.50988
   0.00000      0.80000         0.00000         3.52500        -1.46543
   0.00000      0.80000         0.00000         3.55000        -1.42173
   0.00000      0.80000         0.00000         3.57500        -1.37877
   0.00000      0.80000         0.00000         3.60000        -1.33651
   0.00000      0.80000         0.00000         3.62500        -1.29496
   0.00000      0.80000         0.00000         3.65000        -1.25408
   0.00000      0.80000         0.00000         3.67500        -1.21387
   0.00000      0.80000         0.00000         3.70000        -1.17430
   0.00000      0.80000         0.00000         3.72500        -1.13537
   0.00000      0.80000         0.00000         3.75000        -1.09706
   0.00000      0.80000         0.00000         3.77500        -1.05935
   0.00000      0.80000         0.00000         3.80000        -1.02223
   0.00000      0.80000         0.00000         3.82500        -0.98569
   0.00000      0.80000         0.00000         3.85000        -0.94971
   0.00000      0.80000         0.00000         3.87500        -0.91428
   0.00000      0.80000         0.00000         3.90000        -0.87939
   0.00000      0.80000         0.00000         3.92500        -0.84503
   0.00000      0.80000         0.00000         3.95000        -0.81118
   0.00000      0.80000         0.00000         3.97500        -0.77784
   0.00000      0.80000         0.00000         4.00000        -0.74499
   0.00000      0.80000         0.00000         4.02500        -0.71263
   0.00000      0.80000         0.00000         4.05000        -0.68073
   0.00000      0.80000         0.00000         4.07500        -0.64930
   0.00000      0.80000         0.00000         4.10000        -0.61832
   0.00000      0.80000         0.00000         4.12500        -0.58779
   0.00000      0.80000         0.00000         4.15000        -0.55769
   0.00000      0.80000         0.00000         4.17500        -0.52802
   0.00000      0.80000         0.00000         4.20000        -0.49876
   0.00000      0.80000         0.00000         4.22500        -0.46991
   0.00000      0.80000         0.00000         4.25000        -0.44146
   0.00000      0.80000         0.00000         4.27500        -0.41340
   0.00000      0.80000         0.00000         4.30000        -0.38573
   0.00000      0.80000         0.00000         4.32500        -0.35843
   0.00000      0.80000         0.00000         4.35000        -0.33150
   0.00000      0.80000         0.00000         4.37500        -0.30494
   0.00000      0.80000         0.00000         4.40000        -0.27873
   0.00000      0.80000         0.00000         4.42500        -0.25286
   0.00000      0.80000         0.00000         4.45000        -0.22734
   0.00000      0.80000         0.00000         4.47500        -0.20216
   0.00000      0.80000         0.00000         4.50000        -0.17730
   0.00000      0.80000         0.00000         4.52500        -0.15277
   0.00000      0.80000         0.00000         4.55000        -0.12855
   0.00000      0.80000         0.00000         4.57500        -0.10464
   0.00000      0.80000         0.00000         4.60000        -0.08104
   0.00000      0.80000         0.00000         4.62500        -0.05773
   0.00000      0.80000         0.00000         4.65000        -0.03472
   0.00000      0.80000         0.00000         4.67500        -0.01200
   0.00000      0.80000         0.00000         4.70000         0.01044
   0.00000      0.80000         0.00000         4.72500         0.03260
   0.00000      0.80000         0.00000         4.75000         0.05448
   0.00000      0.80000         0.00000         4.77500         0.07610
   0.00000      0.80000         0.00000         4.80000         0.09746
   0.00000      0.80000         0.00000         4.82500         0.11855
   0.00000      0.80000         0.00000         4.85000         0.13939
   0.00000      0.80000         0.00000         4.87500         0.15998
   0.00000      0.80000         0.00000         4.90000         0.18033
   0.00000      0.80000         0.00000         4.92500         0.20043
   0.00000      0.80000         0.00000         4.95000         0.22030
   0.00000      0.80000         0.00000         4.97500         0.23993
   0.00000      0.80000         0.00000         5.00000         0.25934
   0.00000      0.80000         0.00000         5.02500         0.27851
   0.00000      0.80000         0.00000         5.05000         0.29747
   0.00000      0.80000         0.00000         5.07500         0.31621
   0.00000      0.80000         0.00000         5.10000         0.33473
   0.00000      0.80000         0.00000         5.12500         0.35304
   0.00000      0.80000         0.00000         5.15000         0.37115
   0.00000      0.80000         0.00000         5.17500         0.38905
   0.00000      0.80000         0.00000         5.20000         0.40674
   0.00000      0.80000         0.00000         5.22500         0.42425
   0.00000      0.80000         0.00000         5.25000         0.44155
   0.00000      0.80000         0.00000         5.27500         0.45867
   0.00000      0.80000         0.00000         5.30000         0.47559
   0.00000      0.80000         0.00000         5.32500         0.49233
   0.00000      0.80000         0.00000         5.35000         0.50889
   0.00000      0.80000         0.00000         5.37500         0.52527
   0.00000      0.80000         0.00000         5.40000         0.54147
   0.00000      0.80000         0.00000         5.42500         0.55750
   0.00000      0.80000         0.00000         5.45000         0.57336
   0.00000      0.80000         0.00000         5.47500         0.58904
   0.00000      0.80000         1.00000         0.47500      -340.56612
   0.00000      0.80000         1.00000         0.50000      -264.10526
   0.00000      0.80000         1.00000         0.52500      -211.16956
   0.00000      0.80000         1.00000         0.55000      -173.16265
   0.00000      0.80000         1.00000         0.57500      -145.01281
   0.00000      0.80000         1.00000         0.60000      -123.59884
   0.00000      0.80000         1.00000         0.62500      -106.92781
   0.00000      0.80000         1.00000         0.65000       -93.68532
   0.00000      0.80000         1.00000         0.67500       -82.97930
   0.00000      0.80000         1.00000         0.70000       -74.18870
   0.00000      0.80000         1.00000         0.72500       -66.87122
   0.00000      0.80000         1.00000         0.75000       -60.70537
   0.00000      0.80000         1.00000         0.77500       -55.45317
   0.00000      0.80000         1.00000         0.80000       -50.93546
   0.00000      0.80000         1.00000         0.82500       -47.01536
   0.00000      0.80000         1.00000         0.85000       -43.58680
   0.00000      0.80000         1.00000         0.87500       -40.56659
   0.00000      0.80000         1.00000         0.90000       -37.88870
   0.00000      0.80000         1.00000         0.92500       -35.50019
   0.00000      0.80000         1.00000         0.95000       -33.35816
   0.00000      0.80000         1.00000         0.97500       -31.42759
   0.00000      0.80000         1.00000         1.00000       -29.67960
   0.00000      0.80000         1.00000         1.02500       -28.09019
   0.00000      0.80000         1.00000         1.05000       -26.63934
   0.00000      0.80000         1.00000         1.07500       -25.31013
   0.00000      0.80000         1.00000         1.10000       -24.08827
   0.00000      0.80000         1.00000         1.12500       -22.96156
   0.00000      0.80000         1.00000         1.15000       -21.91954
   0.00000      0.80000         1.00000         1.17500       -20.95322
   0.00000      0.80000         1.00000         1.20000       -20.05480
   0.00000      0.80000         1.00000         1.22500       -19.21750
   0.00000      0.80000         1.00000         1.25000       -18.43541
   0.00000      0.80000         1.00000         1.27500       -17.70333
   0.00000      0.80000         1.00000         1.30000       -17.01669
   0.00000      0.80000         1.00000         1.32500       -16.37146
   0.00000      0.80000         1.00000         1.35000       -15.76407
   0.00000      0.80000         1.00000         1.37500       -15.19132
   0.00000      0.80000         1.00000         1.40000       -14.65037
   0.00000      0.80000         1.00000         1.42500       -14.13870
   0.00000      0.80000         1.00000         1.45000       -13.65400
   0.00000      0.80000         1.00000         1.47500       -13.19425
   0.00000      0.80000         1.00000         1.50000       -12.75757
   0.00000      0.80000         1.00000         1.52500       -12.34230
   0.00000      0.80000         1.00000         1.55000       -11.94692
   0.00000      0.80000         1.00000         1.57500       -11.57006
   0.00000      0.80000         1.00000         1.60000       -11.21045
   0.00000      0.80000         1.00000         1.62500       -10.86695
   0.00000      0.80000         1.00000         1.65000       -10.53852
   0.00000      0.80000         1.00000         1.67500       -10.22419
   0.00000      0.80000         1.00000         1.70000        -9.92309
   0.00000      0.80000         1.00000         1.72500        -9.63440
   0.00000      0.80000         1.00000         1.75000        -9.35739
   0.00000      0.80000         1.00000         1.77500        -9.09137
   0.00000      0.80000         1.00000         1.80000        -8.83570
   0.00000      0.80000         1.00000         1.82500        -8.58979
   0.00000      0.80000         1.00000         1.85000        -8.35311
   0.00000      0.80000         1.00000         1.87500        -8.12515
   0.00000      0.80000         1.00000         1.90000        -7.90544
   0.00000      0.80000         1.00000         1.92500        -7.69355
   0.00000      0.80000         1.00000         1.95000        -7.48907
   0.00000      0.80000         1.00000         1.97500        -7.29162
   0.00000      0.80000         1.00000         2.00000        -7.10085
   0.00000      0.80000         1.00000         2.02500        -6.91643
   0.00000      0.80000         1.00000         2.05000        -6.73805
   0.00000      0.80000         1.00000         2.07500        -6.56543
   0.00000      0.80000         1.00000         2.10000        -6.39829
   0.00000      0.80000         1.00000         2.12500        -6.23638
   0.00000      0.80000         1.00000         2.15000        -6.07946
   0.00000      0.80000         1.00000         2.17500        -5.92730
   0.00000      0.80000         1.00000         2.20000        -5.77969
   0.00000      0.80000         1.00000         2.22500        -5.63645
   0.00000      0.80000         1.00000         2.25000        -5.49736
   0.00000      0.80000         1.00000         2.27500        -5.36227
   0.00000      0.80000         1.00000         2.30000        -5.23100
   0.00000      0.80000         1.00000         2.32500        -5.10340
   0.00000      0.80000         1.00000         2.35000        -4.97931
   0.00000      0.80000         1.00000         2.37500        -4.85860
   0.00000      0.80000         1.00000         2.40000        -4.74112
   0.00000      0.80000         1.00000         2.42500        -4.62676
   0.00000      0.80000         1.00000         2.45000        -4.51539
   0.00000      0.80000         1.00000         2.47500        -4.40690
   0.00000      0.80000         1.00000         2.50000        -4.30118
   0.00000      0.80000         1.00000         2.52500        -4.19813
   0.00000      0.80000         1.00000         2.55000        -4.09764
   0.00000      0.80000         1.00000         2.57500        -3.99963
   0.00000      0.80000         1.00000         2.60000        -3.90400
   0.00000      0.80000         1.00000         2.62500        -3.81067
   0.00000      0.80000         1.00000         2.65000        -3.71957
   0.00000      0.80000         1.00000         2.67500        -3.63061
   0.00000      0.80000         1.00000         2.70000        -3.54371
   0.00000      0.80000         1.00000         2.72500        -3.45882
   0.00000      0.80000         1.00000         2.75000        -3.37585
   0.00000      0.80000         1.00000         2.77500        -3.29476
   0.00000      0.80000         1.00000         2.80000        -3.21547
   0.00000      0.80000         1.00000         2.82500        -3.13793
   0.00000      0.80000         1.00000         2.85000        -3.06208
   0.00000      0.80000         1.00000         2.87500        -2.98786
   0.00000      0.80000         1.00000         2.90000        -2.91524
   0.00000      0.80000         1.00000         2.92500        -2.84415
   0.00000      0.80000         1.00000         2.95000        -2.77455
   0.00000      0.80000         1.00000         2.97500        -2.70639
   0.00000      0.80000         1.00000         3.00000        -2.63963
   0.00000      0.80000         1.00000         3.02500        -2.57423
   0.00000      0.80000         1.00000         3.05000        -2.51015
   0.00000      0.80000         1.00000         3.07500        -2.44735
   0.00000      0.80000         1.00000         3.10000        -2.38579
   0.00000      0.80000         1.00000         3.12500        -2.32544
   0.00000      0.80000         1.00000         3.15000        -2.26626
   0.00000      0.80000         1.00000         3.17500        -2.20821
   0.00000      0.80000         1.00000         3.20000        -2.15127
   0.00000      0.80000         1.00000         3.22500        -2.09541
   0.00000      0.80000         1.00000         3.25000        -2.04060
   0.00000      0.80000         1.00000         3.27500        -1.98680
   0.00000      0.80000         1.00000         3.30000        -1.93399
   0.00000      0.80000         1.00000         3.32500        -1.88215
   0.00000      0.80000         1.00000         3.35000        -1.83125
   0.00000      0.80000         1.00000         3.37500        -1.78126
   0.00000      0.80000         1.00000         3.40000        -1.73215
   0.00000      0.80000         1.00000         3.42500        -1.68392
   0.00000      0.80000         1.00000         3.45000        -1.63653
   0.00000      0.80000         1.00000         3.47500        -1.58996
   0.00000      0.80000         1.00000         3.50000        -1.54419
   0.00000      0.80000         1.00000         3.52500        -1.49921
   0.00000      0.80000         1.00000         3.55000        -1.45499
   0.00000      0.80000         1.00000         3.57500        -1.41151
   0.00000      0.80000         1.00000         3.60000        -1.36876
   0.00000      0.80000         1.00000         3.62500        -1.32672
   0.00000      0.80000         1.00000         3.65000        -1.28536
   0.00000      0.80000         1.00000         3.67500        -1.24469
   0.00000      0.80000         1.00000         3.70000        -1.20467
   0.00000      0.80000         1.00000         3.72500        -1.16529
   0.00000      0.80000         1.00000         3.75000        -1.12654
   0.00000      0.80000         1.00000         3.77500        -1.08841
   0.00000      0.80000         1.00000         3.80000        -1.05087
   0.00000      0.80000         1.00000         3.82500        -1.01392
   0.00000      0.80000         1.00000         3.85000        -0.97755
   0.00000      0.80000         1.00000         3.87500        -0.94173
   0.00000      0.80000         1.00000         3.90000        -0.90646
   0.00000      0.80000         1.00000         3.92500        -0.87173
   0.00000      0.80000         1.00000         3.95000        -0.83751
   0.00000      0.80000         1.00000         3.97500        -0.80382
   0.00000      0.80000         1.00000         4.00000        -0.77062
   0.00000      0.80000         1.00000         4.02500        -0.73791
   0.00000      0.80000         1.00000         4.05000        -0.70568
   0.00000      0.80000         1.00000         4.07500        -0.67392
   0.00000      0.80000         1.00000         4.10000        -0.64262
   0.00000      0.80000         1.00000         4.12500        -0.61177
   0.00000      0.80000         1.00000         4.15000        -0.58136
   0.00000      0.80000         1.00000         4.17500        -0.55139
   0.00000      0.80000         1.00000         4.20000        -0.52183
   0.00000      0.80000         1.00000         4.22500        -0.49269
   0.00000      0.80000         1.00000         4.25000        -0.46396
   0.00000      0.80000         1.00000         4.27500        -0.43562
   0.00000      0.80000         1.00000         4.30000        -0.40767
   0.00000      0.80000         1.00000         4.32500        -0.38010
   0.00000      0.80000         1.00000         4.35000        -0.35291
   0.00000      0.80000         1.00000         4.37500        -0.32609
   0.00000      0.80000         1.00000         4.40000        -0.29962
   0.00000      0.80000         1.00000         4.42500        -0.27351
   0.00000      0.80000         1.00000         4.45000        -0.24774
   0.00000      0.80000         1.00000         4.47500        -0.22232
   0.00000      0.80000         1.00000         4.50000        -0.19722
   0.00000      0.80000         1.00000         4.52500        -0.17246
   0.00000      0.80000         1.00000         4.55000        -0.14801
   0.00000      0.80000         1.00000         4.57500        -0.12388
   0.00000      0.80000         1.00000         4.60000        -0.10005
   0.00000      0.80000         1.00000         4.62500        -0.07653
   0.00000      0.80000         1.00000         4.65000        -0.05331
   0.00000      0.80000         1.00000         4.67500        -0.03038
   0.00000      0.80000         1.00000         4.70000        -0.00774
   0.00000      0.80000         1.00000         4.72500         0.01462
   0.00000      0.80000         1.00000         4.75000         0.03671
   0.00000      0.80000         1.00000         4.77500         0.05852
   0.00000      0.80000         1.00000         4.80000         0.08007
   0.00000      0.80000         1.00000         4.82500         0.10135
   0.00000      0.80000         1.00000         4.85000         0.12238
   0.00000      0.80000         1.00000         4.87500         0.14315
   0.00000      0.80000         1.00000         4.90000         0.16367
   0.00000      0.80000         1.00000         4.92500         0.18395
   0.00000      0.80000         1.00000         4.95000         0.20399
   0.00000      0.80000         1.00000         4.97500         0.22380
   0.00000      0.80000         1.00000         5.00000         0.24337
   0.00000      0.80000         1.00000         5.02500         0.26271
   0.00000      0.80000         1.00000         5.05000         0.28183
   0.00000      0.80000         1.00000         5.07500         0.30072
   0.00000      0.80000         1.00000         5.10000         0.31940
   0.00000      0.80000         1.00000         5.12500         0.33787
   0.00000      0.80000         1.00000         5.15000         0.35613
   0.00000      0.80000         1.00000         5.17500         0.37418
   0.00000      0.80000         1.00000         5.20000         0.39202
   0.00000      0.80000         1.00000         5.22500         0.40967
   0.00000      0.80000         1.00000         5.25000         0.42712
   0.00000      0.80000         1.00000         5.27500         0.44438
   0.00000      0.80000         1.00000         5.30000         0.46144
   0.00000      0.80000         1.00000         5.32500         0.47832
   0.00000      0.80000         1.00000         5.35000         0.49501
   0.00000      0.80000         1.00000         5.37500         0.51152
   0.00000      0.80000         1.00000         5.40000         0.52786
   0.00000      0.80000         1.00000         5.42500         0.54401
   0.00000      0.80000         1.00000         5.45000         0.55999
   0.00000      0.80000         1.00000         5.47500         0.57581
   0.00000      0.80000         1.00000         5.50000         0.59145
   0.00000      0.80000         1.00000         5.52500         0.60693
   0.00000      0.80000         1.00000         5.55000         0.62224
   0.00000      0.80000         2.00000         0.52500      -314.63791
   0.00000      0.80000         2.00000         0.55000      -247.31125
   0.00000      0.80000         2.00000         0.57500      -199.81683
   0.00000      0.80000         2.00000         0.60000      -165.20237
   0.00000      0.80000         2.00000         0.62500      -139.25343
   0.00000      0.80000         2.00000         0.65000      -119.31795
   0.00000      0.80000         2.00000         0.67500      -103.67097
   0.00000      0.80000         2.00000         0.70000       -91.15715
   0.00000      0.80000         2.00000         0.72500       -80.98210
   0.00000      0.80000         2.00000         0.75000       -72.58667
   0.00000      0.80000         2.00000         0.77500       -65.56886
   0.00000      0.80000         2.00000         0.80000       -59.63409
   0.00000      0.80000         2.00000         0.82500       -54.56277
   0.00000      0.80000         2.00000         0.85000       -50.18855
   0.00000      0.80000         2.00000         0.87500       -46.38367
   0.00000      0.80000         2.00000         0.90000       -43.04866
   0.00000      0.80000         2.00000         0.92500       -40.10514
   0.00000      0.80000         2.00000         0.95000       -37.49071
   0.00000      0.80000         2.00000         0.97500       -35.15513
   0.00000      0.80000         2.00000         1.00000       -33.05760
   0.00000      0.80000         2.00000         1.02500       -31.16468
   0.00000      0.80000         2.00000         1.05000       -29.44874
   0.00000      0.80000         2.00000         1.07500       -27.88681
   0.00000      0.80000         2.00000         1.10000       -26.45962
   0.00000      0.80000         2.00000         1.12500       -25.15089
   0.00000      0.80000         2.00000         1.15000       -23.94685
   0.00000      0.80000         2.00000         1.17500       -22.83569
   0.00000      0.80000         2.00000         1.20000       -21.80732
   0.00000      0.80000         2.00000         1.22500       -20.85301
   0.00000      0.80000         2.00000         1.25000       -19.96520
   0.00000      0.80000         2.00000         1.27500       -19.13730
   0.00000      0.80000         2.00000         1.30000       -18.36357
   0.00000      0.80000         2.00000         1.32500       -17.63894
   0.00000      0.80000         2.00000         1.35000       -16.95896
   0.00000      0.80000         2.00000         1.37500       -16.31971
   0.00000      0.80000         2.00000         1.40000       -15.71767
   0.00000      0.80000         2.00000         1.42500       -15.14975
   0.00000      0.80000         2.00000         1.45000       -14.61317
   0.00000      0.80000         2.00000         1.47500       -14.10543
   0.00000      0.80000         2.00000         1.50000       -13.62431
   0.00000      0.80000         2.00000         1.52500       -13.16779
   0.00000      0.80000         2.00000         1.55000       -12.73406
   0.00000      0.80000         2.00000         1.57500       -12.32147
   0.00000      0.80000         2.00000         1.60000       -11.92854
   0.00000      0.80000         2.00000         1.62500       -11.55391
   0.00000      0.80000         2.00000         1.65000       -11.19634
   0.00000      0.80000         2.00000         1.67500       -10.85471
   0.00000      0.80000         2.00000         1.70000       -10.52799
   0.00000      0.80000         2.00000         1.72500       -10.21523
   0.00000      0.80000         2.00000         1.75000        -9.91557
   0.00000      0.80000         2.00000         1.77500        -9.62821
   0.00000      0.80000         2.00000         1.80000        -9.35243
   0.00000      0.80000         2.00000         1.82500        -9.08753
   0.00000      0.80000         2.00000         1.85000        -8.83289
   0.00000      0.80000         2.00000         1.87500        -8.58795
   0.00000      0.80000         2.00000         1.90000        -8.35215
   0.00000      0.80000         2.00000         1.92500        -8.12500
   0.00000      0.80000         2.00000         1.95000        -7.90605
   0.00000      0.80000         2.00000         1.97500        -7.69485
   0.00000      0.80000         2.00000         2.00000        -7.49101
   0.00000      0.80000         2.00000         2.02500        -7.29416
   0.00000      0.80000         2.00000         2.05000        -7.10395
   0.00000      0.80000         2.00000         2.07500        -6.92004
   0.00000      0.80000         2.00000         2.10000        -6.74214
   0.00000      0.80000         2.00000         2.12500        -6.56996
   0.00000      0.80000         2.00000         2.15000        -6.40322
   0.00000      0.80000         2.00000         2.17500        -6.24169
   0.00000      0.80000         2.00000         2.20000        -6.08512
   0.00000      0.80000         2.00000         2.22500        -5.93328
   0.00000      0.80000         2.00000         2.25000        -5.78598
   0.00000      0.80000         2.00000         2.27500        -5.64301
   0.00000      0.80000         2.00000         2.30000        -5.50419
   0.00000      0.80000         2.00000         2.32500        -5.36933
   0.00000      0.80000         2.00000         2.35000        -5.23829
   0.00000      0.80000         2.00000         2.37500        -5.11089
   0.00000      0.80000         2.00000         2.40000        -4.98699
   0.00000      0.80000         2.00000         2.42500        -4.86645
   0.00000      0.80000         2.00000         2.45000        -4.74914
   0.00000      0.80000         2.00000         2.47500        -4.63493
   0.00000      0.80000         2.00000         2.50000        -4.52370
   0.00000      0.80000         2.00000         2.52500        -4.41533
   0.00000      0.80000         2.00000         2.55000        -4.30973
   0.00000      0.80000         2.00000         2.57500        -4.20678
   0.00000      0.80000         2.00000         2.60000        -4.10639
   0.00000      0.80000         2.00000         2.62500        -4.00847
   0.00000      0.80000         2.00000         2.65000        -3.91292
   0.00000      0.80000         2.00000         2.67500        -3.81967
   0.00000      0.80000         2.00000         2.70000        -3.72863
   0.00000      0.80000         2.00000         2.72500        -3.63973
   0.00000      0.80000         2.00000         2.75000        -3.55289
   0.00000      0.80000         2.00000         2.77500        -3.46805
   0.00000      0.80000         2.00000         2.80000        -3.38513
   0.00000      0.80000         2.00000         2.82500        -3.30407
   0.00000      0.80000         2.00000         2.85000        -3.22482
   0.00000      0.80000         2.00000         2.87500        -3.14731
   0.00000      0.80000         2.00000         2.90000        -3.07149
   0.00000      0.80000         2.00000         2.92500        -2.99730
   0.00000      0.80000         2.00000         2.95000        -2.92469
   0.00000      0.80000         2.00000         2.97500        -2.85361
   0.00000      0.80000         2.00000         3.00000        -2.78403
   0.00000      0.80000         2.00000         3.02500        -2.71588
   0.00000      0.80000         2.00000         3.05000        -2.64913
   0.00000      0.80000         2.00000         3.07500        -2.58373
   0.00000      0.80000         2.00000         3.10000        -2.51965
   0.00000      0.80000         2.00000         3.12500        -2.45685
   0.00000      0.80000         2.00000         3.15000        -2.39529
   0.00000      0.80000         2.00000         3.17500        -2.33493
   0.00000      0.80000         2.00000         3.20000        -2.27574
   0.00000      0.80000         2.00000         3.22500        -2.21769
   0.00000      0.80000         2.00000         3.25000        -2.16074
   0.00000      0.80000         2.00000         3.27500        -2.10486
   0.00000      0.80000         2.00000         3.30000        -2.05004
   0.00000      0.80000         2.00000         3.32500        -1.99622
   0.00000      0.80000         2.00000         3.35000        -1.94340
   0.00000      0.80000         2.00000         3.37500        -1.89154
   0.00000      0.80000         2.00000         3.40000        -1.84062
   0.00000      0.80000         2.00000         3.42500        -1.79060
   0.00000      0.80000         2.00000         3.45000        -1.74148
   0.00000      0.80000         2.00000         3.47500        -1.69322
   0.00000      0.80000         2.00000         3.50000        -1.64581
   0.00000      0.80000         2.00000         3.52500        -1.59922
   0.00000      0.80000         2.00000         3.55000        -1.55343
   0.00000      0.80000         2.00000         3.57500        -1.50842
   0.00000      0.80000         2.00000         3.60000        -1.46417
   0.00000      0.80000         2.00000         3.62500        -1.42067
   0.00000      0.80000         2.00000         3.65000        -1.37789
   0.00000      0.80000         2.00000         3.67500        -1.33582
   0.00000      0.80000         2.00000         3.70000        -1.29444
   0.00000      0.80000         2.00000         3.72500        -1.25373
   0.00000      0.80000         2.00000         3.75000        -1.21368
   0.00000      0.80000         2.00000         3.77500        -1.17428
   0.00000      0.80000         2.00000         3.80000        -1.13550
   0.00000      0.80000         2.00000         3.82500        -1.09734
   0.00000      0.80000         2.00000         3.85000        -1.05977
   0.00000      0.80000         2.00000         3.87500        -1.02279
   0.00000      0.80000         2.00000         3.90000        -0.98638
   0.00000      0.80000         2.00000         3.92500        -0.95053
   0.00000      0.80000         2.00000         3.95000        -0.91523
   0.00000      0.80000         2.00000         3.97500        -0.88047
   0.00000      0.80000         2.00000         4.00000        -0.84622
   0.00000      0.80000         2.00000         4.02500        -0.81249
   0.00000      0.80000         2.00000         4.05000        -0.77926
   0.00000      0.80000         2.00000         4.07500        -0.74652
   0.00000      0.80000         2.00000         4.10000        -0.71426
   0.00000      0.80000         2.00000         4.12500        -0.68247
   0.00000      0.80000         2.00000         4.15000        -0.65114
   0.00000      0.80000         2.00000         4.17500        -0.62026
   0.00000      0.80000         2.00000         4.20000        -0.58982
   0.00000      0.80000         2.00000         4.22500        -0.55981
   0.00000      0.80000         2.00000         4.25000        -0.53022
   0.00000      0.80000         2.00000         4.27500        -0.50104
   0.00000      0.80000         2.00000         4.30000        -0.47228
   0.00000      0.80000         2.00000         4.32500        -0.44391
   0.00000      0.80000         2.00000         4.35000        -0.41593
   0.00000      0.80000         2.00000         4.37500        -0.38833
   0.00000      0.80000         2.00000         4.40000        -0.36110
   0.00000      0.80000         2.00000         4.42500        -0.33425
   0.00000      0.80000         2.00000         4.45000        -0.30775
   0.00000      0.80000         2.00000         4.47500        -0.28160
   0.00000      0.80000         2.00000         4.50000        -0.25580
   0.00000      0.80000         2.00000         4.52500        -0.23035
   0.00000      0.80000         2.00000         4.55000        -0.20522
   0.00000      0.80000         2.00000         4.57500        -0.18042
   0.00000      0.80000         2.00000         4.60000        -0.15594
   0.00000      0.80000         2.00000         4.62500        -0.13178
   0.00000      0.80000         2.00000         4.65000        -0.10792
   0.00000      0.80000         2.00000         4.67500        -0.08437
   0.00000      0.80000         2.00000         4.70000        -0.06112
   0.00000      0.80000         2.00000         4.72500        -0.03816
   0.00000      0.80000         2.00000         4.75000        -0.01548
   0.00000      0.80000         2.00000         4.77500         0.00691
   0.00000      0.80000         2.00000         4.80000         0.02902
   0.00000      0.80000         2.00000         4.82500         0.05087
   0.00000      0.80000         2.00000         4.85000         0.07245
   0.00000      0.80000         2.00000         4.87500         0.09376
   0.00000      0.80000         2.00000         4.90000         0.11482
   0.00000      0.80000         2.00000         4.92500         0.13562
   0.00000      0.80000         2.00000         4.95000         0.15617
   0.00000      0.80000         2.00000         4.97500         0.17648
   0.00000      0.80000         2.00000         5.00000         0.19655
   0.00000      0.80000         2.00000         5.02500         0.21639
   0.00000      0.80000         2.00000         5.05000         0.23599
   0.00000      0.80000         2.00000         5.07500         0.25536
   0.00000      0.80000         2.00000         5.10000         0.27451
   0.00000      0.80000         2.00000         5.12500         0.29343
   0.00000      0.80000         2.00000         5.15000         0.31214
   0.00000      0.80000         2.00000         5.17500         0.33064
   0.00000      0.80000         2.00000         5.20000         0.34892
   0.00000      0.80000         2.00000         5.22500         0.36700
   0.00000      0.80000         2.00000         5.25000         0.38488
   0.00000      0.80000         2.00000         5.27500         0.40255
   0.00000      0.80000         2.00000         5.30000         0.42003
   0.00000      0.80000         2.00000         5.32500         0.43731
   0.00000      0.80000         2.00000         5.35000         0.45441
   0.00000      0.80000         2.00000         5.37500         0.47131
   0.00000      0.80000         2.00000         5.40000         0.48803
   0.00000      0.80000         2.00000         5.42500         0.50457
   0.00000      0.80000         2.00000         5.45000         0.52093
   0.00000      0.80000         2.00000         5.47500         0.53711
   0.00000      0.80000         2.00000         5.50000         0.55312
   0.00000      0.80000         2.00000         5.52500         0.56896
   0.00000      0.80000         2.00000         5.55000         0.58463
   0.00000      0.80000         2.00000         5.57500         0.60014
   0.00000      0.80000         2.00000         5.60000         0.61548
   0.00000      0.80000         2.00000         5.62500         0.63066
   0.00000      0.80000         2.00000         5.65000         0.64568
   0.00000      0.80000         2.00000         5.67500         0.66055
   0.00000      0.80000         3.00000         0.60000      -265.83732
   0.00000      0.80000         3.00000         0.62500      -214.79671
   0.00000      0.80000         3.00000         0.65000      -177.42155
   0.00000      0.80000         3.00000         0.67500      -149.32443
   0.00000      0.80000         3.00000         0.70000      -127.70840
   0.00000      0.80000         3.00000         0.72500      -110.73592
   0.00000      0.80000         3.00000         0.75000       -97.16669
   0.00000      0.80000         3.00000         0.77500       -86.14292
   0.00000      0.80000         3.00000         0.80000       -77.05819
   0.00000      0.80000         3.00000         0.82500       -69.47513
   0.00000      0.80000         3.00000         0.85000       -63.07254
   0.00000      0.80000         3.00000         0.87500       -57.61061
   0.00000      0.80000         3.00000         0.90000       -52.90755
   0.00000      0.80000         3.00000         0.92500       -48.82365
   0.00000      0.80000         3.00000         0.95000       -45.25017
   0.00000      0.80000         3.00000         0.97500       -42.10145
   0.00000      0.80000         3.00000         1.00000       -39.30930
   0.00000      0.80000         3.00000         1.02500       -36.81888
   0.00000      0.80000         3.00000         1.05000       -34.58569
   0.00000      0.80000         3.00000         1.07500       -32.57329
   0.00000      0.80000         3.00000         1.10000       -30.75161
   0.00000      0.80000         3.00000         1.12500       -29.09566
   0.00000      0.80000         3.00000         1.15000       -27.58451
   0.00000      0.80000         3.00000         1.17500       -26.20051
   0.00000      0.80000         3.00000         1.20000       -24.92871
   0.00000      0.80000         3.00000         1.22500       -23.75637
   0.00000      0.80000         3.00000         1.25000       -22.67254
   0.00000      0.80000         3.00000         1.27500       -21.66782
   0.00000      0.80000         3.00000         1.30000       -20.73403
   0.00000      0.80000         3.00000         1.32500       -19.86409
   0.00000      0.80000         3.00000         1.35000       -19.05181
   0.00000      0.80000         3.00000         1.37500       -18.29175
   0.00000      0.80000         3.00000         1.40000       -17.57913
   0.00000      0.80000         3.00000         1.42500       -16.90972
   0.00000      0.80000         3.00000         1.45000       -16.27978
   0.00000      0.80000         3.00000         1.47500       -15.68597
   0.00000      0.80000         3.00000         1.50000       -15.12534
   0.00000      0.80000         3.00000         1.52500       -14.59521
   0.00000      0.80000         3.00000         1.55000       -14.09321
   0.00000      0.80000         3.00000         1.57500       -13.61718
   0.00000      0.80000         3.00000         1.60000       -13.16519
   0.00000      0.80000         3.00000         1.62500       -12.73550
   0.00000      0.80000         3.00000         1.65000       -12.32651
   0.00000      0.80000         3.00000         1.67500       -11.93679
   0.00000      0.80000         3.00000         1.70000       -11.56501
   0.00000      0.80000         3.00000         1.72500       -11.21000
   0.00000      0.80000         3.00000         1.75000       -10.87065
   0.00000      0.80000         3.00000         1.77500       -10.54596
   0.00000      0.80000         3.00000         1.80000       -10.23502
   0.00000      0.80000         3.00000         1.82500        -9.93698
   0.00000      0.80000         3.00000         1.85000        -9.65107
   0.00000      0.80000         3.00000         1.87500        -9.37656
   0.00000      0.80000         3.00000         1.90000        -9.11280
   0.00000      0.80000         3.00000         1.92500        -8.85918
   0.00000      0.80000         3.00000         1.95000        -8.61513
   0.00000      0.80000         3.00000         1.97500        -8.38012
   0.00000      0.80000         3.00000         2.00000        -8.15368
   0.00000      0.80000         3.00000         2.02500        -7.93533
   0.00000      0.80000         3.00000         2.05000        -7.72467
   0.00000      0.80000         3.00000         2.07500        -7.52130
   0.00000      0.80000         3.00000         2.10000        -7.32485
   0.00000      0.80000         3.00000         2.12500        -7.13498
   0.00000      0.80000         3.00000         2.15000        -6.95137
   0.00000      0.80000         3.00000         2.17500        -6.77371
   0.00000      0.80000         3.00000         2.20000        -6.60173
   0.00000      0.80000         3.00000         2.22500        -6.43516
   0.00000      0.80000         3.00000         2.25000        -6.27376
   0.00000      0.80000         3.00000         2.27500        -6.11728
   0.00000      0.80000         3.00000         2.30000        -5.96552
   0.00000      0.80000         3.00000         2.32500        -5.81825
   0.00000      0.80000         3.00000         2.35000        -5.67530
   0.00000      0.80000         3.00000         2.37500        -5.53647
   0.00000      0.80000         3.00000         2.40000        -5.40159
   0.00000      0.80000         3.00000         2.42500        -5.27051
   0.00000      0.80000         3.00000         2.45000        -5.14305
   0.00000      0.80000         3.00000         2.47500        -5.01907
   0.00000      0.80000         3.00000         2.50000        -4.89845
   0.00000      0.80000         3.00000         2.52500        -4.78104
   0.00000      0.80000         3.00000         2.55000        -4.66671
   0.00000      0.80000         3.00000         2.57500        -4.55536
   0.00000      0.80000         3.00000         2.60000        -4.44687
   0.00000      0.80000         3.00000         2.62500        -4.34113
   0.00000      0.80000         3.00000         2.65000        -4.23804
   0.00000      0.80000         3.00000         2.67500        -4.13750
   0.00000      0.80000         3.00000         2.70000        -4.03942
   0.00000      0.80000         3.00000         2.72500        -3.94371
   0.00000      0.80000         3.00000         2.75000        -3.85029
   0.00000      0.80000         3.00000         2.77500        -3.75908
   0.00000      0.80000         3.00000         2.80000        -3.67001
   0.00000      0.80000         3.00000         2.82500        -3.58299
   0.00000      0.80000         3.00000         2.85000        -3.49797
   0.00000      0.80000         3.00000         2.87500        -3.41487
   0.00000      0.80000         3.00000         2.90000        -3.33363
   0.00000      0.80000         3.00000         2.92500        -3.25419
   0.00000      0.80000         3.00000         2.95000        -3.17649
   0.00000      0.80000         3.00000         2.97500        -3.10048
   0.00000      0.80000         3.00000         3.00000        -3.02610
   0.00000      0.80000         3.00000         3.02500        -2.95330
   0.00000      0.80000         3.00000         3.05000        -2.88203
   0.00000      0.80000         3.00000         3.07500        -2.81226
   0.00000      0.80000         3.00000         3.10000        -2.74392
   0.00000      0.80000         3.00000         3.12500        -2.67698
   0.00000      0.80000         3.00000         3.15000        -2.61139
   0.00000      0.80000         3.00000         3.17500        -2.54712
   0.00000      0.80000         3.00000         3.20000        -2.48413
   0.00000      0.80000         3.00000         3.22500        -2.42238
   0.00000      0.80000         3.00000         3.25000        -2.36183
   0.00000      0.80000         3.00000         3.27500        -2.30245
   0.00000      0.80000         3.00000         3.30000        -2.24421
   0.00000      0.80000         3.00000         3.32500        -2.18708
   0.00000      0.80000         3.00000         3.35000        -2.13102
   0.00000      0.80000         3.00000         3.37500        -2.07601
   0.00000      0.80000         3.00000         3.40000        -2.02201
   0.00000      0.80000         3.00000         3.42500        -1.96901
   0.00000      0.80000         3.00000         3.45000        -1.91697
   0.00000      0.80000         3.00000         3.47500        -1.86586
   0.00000      0.80000         3.00000         3.50000        -1.81568
   0.00000      0.80000         3.00000         3.52500        -1.76638
   0.00000      0.80000         3.00000         3.55000        -1.71794
   0.00000      0.80000         3.00000         3.57500        -1.67036
   0.00000      0.80000         3.00000         3.60000        -1.62359
   0.00000      0.80000         3.00000         3.62500        -1.57763
   0.00000      0.80000         3.00000         3.65000        -1.53245
   0.00000      0.80000         3.00000         3.67500        -1.48804
   0.00000      0.80000         3.00000         3.70000        -1.44437
   0.00000      0.80000         3.00000         3.72500        -1.40143
   0.00000      0.80000         3.00000         3.75000        -1.35919
   0.00000      0.80000         3.00000         3.77500        -1.31765
   0.00000      0.80000         3.00000         3.80000        -1.27678
   0.00000      0.80000         3.00000         3.82500        -1.23657
   0.00000      0.80000         3.00000         3.85000        -1.19701
   0.00000      0.80000         3.00000         3.87500        -1.15808
   0.00000      0.80000         3.00000         3.90000        -1.11976
   0.00000      0.80000         3.00000         3.92500        -1.08204
   0.00000      0.80000         3.00000         3.95000        -1.04491
   0.00000      0.80000         3.00000         3.97500        -1.00835
   0.00000      0.80000         3.00000         4.00000        -0.97235
   0.00000      0.80000         3.00000         4.02500        -0.93690
   0.00000      0.80000         3.00000         4.05000        -0.90199
   0.00000      0.80000         3.00000         4.07500        -0.86761
   0.00000      0.80000         3.00000         4.10000        -0.83373
   0.00000      0.80000         3.00000         4.12500        -0.80036
   0.00000      0.80000         3.00000         4.15000        -0.76748
   0.00000      0.80000         3.00000         4.17500        -0.73508
   0.00000      0.80000         3.00000         4.20000        -0.70315
   0.00000      0.80000         3.00000         4.22500        -0.67168
   0.00000      0.80000         3.00000         4.25000        -0.64067
   0.00000      0.80000         3.00000         4.27500        -0.61009
   0.00000      0.80000         3.00000         4.30000        -0.57995
   0.00000      0.80000         3.00000         4.32500        -0.55023
   0.00000      0.80000         3.00000         4.35000        -0.52093
   0.00000      0.80000         3.00000         4.37500        -0.49203
   0.00000      0.80000         3.00000         4.40000        -0.46354
   0.00000      0.80000         3.00000         4.42500        -0.43543
   0.00000      0.80000         3.00000         4.45000        -0.40771
   0.00000      0.80000         3.00000         4.47500        -0.38036
   0.00000      0.80000         3.00000         4.50000        -0.35338
   0.00000      0.80000         3.00000         4.52500        -0.32676
   0.00000      0.80000         3.00000         4.55000        -0.30050
   0.00000      0.80000         3.00000         4.57500        -0.27458
   0.00000      0.80000         3.00000         4.60000        -0.24901
   0.00000      0.80000         3.00000         4.62500        -0.22376
   0.00000      0.80000         3.00000         4.65000        -0.19885
   0.00000      0.80000         3.00000         4.67500        -0.17426
   0.00000      0.80000         3.00000         4.70000        -0.14998
   0.00000      0.80000         3.00000         4.72500        -0.12602
   0.00000      0.80000         3.00000         4.75000        -0.10236
   0.00000      0.80000         3.00000         4.77500        -0.07899
   0.00000      0.80000         3.00000         4.80000        -0.05592
   0.00000      0.80000         3.00000         4.82500        -0.03314
   0.00000      0.80000         3.00000         4.85000        -0.01064
   0.00000      0.80000         3.00000         4.87500         0.01158
   0.00000      0.80000         3.00000         4.90000         0.03352
   0.00000      0.80000         3.00000         4.92500         0.05520
   0.00000      0.80000         3.00000         4.95000         0.07662
   0.00000      0.80000         3.00000         4.97500         0.09778
   0.00000      0.80000         3.00000         5.00000         0.11868
   0.00000      0.80000         3.00000         5.02500         0.13933
   0.00000      0.80000         3.00000         5.05000         0.15974
   0.00000      0.80000         3.00000         5.07500         0.17991
   0.00000      0.80000         3.00000         5.10000         0.19984
   0.00000      0.80000         3.00000         5.12500         0.21953
   0.00000      0.80000         3.00000         5.15000         0.23900
   0.00000      0.80000         3.00000         5.17500         0.25824
   0.00000      0.80000         3.00000         5.20000         0.27726
   0.00000      0.80000         3.00000         5.22500         0.29606
   0.00000      0.80000         3.00000         5.25000         0.31464
   0.00000      0.80000         3.00000         5.27500         0.33302
   0.00000      0.80000         3.00000         5.30000         0.35119
   0.00000      0.80000         3.00000         5.32500         0.36915
   0.00000      0.80000         3.00000         5.35000         0.38691
   0.00000      0.80000         3.00000         5.37500         0.40448
   0.00000      0.80000         3.00000         5.40000         0.42185
   0.00000      0.80000         3.00000         5.42500         0.43902
   0.00000      0.80000         3.00000         5.45000         0.45601
   0.00000      0.80000         3.00000         5.47500         0.47282
   0.00000      0.80000         3.00000         5.50000         0.48944
   0.00000      0.80000         3.00000         5.52500         0.50588
   0.00000      0.80000         3.00000         5.55000         0.52214
   0.00000      0.80000         3.00000         5.57500         0.53823
   0.00000      0.80000         3.00000         5.60000         0.55415
   0.00000      0.80000         3.00000         5.62500         0.56990
   0.00000      0.80000         3.00000         5.65000         0.58548
   0.00000      0.80000         3.00000         5.67500         0.60090
   0.00000      0.80000         3.00000         5.70000         0.61616
   0.00000      0.80000         3.00000         5.72500         0.63126
   0.00000      0.80000         3.00000         5.75000         0.64620
   0.00000      0.80000         3.00000         5.77500         0.66098
   0.00000      0.80000         4.00000         0.67500      -246.79035
   0.00000      0.80000         4.00000         0.70000      -203.11021
   0.00000      0.80000         4.00000         0.72500      -170.24952
   0.00000      0.80000         4.00000         0.75000      -144.98362
   0.00000      0.80000         4.00000         0.77500      -125.17601
   0.00000      0.80000         4.00000         0.80000      -109.37545
   0.00000      0.80000         4.00000         0.82500       -96.57362
   0.00000      0.80000         4.00000         0.85000       -86.05540
   0.00000      0.80000         4.00000         0.87500       -77.30398
   0.00000      0.80000         4.00000         0.90000       -69.93938
   0.00000      0.80000         4.00000         0.92500       -63.67781
   0.00000      0.80000         4.00000         0.95000       -58.30418
   0.00000      0.80000         4.00000         0.97500       -53.65332
   0.00000      0.80000         4.00000         1.00000       -49.59680
   0.00000      0.80000         4.00000         1.02500       -46.03361
   0.00000      0.80000         4.00000         1.05000       -42.88345
   0.00000      0.80000         4.00000         1.07500       -40.08190
   0.00000      0.80000         4.00000         1.10000       -37.57673
   0.00000      0.80000         4.00000         1.12500       -35.32531
   0.00000      0.80000         4.00000         1.15000       -33.29252
   0.00000      0.80000         4.00000         1.17500       -31.44922
   0.00000      0.80000         4.00000         1.20000       -29.77106
   0.00000      0.80000         4.00000         1.22500       -28.23759
   0.00000      0.80000         4.00000         1.25000       -26.83149
   0.00000      0.80000         4.00000         1.27500       -25.53803
   0.00000      0.80000         4.00000         1.30000       -24.34460
   0.00000      0.80000         4.00000         1.32500       -23.24036
   0.00000      0.80000         4.00000         1.35000       -22.21596
   0.00000      0.80000         4.00000         1.37500       -21.26327
   0.00000      0.80000         4.00000         1.40000       -20.37520
   0.00000      0.80000         4.00000         1.42500       -19.54556
   0.00000      0.80000         4.00000         1.45000       -18.76889
   0.00000      0.80000         4.00000         1.47500       -18.04040
   0.00000      0.80000         4.00000         1.50000       -17.35584
   0.00000      0.80000         4.00000         1.52500       -16.71143
   0.00000      0.80000         4.00000         1.55000       -16.10381
   0.00000      0.80000         4.00000         1.57500       -15.52999
   0.00000      0.80000         4.00000         1.60000       -14.98727
   0.00000      0.80000         4.00000         1.62500       -14.47323
   0.00000      0.80000         4.00000         1.65000       -13.98572
   0.00000      0.80000         4.00000         1.67500       -13.52275
   0.00000      0.80000         4.00000         1.70000       -13.08256
   0.00000      0.80000         4.00000         1.72500       -12.66353
   0.00000      0.80000         4.00000         1.75000       -12.26420
   0.00000      0.80000         4.00000         1.77500       -11.88323
   0.00000      0.80000         4.00000         1.80000       -11.51941
   0.00000      0.80000         4.00000         1.82500       -11.17162
   0.00000      0.80000         4.00000         1.85000       -10.83885
   0.00000      0.80000         4.00000         1.87500       -10.52015
   0.00000      0.80000         4.00000         1.90000       -10.21467
   0.00000      0.80000         4.00000         1.92500        -9.92161
   0.00000      0.80000         4.00000         1.95000        -9.64024
   0.00000      0.80000         4.00000         1.97500        -9.36988
   0.00000      0.80000         4.00000         2.00000        -9.10992
   0.00000      0.80000         4.00000         2.02500        -8.85977
   0.00000      0.80000         4.00000         2.05000        -8.61890
   0.00000      0.80000         4.00000         2.07500        -8.38680
   0.00000      0.80000         4.00000         2.10000        -8.16301
   0.00000      0.80000         4.00000         2.12500        -7.94711
   0.00000      0.80000         4.00000         2.15000        -7.73868
   0.00000      0.80000         4.00000         2.17500        -7.53735
   0.00000      0.80000         4.00000         2.20000        -7.34277
   0.00000      0.80000         4.00000         2.22500        -7.15462
   0.00000      0.80000         4.00000         2.25000        -6.97257
   0.00000      0.80000         4.00000         2.27500        -6.79635
   0.00000      0.80000         4.00000         2.30000        -6.62569
   0.00000      0.80000         4.00000         2.32500        -6.46032
   0.00000      0.80000         4.00000         2.35000        -6.30001
   0.00000      0.80000         4.00000         2.37500        -6.14454
   0.00000      0.80000         4.00000         2.40000        -5.99369
   0.00000      0.80000         4.00000         2.42500        -5.84726
   0.00000      0.80000         4.00000         2.45000        -5.70506
   0.00000      0.80000         4.00000         2.47500        -5.56692
   0.00000      0.80000         4.00000         2.50000        -5.43267
   0.00000      0.80000         4.00000         2.52500        -5.30215
   0.00000      0.80000         4.00000         2.55000        -5.17520
   0.00000      0.80000         4.00000         2.57500        -5.05168
   0.00000      0.80000         4.00000         2.60000        -4.93147
   0.00000      0.80000         4.00000         2.62500        -4.81443
   0.00000      0.80000         4.00000         2.65000        -4.70043
   0.00000      0.80000         4.00000         2.67500        -4.58937
   0.00000      0.80000         4.00000         2.70000        -4.48113
   0.00000      0.80000         4.00000         2.72500        -4.37562
   0.00000      0.80000         4.00000         2.75000        -4.27272
   0.00000      0.80000         4.00000         2.77500        -4.17234
   0.00000      0.80000         4.00000         2.80000        -4.07441
   0.00000      0.80000         4.00000         2.82500        -3.97882
   0.00000      0.80000         4.00000         2.85000        -3.88549
   0.00000      0.80000         4.00000         2.87500        -3.79436
   0.00000      0.80000         4.00000         2.90000        -3.70534
   0.00000      0.80000         4.00000         2.92500        -3.61836
   0.00000      0.80000         4.00000         2.95000        -3.53335
   0.00000      0.80000         4.00000         2.97500        -3.45026
   0.00000      0.80000         4.00000         3.00000        -3.36901
   0.00000      0.80000         4.00000         3.02500        -3.28954
   0.00000      0.80000         4.00000         3.05000        -3.21181
   0.00000      0.80000         4.00000         3.07500        -3.13575
   0.00000      0.80000         4.00000         3.10000        -3.06132
   0.00000      0.80000         4.00000         3.12500        -2.98845
   0.00000      0.80000         4.00000         3.15000        -2.91711
   0.00000      0.80000         4.00000         3.17500        -2.84725
   0.00000      0.80000         4.00000         3.20000        -2.77882
   0.00000      0.80000         4.00000         3.22500        -2.71178
   0.00000      0.80000         4.00000         3.25000        -2.64609
   0.00000      0.80000         4.00000         3.27500        -2.58171
   0.00000      0.80000         4.00000         3.30000        -2.51860
   0.00000      0.80000         4.00000         3.32500        -2.45673
   0.00000      0.80000         4.00000         3.35000        -2.39606
   0.00000      0.80000         4.00000         3.37500        -2.33655
   0.00000      0.80000         4.00000         3.40000        -2.27817
   0.00000      0.80000         4.00000         3.42500        -2.22090
   0.00000      0.80000         4.00000         3.45000        -2.16470
   0.00000      0.80000         4.00000         3.47500        -2.10954
   0.00000      0.80000         4.00000         3.50000        -2.05540
   0.00000      0.80000         4.00000         3.52500        -2.00225
   0.00000      0.80000         4.00000         3.55000        -1.95005
   0.00000      0.80000         4.00000         3.57500        -1.89880
   0.00000      0.80000         4.00000         3.60000        -1.84845
   0.00000      0.80000         4.00000         3.62500        -1.79899
   0.00000      0.80000         4.00000         3.65000        -1.75040
   0.00000      0.80000         4.00000         3.67500        -1.70266
   0.00000      0.80000         4.00000         3.70000        -1.65573
   0.00000      0.80000         4.00000         3.72500        -1.60961
   0.00000      0.80000         4.00000         3.75000        -1.56427
   0.00000      0.80000         4.00000         3.77500        -1.51969
   0.00000      0.80000         4.00000         3.80000        -1.47585
   0.00000      0.80000         4.00000         3.82500        -1.43274
   0.00000      0.80000         4.00000         3.85000        -1.39034
   0.00000      0.80000         4.00000         3.87500        -1.34864
   0.00000      0.80000         4.00000         3.90000        -1.30760
   0.00000      0.80000         4.00000         3.92500        -1.26723
   0.00000      0.80000         4.00000         3.95000        -1.22750
   0.00000      0.80000         4.00000         3.97500        -1.18840
   0.00000      0.80000         4.00000         4.00000        -1.14992
   0.00000      0.80000         4.00000         4.02500        -1.11203
   0.00000      0.80000         4.00000         4.05000        -1.07474
   0.00000      0.80000         4.00000         4.07500        -1.03801
   0.00000      0.80000         4.00000         4.10000        -1.00185
   0.00000      0.80000         4.00000         4.12500        -0.96624
   0.00000      0.80000         4.00000         4.15000        -0.93117
   0.00000      0.80000         4.00000         4.17500        -0.89662
   0.00000      0.80000         4.00000         4.20000        -0.86258
   0.00000      0.80000         4.00000         4.22500        -0.82905
   0.00000      0.80000         4.00000         4.25000        -0.79601
   0.00000      0.80000         4.00000         4.27500        -0.76345
   0.00000      0.80000         4.00000         4.30000        -0.73136
   0.00000      0.80000         4.00000         4.32500        -0.69974
   0.00000      0.80000         4.00000         4.35000        -0.66856
   0.00000      0.80000         4.00000         4.37500        -0.63783
   0.00000      0.80000         4.00000         4.40000        -0.60753
   0.00000      0.80000         4.00000         4.42500        -0.57766
   0.00000      0.80000         4.00000         4.45000        -0.54821
   0.00000      0.80000         4.00000         4.47500        -0.51916
   0.00000      0.80000         4.00000         4.50000        -0.49051
   0.00000      0.80000         4.00000         4.52500        -0.46225
   0.00000      0.80000         4.00000         4.55000        -0.43438
   0.00000      0.80000         4.00000         4.57500        -0.40688
   0.00000      0.80000         4.00000         4.60000        -0.37975
   0.00000      0.80000         4.00000         4.62500        -0.35299
   0.00000      0.80000         4.00000         4.65000        -0.32658
   0.00000      0.80000         4.00000         4.67500        -0.30052
   0.00000      0.80000         4.00000         4.70000        -0.27480
   0.00000      0.80000         4.00000         4.72500        -0.24941
   0.00000      0.80000         4.00000         4.75000        -0.22436
   0.00000      0.80000         4.00000         4.77500        -0.19962
   0.00000      0.80000         4.00000         4.80000        -0.17521
   0.00000      0.80000         4.00000         4.82500        -0.15110
   0.00000      0.80000         4.00000         4.85000        -0.12730
   0.00000      0.80000         4.00000         4.87500        -0.10380
   0.00000      0.80000         4.00000         4.90000        -0.08060
   0.00000      0.80000         4.00000         4.92500        -0.05768
   0.00000      0.80000         4.00000         4.95000        -0.03505
   0.00000      0.80000         4.00000         4.97500        -0.01270
   0.00000      0.80000         4.00000         5.00000         0.00938
   0.00000      0.80000         4.00000         5.02500         0.03119
   0.00000      0.80000         4.00000         5.05000         0.05274
   0.00000      0.80000         4.00000         5.07500         0.07403
   0.00000      0.80000         4.00000         5.10000         0.09506
   0.00000      0.80000         4.00000         5.12500         0.11584
   0.00000      0.80000         4.00000         5.15000         0.13637
   0.00000      0.80000         4.00000         5.17500         0.15666
   0.00000      0.80000         4.00000         5.20000         0.17672
   0.00000      0.80000         4.00000         5.22500         0.19654
   0.00000      0.80000         4.00000         5.25000         0.21612
   0.00000      0.80000         4.00000         5.27500         0.23549
   0.00000      0.80000         4.00000         5.30000         0.25463
   0.00000      0.80000         4.00000         5.32500         0.27355
   0.00000      0.80000         4.00000         5.35000         0.29225
   0.00000      0.80000         4.00000         5.37500         0.31074
   0.00000      0.80000         4.00000         5.40000         0.32903
   0.00000      0.80000         4.00000         5.42500         0.34711
   0.00000      0.80000         4.00000         5.45000         0.36498
   0.00000      0.80000         4.00000         5.47500         0.38266
   0.00000      0.80000         4.00000         5.50000         0.40014
   0.00000      0.80000         4.00000         5.52500         0.41743
   0.00000      0.80000         4.00000         5.55000         0.43453
   0.00000      0.80000         4.00000         5.57500         0.45145
   0.00000      0.80000         4.00000         5.60000         0.46818
   0.00000      0.80000         4.00000         5.62500         0.48473
   0.00000      0.80000         4.00000         5.65000         0.50110
   0.00000      0.80000         4.00000         5.67500         0.51730
   0.00000      0.80000         4.00000         5.70000         0.53332
   0.00000      0.80000         4.00000         5.72500         0.54917
   0.00000      0.80000         4.00000         5.75000         0.56486
   0.00000      0.80000         4.00000         5.77500         0.58038
   0.00000      0.80000         4.00000         5.80000         0.59574
   0.00000      0.80000         4.00000         5.82500         0.61094
   0.00000      0.80000         4.00000         5.85000         0.62598
   0.00000      0.80000         4.00000         5.87500         0.64087
   0.00000      0.80000         4.00000         5.90000         0.65561
   0.00000      0.80000         4.00000         5.92500         0.67019
   0.00000      0.80000         4.00000         5.95000         0.68462
   0.00000      0.80000         4.00000         5.97500         0.69891
   0.00000      0.80000         4.00000         6.00000         0.71306
   0.00000      0.80000         4.00000         6.02500         0.72706
   0.00000      0.80000         6.00000         0.67500      -995.47117
   0.00000      0.80000         6.00000         0.70000      -740.38225
   0.00000      0.80000         6.00000         0.72500      -566.23657
   0.00000      0.80000         6.00000         0.75000      -443.88002
   0.00000      0.80000         6.00000         0.77500      -355.65442
   0.00000      0.80000         6.00000         0.80000      -290.53349
   0.00000      0.80000         6.00000         0.82500      -241.43859
   0.00000      0.80000         6.00000         0.85000      -203.70916
   0.00000      0.80000         6.00000         0.87500      -174.20493
   0.00000      0.80000         6.00000         0.90000      -150.76469
   0.00000      0.80000         6.00000         0.92500      -131.87180
   0.00000      0.80000         6.00000         0.95000      -116.44265
   0.00000      0.80000         6.00000         0.97500      -103.69012
   0.00000      0.80000         6.00000         1.00000       -93.03357
   0.00000      0.80000         6.00000         1.02500       -84.03858
   0.00000      0.80000         6.00000         1.05000       -76.37579
   0.00000      0.80000         6.00000         1.07500       -69.79243
   0.00000      0.80000         6.00000         1.10000       -64.09223
   0.00000      0.80000         6.00000         1.12500       -59.12122
   0.00000      0.80000         6.00000         1.15000       -54.75733
   0.00000      0.80000         6.00000         1.17500       -50.90295
   0.00000      0.80000         6.00000         1.20000       -47.47928
   0.00000      0.80000         6.00000         1.22500       -44.42221
   0.00000      0.80000         6.00000         1.25000       -41.67920
   0.00000      0.80000         6.00000         1.27500       -39.20681
   0.00000      0.80000         6.00000         1.30000       -36.96896
   0.00000      0.80000         6.00000         1.32500       -34.93544
   0.00000      0.80000         6.00000         1.35000       -33.08081
   0.00000      0.80000         6.00000         1.37500       -31.38354
   0.00000      0.80000         6.00000         1.40000       -29.82528
   0.00000      0.80000         6.00000         1.42500       -28.39035
   0.00000      0.80000         6.00000         1.45000       -27.06525
   0.00000      0.80000         6.00000         1.47500       -25.83832
   0.00000      0.80000         6.00000         1.50000       -24.69946
   0.00000      0.80000         6.00000         1.52500       -23.63985
   0.00000      0.80000         6.00000         1.55000       -22.65178
   0.00000      0.80000         6.00000         1.57500       -21.72849
   0.00000      0.80000         6.00000         1.60000       -20.86401
   0.00000      0.80000         6.00000         1.62500       -20.05309
   0.00000      0.80000         6.00000         1.65000       -19.29104
   0.00000      0.80000         6.00000         1.67500       -18.57371
   0.00000      0.80000         6.00000         1.70000       -17.89739
   0.00000      0.80000         6.00000         1.72500       -17.25875
   0.00000      0.80000         6.00000         1.75000       -16.65483
   0.00000      0.80000         6.00000         1.77500       -16.08294
   0.00000      0.80000         6.00000         1.80000       -15.54066
   0.00000      0.80000         6.00000         1.82500       -15.02582
   0.00000      0.80000         6.00000         1.85000       -14.53643
   0.00000      0.80000         6.00000         1.87500       -14.07071
   0.00000      0.80000         6.00000         1.90000       -13.62701
   0.00000      0.80000         6.00000         1.92500       -13.20386
   0.00000      0.80000         6.00000         1.95000       -12.79988
   0.00000      0.80000         6.00000         1.97500       -12.41383
   0.00000      0.80000         6.00000         2.00000       -12.04458
   0.00000      0.80000         6.00000         2.02500       -11.69108
   0.00000      0.80000         6.00000         2.05000       -11.35236
   0.00000      0.80000         6.00000         2.07500       -11.02753
   0.00000      0.80000         6.00000         2.10000       -10.71579
   0.00000      0.80000         6.00000         2.12500       -10.41636
   0.00000      0.80000         6.00000         2.15000       -10.12855
   0.00000      0.80000         6.00000         2.17500        -9.85171
   0.00000      0.80000         6.00000         2.20000        -9.58525
   0.00000      0.80000         6.00000         2.22500        -9.32859
   0.00000      0.80000         6.00000         2.25000        -9.08123
   0.00000      0.80000         6.00000         2.27500        -8.84266
   0.00000      0.80000         6.00000         2.30000        -8.61246
   0.00000      0.80000         6.00000         2.32500        -8.39018
   0.00000      0.80000         6.00000         2.35000        -8.17544
   0.00000      0.80000         6.00000         2.37500        -7.96787
   0.00000      0.80000         6.00000         2.40000        -7.76712
   0.00000      0.80000         6.00000         2.42500        -7.57288
   0.00000      0.80000         6.00000         2.45000        -7.38483
   0.00000      0.80000         6.00000         2.47500        -7.20268
   0.00000      0.80000         6.00000         2.50000        -7.02618
   0.00000      0.80000         6.00000         2.52500        -6.85507
   0.00000      0.80000         6.00000         2.55000        -6.68911
   0.00000      0.80000         6.00000         2.57500        -6.52808
   0.00000      0.80000         6.00000         2.60000        -6.37176
   0.00000      0.80000         6.00000         2.62500        -6.21996
   0.00000      0.80000         6.00000         2.65000        -6.07249
   0.00000      0.80000         6.00000         2.67500        -5.92916
   0.00000      0.80000         6.00000         2.70000        -5.78981
   0.00000      0.80000         6.00000         2.72500        -5.65429
   0.00000      0.80000         6.00000         2.75000        -5.52243
   0.00000      0.80000         6.00000         2.77500        -5.39410
   0.00000      0.80000         6.00000         2.80000        -5.26916
   0.00000      0.80000         6.00000         2.82500        -5.14747
   0.00000      0.80000         6.00000         2.85000        -5.02893
   0.00000      0.80000         6.00000         2.87500        -4.91340
   0.00000      0.80000         6.00000         2.90000        -4.80077
   0.00000      0.80000         6.00000         2.92500        -4.69095
   0.00000      0.80000         6.00000         2.95000        -4.58384
   0.00000      0.80000         6.00000         2.97500        -4.47932
   0.00000      0.80000         6.00000         3.00000        -4.37732
   0.00000      0.80000         6.00000         3.02500        -4.27775
   0.00000      0.80000         6.00000         3.05000        -4.18051
   0.00000      0.80000         6.00000         3.07500        -4.08554
   0.00000      0.80000         6.00000         3.10000        -3.99276
   0.00000      0.80000         6.00000         3.12500        -3.90208
   0.00000      0.80000         6.00000         3.15000        -3.81346
   0.00000      0.80000         6.00000         3.17500        -3.72680
   0.00000      0.80000         6.00000         3.20000        -3.64207
   0.00000      0.80000         6.00000         3.22500        -3.55918
   0.00000      0.80000         6.00000         3.25000        -3.47809
   0.00000      0.80000         6.00000         3.27500        -3.39873
   0.00000      0.80000         6.00000         3.30000        -3.32106
   0.00000      0.80000         6.00000         3.32500        -3.24502
   0.00000      0.80000         6.00000         3.35000        -3.17056
   0.00000      0.80000         6.00000         3.37500        -3.09764
   0.00000      0.80000         6.00000         3.40000        -3.02620
   0.00000      0.80000         6.00000         3.42500        -2.95621
   0.00000      0.80000         6.00000         3.45000        -2.88762
   0.00000      0.80000         6.00000         3.47500        -2.82040
   0.00000      0.80000         6.00000         3.50000        -2.75449
   0.00000      0.80000         6.00000         3.52500        -2.68988
   0.00000      0.80000         6.00000         3.55000        -2.62651
   0.00000      0.80000         6.00000         3.57500        -2.56435
   0.00000      0.80000         6.00000         3.60000        -2.50337
   0.00000      0.80000         6.00000         3.62500        -2.44355
   0.00000      0.80000         6.00000         3.65000        -2.38484
   0.00000      0.80000         6.00000         3.67500        -2.32721
   0.00000      0.80000         6.00000         3.70000        -2.27064
   0.00000      0.80000         6.00000         3.72500        -2.21511
   0.00000      0.80000         6.00000         3.75000        -2.16057
   0.00000      0.80000         6.00000         3.77500        -2.10701
   0.00000      0.80000         6.00000         3.80000        -2.05440
   0.00000      0.80000         6.00000         3.82500        -2.00272
   0.00000      0.80000         6.00000         3.85000        -1.95194
   0.00000      0.80000         6.00000         3.87500        -1.90204
   0.00000      0.80000         6.00000         3.90000        -1.85300
   0.00000      0.80000         6.00000         3.92500        -1.80480
   0.00000      0.80000         6.00000         3.95000        -1.75741
   0.00000      0.80000         6.00000         3.97500        -1.71082
   0.00000      0.80000         6.00000         4.00000        -1.66501
   0.00000      0.80000         6.00000         4.02500        -1.61995
   0.00000      0.80000         6.00000         4.05000        -1.57564
   0.00000      0.80000         6.00000         4.07500        -1.53204
   0.00000      0.80000         6.00000         4.10000        -1.48916
   0.00000      0.80000         6.00000         4.12500        -1.44696
   0.00000      0.80000         6.00000         4.15000        -1.40543
   0.00000      0.80000         6.00000         4.17500        -1.36456
   0.00000      0.80000         6.00000         4.20000        -1.32434
   0.00000      0.80000         6.00000         4.22500        -1.28474
   0.00000      0.80000         6.00000         4.25000        -1.24576
   0.00000      0.80000         6.00000         4.27500        -1.20738
   0.00000      0.80000         6.00000         4.30000        -1.16958
   0.00000      0.80000         6.00000         4.32500        -1.13236
   0.00000      0.80000         6.00000         4.35000        -1.09570
   0.00000      0.80000         6.00000         4.37500        -1.05959
   0.00000      0.80000         6.00000         4.40000        -1.02401
   0.00000      0.80000         6.00000         4.42500        -0.98897
   0.00000      0.80000         6.00000         4.45000        -0.95443
   0.00000      0.80000         6.00000         4.47500        -0.92040
   0.00000      0.80000         6.00000         4.50000        -0.88687
   0.00000      0.80000         6.00000         4.52500        -0.85381
   0.00000      0.80000         6.00000         4.55000        -0.82123
   0.00000      0.80000         6.00000         4.57500        -0.78912
   0.00000      0.80000         6.00000         4.60000        -0.75745
   0.00000      0.80000         6.00000         4.62500        -0.72624
   0.00000      0.80000         6.00000         4.65000        -0.69545
   0.00000      0.80000         6.00000         4.67500        -0.66510
   0.00000      0.80000         6.00000         4.70000        -0.63516
   0.00000      0.80000         6.00000         4.72500        -0.60563
   0.00000      0.80000         6.00000         4.75000        -0.57650
   0.00000      0.80000         6.00000         4.77500        -0.54777
   0.00000      0.80000         6.00000         4.80000        -0.51942
   0.00000      0.80000         6.00000         4.82500        -0.49146
   0.00000      0.80000         6.00000         4.85000        -0.46386
   0.00000      0.80000         6.00000         4.87500        -0.43663
   0.00000      0.80000         6.00000         4.90000        -0.40976
   0.00000      0.80000         6.00000         4.92500        -0.38324
   0.00000      0.80000         6.00000         4.95000        -0.35706
   0.00000      0.80000         6.00000         4.97500        -0.33122
   0.00000      0.80000         6.00000         5.00000        -0.30571
   0.00000      0.80000         6.00000         5.02500        -0.28053
   0.00000      0.80000         6.00000         5.05000        -0.25567
   0.00000      0.80000         6.00000         5.07500        -0.23112
   0.00000      0.80000         6.00000         5.10000        -0.20688
   0.00000      0.80000         6.00000         5.12500        -0.18294
   0.00000      0.80000         6.00000         5.15000        -0.15930
   0.00000      0.80000         6.00000         5.17500        -0.13595
   0.00000      0.80000         6.00000         5.20000        -0.11289
   0.00000      0.80000         6.00000         5.22500        -0.09011
   0.00000      0.80000         6.00000         5.25000        -0.06761
   0.00000      0.80000         6.00000         5.27500        -0.04537
   0.00000      0.80000         6.00000         5.30000        -0.02341
   0.00000      0.80000         6.00000         5.32500        -0.00171
   0.00000      0.80000         6.00000         5.35000         0.01973
   0.00000      0.80000         6.00000         5.37500         0.04092
   0.00000      0.80000         6.00000         5.40000         0.06186
   0.00000      0.80000         6.00000         5.42500         0.08256
   0.00000      0.80000         6.00000         5.45000         0.10301
   0.00000      0.80000         6.00000         5.47500         0.12323
   0.00000      0.80000         6.00000         5.50000         0.14321
   0.00000      0.80000         6.00000         5.52500         0.16297
   0.00000      0.80000         6.00000         5.55000         0.18249
   0.00000      0.80000         6.00000         5.57500         0.20180
   0.00000      0.80000         6.00000         5.60000         0.22089
   0.00000      0.80000         6.00000         5.62500         0.23976
   0.00000      0.80000         6.00000         5.65000         0.25842
   0.00000      0.80000         6.00000         5.67500         0.27688
   0.00000      0.80000         6.00000         5.70000         0.29513
   0.00000      0.80000         6.00000         5.72500         0.31317
   0.00000      0.80000         6.00000         5.75000         0.33102
   0.00000      0.80000         6.00000         5.77500         0.34868
   0.00000      0.80000         6.00000         5.80000         0.36614
   0.00000      0.80000         6.00000         5.82500         0.38341
   0.00000      0.80000         6.00000         5.85000         0.40050
   0.00000      0.80000         6.00000         5.87500         0.41740
   0.00000      0.80000         6.00000         5.90000         0.43412
   0.00000      0.80000         6.00000         5.92500         0.45066
   0.00000      0.80000         6.00000         5.95000         0.46703
   0.00000      0.80000         6.00000         5.97500         0.48323
   0.00000      0.80000         6.00000         6.00000         0.49926
   0.00000      0.80000         6.00000         6.02500         0.51512
   0.00000      0.80000         8.00000         0.67500     -6217.36356
   0.00000      0.80000         8.00000         0.70000     -4131.00290
   0.00000      0.80000         8.00000         0.72500     -2842.71099
   0.00000      0.80000         8.00000         0.75000     -2019.02134
   0.00000      0.80000         8.00000         0.77500     -1475.53851
   0.00000      0.80000         8.00000         0.80000     -1106.55277
   0.00000      0.80000         8.00000         0.82500      -849.44531
   0.00000      0.80000         8.00000         0.85000      -665.99906
   0.00000      0.80000         8.00000         0.87500      -532.24456
   0.00000      0.80000         8.00000         0.90000      -432.76748
   0.00000      0.80000         8.00000         0.92500      -357.42452
   0.00000      0.80000         8.00000         0.95000      -299.39792
   0.00000      0.80000         8.00000         0.97500      -254.01447
   0.00000      0.80000         8.00000         1.00000      -218.01233
   0.00000      0.80000         8.00000         1.02500      -189.07608
   0.00000      0.80000         8.00000         1.05000      -165.53622
   0.00000      0.80000         8.00000         1.07500      -146.17127
   0.00000      0.80000         8.00000         1.10000      -130.07530
   0.00000      0.80000         8.00000         1.12500      -116.56783
   0.00000      0.80000         8.00000         1.15000      -105.13160
   0.00000      0.80000         8.00000         1.17500       -95.36900
   0.00000      0.80000         8.00000         1.20000       -86.97119
   0.00000      0.80000         8.00000         1.22500       -79.69589
   0.00000      0.80000         8.00000         1.25000       -73.35129
   0.00000      0.80000         8.00000         1.27500       -67.78420
   0.00000      0.80000         8.00000         1.30000       -62.87126
   0.00000      0.80000         8.00000         1.32500       -58.51236
   0.00000      0.80000         8.00000         1.35000       -54.62567
   0.00000      0.80000         8.00000         1.37500       -51.14382
   0.00000      0.80000         8.00000         1.40000       -48.01099
   0.00000      0.80000         8.00000         1.42500       -45.18065
   0.00000      0.80000         8.00000         1.45000       -42.61376
   0.00000      0.80000         8.00000         1.47500       -40.27742
   0.00000      0.80000         8.00000         1.50000       -38.14371
   0.00000      0.80000         8.00000         1.52500       -36.18886
   0.00000      0.80000         8.00000         1.55000       -34.39250
   0.00000      0.80000         8.00000         1.57500       -32.73712
   0.00000      0.80000         8.00000         1.60000       -31.20760
   0.00000      0.80000         8.00000         1.62500       -29.79080
   0.00000      0.80000         8.00000         1.65000       -28.47530
   0.00000      0.80000         8.00000         1.67500       -27.25111
   0.00000      0.80000         8.00000         1.70000       -26.10947
   0.00000      0.80000         8.00000         1.72500       -25.04265
   0.00000      0.80000         8.00000         1.75000       -24.04385
   0.00000      0.80000         8.00000         1.77500       -23.10702
   0.00000      0.80000         8.00000         1.80000       -22.22680
   0.00000      0.80000         8.00000         1.82500       -21.39841
   0.00000      0.80000         8.00000         1.85000       -20.61757
   0.00000      0.80000         8.00000         1.87500       -19.88045
   0.00000      0.80000         8.00000         1.90000       -19.18362
   0.00000      0.80000         8.00000         1.92500       -18.52397
   0.00000      0.80000         8.00000         1.95000       -17.89872
   0.00000      0.80000         8.00000         1.97500       -17.30532
   0.00000      0.80000         8.00000         2.00000       -16.74149
   0.00000      0.80000         8.00000         2.02500       -16.20514
   0.00000      0.80000         8.00000         2.05000       -15.69438
   0.00000      0.80000         8.00000         2.07500       -15.20747
   0.00000      0.80000         8.00000         2.10000       -14.74284
   0.00000      0.80000         8.00000         2.12500       -14.29904
   0.00000      0.80000         8.00000         2.15000       -13.87474
   0.00000      0.80000         8.00000         2.17500       -13.46872
   0.00000      0.80000         8.00000         2.20000       -13.07986
   0.00000      0.80000         8.00000         2.22500       -12.70713
   0.00000      0.80000         8.00000         2.25000       -12.34958
   0.00000      0.80000         8.00000         2.27500       -12.00632
   0.00000      0.80000         8.00000         2.30000       -11.67653
   0.00000      0.80000         8.00000         2.32500       -11.35947
   0.00000      0.80000         8.00000         2.35000       -11.05443
   0.00000      0.80000         8.00000         2.37500       -10.76076
   0.00000      0.80000         8.00000         2.40000       -10.47785
   0.00000      0.80000         8.00000         2.42500       -10.20514
   0.00000      0.80000         8.00000         2.45000        -9.94211
   0.00000      0.80000         8.00000         2.47500        -9.68826
   0.00000      0.80000         8.00000         2.50000        -9.44312
   0.00000      0.80000         8.00000         2.52500        -9.20629
   0.00000      0.80000         8.00000         2.55000        -8.97734
   0.00000      0.80000         8.00000         2.57500        -8.75591
   0.00000      0.80000         8.00000         2.60000        -8.54164
   0.00000      0.80000         8.00000         2.62500        -8.33419
   0.00000      0.80000         8.00000         2.65000        -8.13326
   0.00000      0.80000         8.00000         2.67500        -7.93856
   0.00000      0.80000         8.00000         2.70000        -7.74980
   0.00000      0.80000         8.00000         2.72500        -7.56673
   0.00000      0.80000         8.00000         2.75000        -7.38909
   0.00000      0.80000         8.00000         2.77500        -7.21666
   0.00000      0.80000         8.00000         2.80000        -7.04922
   0.00000      0.80000         8.00000         2.82500        -6.88656
   0.00000      0.80000         8.00000         2.85000        -6.72849
   0.00000      0.80000         8.00000         2.87500        -6.57481
   0.00000      0.80000         8.00000         2.90000        -6.42536
   0.00000      0.80000         8.00000         2.92500        -6.27996
   0.00000      0.80000         8.00000         2.95000        -6.13846
   0.00000      0.80000         8.00000         2.97500        -6.00070
   0.00000      0.80000         8.00000         3.00000        -5.86656
   0.00000      0.80000         8.00000         3.02500        -5.73588
   0.00000      0.80000         8.00000         3.05000        -5.60854
   0.00000      0.80000         8.00000         3.07500        -5.48442
   0.00000      0.80000         8.00000         3.10000        -5.36340
   0.00000      0.80000         8.00000         3.12500        -5.24536
   0.00000      0.80000         8.00000         3.15000        -5.13022
   0.00000      0.80000         8.00000         3.17500        -5.01785
   0.00000      0.80000         8.00000         3.20000        -4.90817
   0.00000      0.80000         8.00000         3.22500        -4.80108
   0.00000      0.80000         8.00000         3.25000        -4.69649
   0.00000      0.80000         8.00000         3.27500        -4.59432
   0.00000      0.80000         8.00000         3.30000        -4.49450
   0.00000      0.80000         8.00000         3.32500        -4.39694
   0.00000      0.80000         8.00000         3.35000        -4.30156
   0.00000      0.80000         8.00000         3.37500        -4.20831
   0.00000      0.80000         8.00000         3.40000        -4.11710
   0.00000      0.80000         8.00000         3.42500        -4.02788
   0.00000      0.80000         8.00000         3.45000        -3.94058
   0.00000      0.80000         8.00000         3.47500        -3.85515
   0.00000      0.80000         8.00000         3.50000        -3.77152
   0.00000      0.80000         8.00000         3.52500        -3.68965
   0.00000      0.80000         8.00000         3.55000        -3.60947
   0.00000      0.80000         8.00000         3.57500        -3.53095
   0.00000      0.80000         8.00000         3.60000        -3.45402
   0.00000      0.80000         8.00000         3.62500        -3.37864
   0.00000      0.80000         8.00000         3.65000        -3.30477
   0.00000      0.80000         8.00000         3.67500        -3.23237
   0.00000      0.80000         8.00000         3.70000        -3.16139
   0.00000      0.80000         8.00000         3.72500        -3.09179
   0.00000      0.80000         8.00000         3.75000        -3.02353
   0.00000      0.80000         8.00000         3.77500        -2.95658
   0.00000      0.80000         8.00000         3.80000        -2.89090
   0.00000      0.80000         8.00000         3.82500        -2.82646
   0.00000      0.80000         8.00000         3.85000        -2.76322
   0.00000      0.80000         8.00000         3.87500        -2.70115
   0.00000      0.80000         8.00000         3.90000        -2.64021
   0.00000      0.80000         8.00000         3.92500        -2.58039
   0.00000      0.80000         8.00000         3.95000        -2.52165
   0.00000      0.80000         8.00000         3.97500        -2.46396
   0.00000      0.80000         8.00000         4.00000        -2.40729
   0.00000      0.80000         8.00000         4.02500        -2.35162
   0.00000      0.80000         8.00000         4.05000        -2.29692
   0.00000      0.80000         8.00000         4.07500        -2.24318
   0.00000      0.80000         8.00000         4.10000        -2.19036
   0.00000      0.80000         8.00000         4.12500        -2.13844
   0.00000      0.80000         8.00000         4.15000        -2.08740
   0.00000      0.80000         8.00000         4.17500        -2.03722
   0.00000      0.80000         8.00000         4.20000        -1.98788
   0.00000      0.80000         8.00000         4.22500        -1.93936
   0.00000      0.80000         8.00000         4.25000        -1.89163
   0.00000      0.80000         8.00000         4.27500        -1.84468
   0.00000      0.80000         8.00000         4.30000        -1.79850
   0.00000      0.80000         8.00000         4.32500        -1.75306
   0.00000      0.80000         8.00000         4.35000        -1.70835
   0.00000      0.80000         8.00000         4.37500        -1.66434
   0.00000      0.80000         8.00000         4.40000        -1.62103
   0.00000      0.80000         8.00000         4.42500        -1.57840
   0.00000      0.80000         8.00000         4.45000        -1.53643
   0.00000      0.80000         8.00000         4.47500        -1.49511
   0.00000      0.80000         8.00000         4.50000        -1.45442
   0.00000      0.80000         8.00000         4.52500        -1.41435
   0.00000      0.80000         8.00000         4.55000        -1.37489
   0.00000      0.80000         8.00000         4.57500        -1.33602
   0.00000      0.80000         8.00000         4.60000        -1.29773
   0.00000      0.80000         8.00000         4.62500        -1.26001
   0.00000      0.80000         8.00000         4.65000        -1.22285
   0.00000      0.80000         8.00000         4.67500        -1.18623
   0.00000      0.80000         8.00000         4.70000        -1.15014
   0.00000      0.80000         8.00000         4.72500        -1.11457
   0.00000      0.80000         8.00000         4.75000        -1.07952
   0.00000      0.80000         8.00000         4.77500        -1.04496
   0.00000      0.80000         8.00000         4.80000        -1.01090
   0.00000      0.80000         8.00000         4.82500        -0.97731
   0.00000      0.80000         8.00000         4.85000        -0.94420
   0.00000      0.80000         8.00000         4.87500        -0.91154
   0.00000      0.80000         8.00000         4.90000        -0.87934
   0.00000      0.80000         8.00000         4.92500        -0.84758
   0.00000      0.80000         8.00000         4.95000        -0.81625
   0.00000      0.80000         8.00000         4.97500        -0.78536
   0.00000      0.80000         8.00000         5.00000        -0.75487
   0.00000      0.80000         8.00000         5.02500        -0.72480
   0.00000      0.80000         8.00000         5.05000        -0.69513
   0.00000      0.80000         8.00000         5.07500        -0.66585
   0.00000      0.80000         8.00000         5.10000        -0.63696
   0.00000      0.80000         8.00000         5.12500        -0.60845
   0.00000      0.80000         8.00000         5.15000        -0.58031
   0.00000      0.80000         8.00000         5.17500        -0.55253
   0.00000      0.80000         8.00000         5.20000        -0.52512
   0.00000      0.80000         8.00000         5.22500        -0.49805
   0.00000      0.80000         8.00000         5.25000        -0.47133
   0.00000      0.80000         8.00000         5.27500        -0.44495
   0.00000      0.80000         8.00000         5.30000        -0.41890
   0.00000      0.80000         8.00000         5.32500        -0.39318
   0.00000      0.80000         8.00000         5.35000        -0.36778
   0.00000      0.80000         8.00000         5.37500        -0.34270
   0.00000      0.80000         8.00000         5.40000        -0.31792
   0.00000      0.80000         8.00000         5.42500        -0.29345
   0.00000      0.80000         8.00000         5.45000        -0.26928
   0.00000      0.80000         8.00000         5.47500        -0.24540
   0.00000      0.80000         8.00000         5.50000        -0.22181
   0.00000      0.80000         8.00000         5.52500        -0.19850
   0.00000      0.80000         8.00000         5.55000        -0.17548
   0.00000      0.80000         8.00000         5.57500        -0.15272
   0.00000      0.80000         8.00000         5.60000        -0.13024
   0.00000      0.80000         8.00000         5.62500        -0.10802
   0.00000      0.80000         8.00000         5.65000        -0.08606
   0.00000      0.80000         8.00000         5.67500        -0.06436
   0.00000      0.80000         8.00000         5.70000        -0.04291
   0.00000      0.80000         8.00000         5.72500        -0.02171
   0.00000      0.80000         8.00000         5.75000        -0.00075
   0.00000      0.80000         8.00000         5.77500         0.01997
   0.00000      0.80000         8.00000         5.80000         0.04046
   0.00000      0.80000         8.00000         5.82500         0.06071
   0.00000      0.80000         8.00000         5.85000         0.08073
   0.00000      0.80000         8.00000         5.87500         0.10053
   0.00000      0.80000         8.00000         5.90000         0.12011
   0.00000      0.80000         8.00000         5.92500         0.13947
   0.00000      0.80000         8.00000         5.95000         0.15862
   0.00000      0.80000         8.00000         5.97500         0.17756
   0.00000      0.80000         8.00000         6.00000         0.19629
   0.00000      0.80000         8.00000         6.02500         0.21481
   0.00000      0.80000        10.00000         0.67500    -52716.80835
   0.00000      0.80000        10.00000         0.70000    -31391.66093
   0.00000      0.80000        10.00000         0.72500    -19474.15598
   0.00000      0.80000        10.00000         0.75000    -12536.28591
   0.00000      0.80000        10.00000         0.77500     -8345.49171
   0.00000      0.80000        10.00000         0.80000     -5727.91946
   0.00000      0.80000        10.00000         0.82500     -4042.44636
   0.00000      0.80000        10.00000         0.85000     -2926.58199
   0.00000      0.80000        10.00000         0.87500     -2168.79633
   0.00000      0.80000        10.00000         0.90000     -1642.02833
   0.00000      0.80000        10.00000         0.92500     -1267.90013
   0.00000      0.80000        10.00000         0.95000      -996.86633
   0.00000      0.80000        10.00000         0.97500      -796.89178
   0.00000      0.80000        10.00000         1.00000      -646.82537
   0.00000      0.80000        10.00000         1.02500      -532.42855
   0.00000      0.80000        10.00000         1.05000      -443.94177
   0.00000      0.80000        10.00000         1.07500      -374.56222
   0.00000      0.80000        10.00000         1.10000      -319.47312
   0.00000      0.80000        10.00000         1.12500      -275.21361
   0.00000      0.80000        10.00000         1.15000      -239.26267
   0.00000      0.80000        10.00000         1.17500      -209.76016
   0.00000      0.80000        10.00000         1.20000      -185.31684
   0.00000      0.80000        10.00000         1.22500      -164.88336
   0.00000      0.80000        10.00000         1.25000      -147.65851
   0.00000      0.80000        10.00000         1.27500      -133.02441
   0.00000      0.80000        10.00000         1.30000      -120.49994
   0.00000      0.80000        10.00000         1.32500      -109.70713
   0.00000      0.80000        10.00000         1.35000      -100.34648
   0.00000      0.80000        10.00000         1.37500       -92.17875
   0.00000      0.80000        10.00000         1.40000       -85.01139
   0.00000      0.80000        10.00000         1.42500       -78.68828
   0.00000      0.80000        10.00000         1.45000       -73.08199
   0.00000      0.80000        10.00000         1.47500       -68.08777
   0.00000      0.80000        10.00000         1.50000       -63.61906
   0.00000      0.80000        10.00000         1.52500       -59.60383
   0.00000      0.80000        10.00000         1.55000       -55.98185
   0.00000      0.80000        10.00000         1.57500       -52.70246
   0.00000      0.80000        10.00000         1.60000       -49.72284
   0.00000      0.80000        10.00000         1.62500       -47.00665
   0.00000      0.80000        10.00000         1.65000       -44.52283
   0.00000      0.80000        10.00000         1.67500       -42.24480
   0.00000      0.80000        10.00000         1.70000       -40.14965
   0.00000      0.80000        10.00000         1.72500       -38.21759
   0.00000      0.80000        10.00000         1.75000       -36.43146
   0.00000      0.80000        10.00000         1.77500       -34.77630
   0.00000      0.80000        10.00000         1.80000       -33.23904
   0.00000      0.80000        10.00000         1.82500       -31.80821
   0.00000      0.80000        10.00000         1.85000       -30.47373
   0.00000      0.80000        10.00000         1.87500       -29.22669
   0.00000      0.80000        10.00000         1.90000       -28.05921
   0.00000      0.80000        10.00000         1.92500       -26.96428
   0.00000      0.80000        10.00000         1.95000       -25.93568
   0.00000      0.80000        10.00000         1.97500       -24.96784
   0.00000      0.80000        10.00000         2.00000       -24.05578
   0.00000      0.80000        10.00000         2.02500       -23.19502
   0.00000      0.80000        10.00000         2.05000       -22.38155
   0.00000      0.80000        10.00000         2.07500       -21.61175
   0.00000      0.80000        10.00000         2.10000       -20.88233
   0.00000      0.80000        10.00000         2.12500       -20.19034
   0.00000      0.80000        10.00000         2.15000       -19.53307
   0.00000      0.80000        10.00000         2.17500       -18.90809
   0.00000      0.80000        10.00000         2.20000       -18.31317
   0.00000      0.80000        10.00000         2.22500       -17.74627
   0.00000      0.80000        10.00000         2.25000       -17.20553
   0.00000      0.80000        10.00000         2.27500       -16.68925
   0.00000      0.80000        10.00000         2.30000       -16.19588
   0.00000      0.80000        10.00000         2.32500       -15.72397
   0.00000      0.80000        10.00000         2.35000       -15.27220
   0.00000      0.80000        10.00000         2.37500       -14.83937
   0.00000      0.80000        10.00000         2.40000       -14.42433
   0.00000      0.80000        10.00000         2.42500       -14.02607
   0.00000      0.80000        10.00000         2.45000       -13.64361
   0.00000      0.80000        10.00000         2.47500       -13.27607
   0.00000      0.80000        10.00000         2.50000       -12.92262
   0.00000      0.80000        10.00000         2.52500       -12.58250
   0.00000      0.80000        10.00000         2.55000       -12.25498
   0.00000      0.80000        10.00000         2.57500       -11.93941
   0.00000      0.80000        10.00000         2.60000       -11.63516
   0.00000      0.80000        10.00000         2.62500       -11.34167
   0.00000      0.80000        10.00000         2.65000       -11.05837
   0.00000      0.80000        10.00000         2.67500       -10.78478
   0.00000      0.80000        10.00000         2.70000       -10.52042
   0.00000      0.80000        10.00000         2.72500       -10.26484
   0.00000      0.80000        10.00000         2.75000       -10.01762
   0.00000      0.80000        10.00000         2.77500        -9.77839
   0.00000      0.80000        10.00000         2.80000        -9.54676
   0.00000      0.80000        10.00000         2.82500        -9.32240
   0.00000      0.80000        10.00000         2.85000        -9.10497
   0.00000      0.80000        10.00000         2.87500        -8.89418
   0.00000      0.80000        10.00000         2.90000        -8.68974
   0.00000      0.80000        10.00000         2.92500        -8.49136
   0.00000      0.80000        10.00000         2.95000        -8.29880
   0.00000      0.80000        10.00000         2.97500        -8.11181
   0.00000      0.80000        10.00000         3.00000        -7.93016
   0.00000      0.80000        10.00000         3.02500        -7.75363
   0.00000      0.80000        10.00000         3.05000        -7.58201
   0.00000      0.80000        10.00000         3.07500        -7.41512
   0.00000      0.80000        10.00000         3.10000        -7.25276
   0.00000      0.80000        10.00000         3.12500        -7.09476
   0.00000      0.80000        10.00000         3.15000        -6.94094
   0.00000      0.80000        10.00000         3.17500        -6.79116
   0.00000      0.80000        10.00000         3.20000        -6.64527
   0.00000      0.80000        10.00000         3.22500        -6.50310
   0.00000      0.80000        10.00000         3.25000        -6.36454
   0.00000      0.80000        10.00000         3.27500        -6.22945
   0.00000      0.80000        10.00000         3.30000        -6.09770
   0.00000      0.80000        10.00000         3.32500        -5.96918
   0.00000      0.80000        10.00000         3.35000        -5.84377
   0.00000      0.80000        10.00000         3.37500        -5.72137
   0.00000      0.80000        10.00000         3.40000        -5.60187
   0.00000      0.80000        10.00000         3.42500        -5.48518
   0.00000      0.80000        10.00000         3.45000        -5.37119
   0.00000      0.80000        10.00000         3.47500        -5.25983
   0.00000      0.80000        10.00000         3.50000        -5.15100
   0.00000      0.80000        10.00000         3.52500        -5.04462
   0.00000      0.80000        10.00000         3.55000        -4.94061
   0.00000      0.80000        10.00000         3.57500        -4.83890
   0.00000      0.80000        10.00000         3.60000        -4.73941
   0.00000      0.80000        10.00000         3.62500        -4.64208
   0.00000      0.80000        10.00000         3.65000        -4.54683
   0.00000      0.80000        10.00000         3.67500        -4.45361
   0.00000      0.80000        10.00000         3.70000        -4.36235
   0.00000      0.80000        10.00000         3.72500        -4.27300
   0.00000      0.80000        10.00000         3.75000        -4.18549
   0.00000      0.80000        10.00000         3.77500        -4.09977
   0.00000      0.80000        10.00000         3.80000        -4.01579
   0.00000      0.80000        10.00000         3.82500        -3.93350
   0.00000      0.80000        10.00000         3.85000        -3.85285
   0.00000      0.80000        10.00000         3.87500        -3.77379
   0.00000      0.80000        10.00000         3.90000        -3.69628
   0.00000      0.80000        10.00000         3.92500        -3.62028
   0.00000      0.80000        10.00000         3.95000        -3.54574
   0.00000      0.80000        10.00000         3.97500        -3.47262
   0.00000      0.80000        10.00000         4.00000        -3.40089
   0.00000      0.80000        10.00000         4.02500        -3.33050
   0.00000      0.80000        10.00000         4.05000        -3.26142
   0.00000      0.80000        10.00000         4.07500        -3.19362
   0.00000      0.80000        10.00000         4.10000        -3.12706
   0.00000      0.80000        10.00000         4.12500        -3.06171
   0.00000      0.80000        10.00000         4.15000        -2.99754
   0.00000      0.80000        10.00000         4.17500        -2.93451
   0.00000      0.80000        10.00000         4.20000        -2.87261
   0.00000      0.80000        10.00000         4.22500        -2.81179
   0.00000      0.80000        10.00000         4.25000        -2.75204
   0.00000      0.80000        10.00000         4.27500        -2.69332
   0.00000      0.80000        10.00000         4.30000        -2.63561
   0.00000      0.80000        10.00000         4.32500        -2.57889
   0.00000      0.80000        10.00000         4.35000        -2.52313
   0.00000      0.80000        10.00000         4.37500        -2.46831
   0.00000      0.80000        10.00000         4.40000        -2.41440
   0.00000      0.80000        10.00000         4.42500        -2.36139
   0.00000      0.80000        10.00000         4.45000        -2.30925
   0.00000      0.80000        10.00000         4.47500        -2.25796
   0.00000      0.80000        10.00000         4.50000        -2.20750
   0.00000      0.80000        10.00000         4.52500        -2.15786
   0.00000      0.80000        10.00000         4.55000        -2.10901
   0.00000      0.80000        10.00000         4.57500        -2.06094
   0.00000      0.80000        10.00000         4.60000        -2.01362
   0.00000      0.80000        10.00000         4.62500        -1.96705
   0.00000      0.80000        10.00000         4.65000        -1.92120
   0.00000      0.80000        10.00000         4.67500        -1.87606
   0.00000      0.80000        10.00000         4.70000        -1.83162
   0.00000      0.80000        10.00000         4.72500        -1.78785
   0.00000      0.80000        10.00000         4.75000        -1.74474
   0.00000      0.80000        10.00000         4.77500        -1.70229
   0.00000      0.80000        10.00000         4.80000        -1.66046
   0.00000      0.80000        10.00000         4.82500        -1.61926
   0.00000      0.80000        10.00000         4.85000        -1.57867
   0.00000      0.80000        10.00000         4.87500        -1.53868
   0.00000      0.80000        10.00000         4.90000        -1.49926
   0.00000      0.80000        10.00000         4.92500        -1.46042
   0.00000      0.80000        10.00000         4.95000        -1.42214
   0.00000      0.80000        10.00000         4.97500        -1.38440
   0.00000      0.80000        10.00000         5.00000        -1.34720
   0.00000      0.80000        10.00000         5.02500        -1.31053
   0.00000      0.80000        10.00000         5.05000        -1.27437
   0.00000      0.80000        10.00000         5.07500        -1.23872
   0.00000      0.80000        10.00000         5.10000        -1.20356
   0.00000      0.80000        10.00000         5.12500        -1.16888
   0.00000      0.80000        10.00000         5.15000        -1.13469
   0.00000      0.80000        10.00000         5.17500        -1.10095
   0.00000      0.80000        10.00000         5.20000        -1.06768
   0.00000      0.80000        10.00000         5.22500        -1.03485
   0.00000      0.80000        10.00000         5.25000        -1.00246
   0.00000      0.80000        10.00000         5.27500        -0.97051
   0.00000      0.80000        10.00000         5.30000        -0.93897
   0.00000      0.80000        10.00000         5.32500        -0.90786
   0.00000      0.80000        10.00000         5.35000        -0.87715
   0.00000      0.80000        10.00000         5.37500        -0.84683
   0.00000      0.80000        10.00000         5.40000        -0.81692
   0.00000      0.80000        10.00000         5.42500        -0.78738
   0.00000      0.80000        10.00000         5.45000        -0.75823
   0.00000      0.80000        10.00000         5.47500        -0.72944
   0.00000      0.80000        10.00000         5.50000        -0.70103
   0.00000      0.80000        10.00000         5.52500        -0.67296
   0.00000      0.80000        10.00000         5.55000        -0.64525
   0.00000      0.80000        10.00000         5.57500        -0.61789
   0.00000      0.80000        10.00000         5.60000        -0.59087
   0.00000      0.80000        10.00000         5.62500        -0.56417
   0.00000      0.80000        10.00000         5.65000        -0.53781
   0.00000      0.80000        10.00000         5.67500        -0.51177
   0.00000      0.80000        10.00000         5.70000        -0.48604
   0.00000      0.80000        10.00000         5.72500        -0.46062
   0.00000      0.80000        10.00000         5.75000        -0.43551
   0.00000      0.80000        10.00000         5.77500        -0.41070
   0.00000      0.80000        10.00000         5.80000        -0.38619
   0.00000      0.80000        10.00000         5.82500        -0.36196
   0.00000      0.80000        10.00000         5.85000        -0.33802
   0.00000      0.80000        10.00000         5.87500        -0.31436
   0.00000      0.80000        10.00000         5.90000        -0.29098
   0.00000      0.80000        10.00000         5.92500        -0.26787
   0.00000      0.80000        10.00000         5.95000        -0.24502
   0.00000      0.80000        10.00000         5.97500        -0.22244
   0.00000      0.80000        10.00000         6.00000        -0.20012
   0.00000      0.80000        10.00000         6.02500        -0.17804
   0.00000      0.80000        10.00000         6.05000        -0.15622
   0.00000      0.80000        10.00000         6.07500        -0.13465
   0.00000      0.80000        10.00000         6.10000        -0.11332
   0.00000      0.80000        10.00000         6.12500        -0.09222
   0.00000      0.80000        10.00000         6.15000        -0.07136
   0.00000      0.80000        10.00000         6.17500        -0.05073
   0.00000      0.80000        10.00000         6.20000        -0.03033
   0.00000      0.80000        10.00000         6.22500        -0.01015
   0.00000      0.80000        10.00000         6.25000         0.00981
   0.00000      0.80000        10.00000         6.27500         0.02955
   0.00000      0.80000        10.00000         6.30000         0.04908
   0.00000      0.70000         0.00000         0.50000      -273.84675
   0.00000      0.70000         0.00000         0.52500      -220.06998
   0.00000      0.70000         0.00000         0.55000      -181.10857
   0.00000      0.70000         0.00000         0.57500      -152.04669
   0.00000      0.70000         0.00000         0.60000      -129.81675
   0.00000      0.70000         0.00000         0.62500      -112.43673
   0.00000      0.70000         0.00000         0.65000       -98.58619
   0.00000      0.70000         0.00000         0.67500       -87.36125
   0.00000      0.70000         0.00000         0.70000       -78.12803
   0.00000      0.70000         0.00000         0.72500       -70.43230
   0.00000      0.70000         0.00000         0.75000       -63.94214
   0.00000      0.70000         0.00000         0.77500       -58.41072
   0.00000      0.70000         0.00000         0.80000       -53.65156
   0.00000      0.70000         0.00000         0.82500       -49.52166
   0.00000      0.70000         0.00000         0.85000       -45.90999
   0.00000      0.70000         0.00000         0.87500       -42.72921
   0.00000      0.70000         0.00000         0.90000       -39.90988
   0.00000      0.70000         0.00000         0.92500       -37.39624
   0.00000      0.70000         0.00000         0.95000       -35.14306
   0.00000      0.70000         0.00000         0.97500       -33.11334
   0.00000      0.70000         0.00000         1.00000       -31.27658
   0.00000      0.70000         0.00000         1.02500       -29.60742
   0.00000      0.70000         0.00000         1.05000       -28.08463
   0.00000      0.70000         0.00000         1.07500       -26.69036
   0.00000      0.70000         0.00000         1.10000       -25.40944
   0.00000      0.70000         0.00000         1.12500       -24.22898
   0.00000      0.70000         0.00000         1.15000       -23.13789
   0.00000      0.70000         0.00000         1.17500       -22.12665
   0.00000      0.70000         0.00000         1.20000       -21.18700
   0.00000      0.70000         0.00000         1.22500       -20.31177
   0.00000      0.70000         0.00000         1.25000       -19.49470
   0.00000      0.70000         0.00000         1.27500       -18.73029
   0.00000      0.70000         0.00000         1.30000       -18.01371
   0.00000      0.70000         0.00000         1.32500       -17.34068
   0.00000      0.70000         0.00000         1.35000       -16.70743
   0.00000      0.70000         0.00000         1.37500       -16.11060
   0.00000      0.70000         0.00000         1.40000       -15.54717
   0.00000      0.70000         0.00000         1.42500       -15.01447
   0.00000      0.70000         0.00000         1.45000       -14.51008
   0.00000      0.70000         0.00000         1.47500       -14.03185
   0.00000      0.70000         0.00000         1.50000       -13.57781
   0.00000      0.70000         0.00000         1.52500       -13.14621
   0.00000      0.70000         0.00000         1.55000       -12.73544
   0.00000      0.70000         0.00000         1.57500       -12.34405
   0.00000      0.70000         0.00000         1.60000       -11.97072
   0.00000      0.70000         0.00000         1.62500       -11.61424
   0.00000      0.70000         0.00000         1.65000       -11.27351
   0.00000      0.70000         0.00000         1.67500       -10.94753
   0.00000      0.70000         0.00000         1.70000       -10.63536
   0.00000      0.70000         0.00000         1.72500       -10.33615
   0.00000      0.70000         0.00000         1.75000       -10.04914
   0.00000      0.70000         0.00000         1.77500        -9.77358
   0.00000      0.70000         0.00000         1.80000        -9.50882
   0.00000      0.70000         0.00000         1.82500        -9.25425
   0.00000      0.70000         0.00000         1.85000        -9.00929
   0.00000      0.70000         0.00000         1.87500        -8.77341
   0.00000      0.70000         0.00000         1.90000        -8.54613
   0.00000      0.70000         0.00000         1.92500        -8.32699
   0.00000      0.70000         0.00000         1.95000        -8.11556
   0.00000      0.70000         0.00000         1.97500        -7.91144
   0.00000      0.70000         0.00000         2.00000        -7.71428
   0.00000      0.70000         0.00000         2.02500        -7.52372
   0.00000      0.70000         0.00000         2.05000        -7.33943
   0.00000      0.70000         0.00000         2.07500        -7.16113
   0.00000      0.70000         0.00000         2.10000        -6.98852
   0.00000      0.70000         0.00000         2.12500        -6.82134
   0.00000      0.70000         0.00000         2.15000        -6.65935
   0.00000      0.70000         0.00000         2.17500        -6.50229
   0.00000      0.70000         0.00000         2.20000        -6.34997
   0.00000      0.70000         0.00000         2.22500        -6.20216
   0.00000      0.70000         0.00000         2.25000        -6.05867
   0.00000      0.70000         0.00000         2.27500        -5.91932
   0.00000      0.70000         0.00000         2.30000        -5.78394
   0.00000      0.70000         0.00000         2.32500        -5.65235
   0.00000      0.70000         0.00000         2.35000        -5.52440
   0.00000      0.70000         0.00000         2.37500        -5.39995
   0.00000      0.70000         0.00000         2.40000        -5.27885
   0.00000      0.70000         0.00000         2.42500        -5.16098
   0.00000      0.70000         0.00000         2.45000        -5.04621
   0.00000      0.70000         0.00000         2.47500        -4.93441
   0.00000      0.70000         0.00000         2.50000        -4.82548
   0.00000      0.70000         0.00000         2.52500        -4.71931
   0.00000      0.70000         0.00000         2.55000        -4.61580
   0.00000      0.70000         0.00000         2.57500        -4.51484
   0.00000      0.70000         0.00000         2.60000        -4.41635
   0.00000      0.70000         0.00000         2.62500        -4.32024
   0.00000      0.70000         0.00000         2.65000        -4.22642
   0.00000      0.70000         0.00000         2.67500        -4.13482
   0.00000      0.70000         0.00000         2.70000        -4.04536
   0.00000      0.70000         0.00000         2.72500        -3.95796
   0.00000      0.70000         0.00000         2.75000        -3.87255
   0.00000      0.70000         0.00000         2.77500        -3.78908
   0.00000      0.70000         0.00000         2.80000        -3.70747
   0.00000      0.70000         0.00000         2.82500        -3.62766
   0.00000      0.70000         0.00000         2.85000        -3.54960
   0.00000      0.70000         0.00000         2.87500        -3.47323
   0.00000      0.70000         0.00000         2.90000        -3.39850
   0.00000      0.70000         0.00000         2.92500        -3.32535
   0.00000      0.70000         0.00000         2.95000        -3.25374
   0.00000      0.70000         0.00000         2.97500        -3.18362
   0.00000      0.70000         0.00000         3.00000        -3.11494
   0.00000      0.70000         0.00000         3.02500        -3.04766
   0.00000      0.70000         0.00000         3.05000        -2.98174
   0.00000      0.70000         0.00000         3.07500        -2.91714
   0.00000      0.70000         0.00000         3.10000        -2.85382
   0.00000      0.70000         0.00000         3.12500        -2.79175
   0.00000      0.70000         0.00000         3.15000        -2.73088
   0.00000      0.70000         0.00000         3.17500        -2.67118
   0.00000      0.70000         0.00000         3.20000        -2.61262
   0.00000      0.70000         0.00000         3.22500        -2.55518
   0.00000      0.70000         0.00000         3.25000        -2.49881
   0.00000      0.70000         0.00000         3.27500        -2.44348
   0.00000      0.70000         0.00000         3.30000        -2.38918
   0.00000      0.70000         0.00000         3.32500        -2.33587
   0.00000      0.70000         0.00000         3.35000        -2.28353
   0.00000      0.70000         0.00000         3.37500        -2.23213
   0.00000      0.70000         0.00000         3.40000        -2.18164
   0.00000      0.70000         0.00000         3.42500        -2.13205
   0.00000      0.70000         0.00000         3.45000        -2.08332
   0.00000      0.70000         0.00000         3.47500        -2.03544
   0.00000      0.70000         0.00000         3.50000        -1.98839
   0.00000      0.70000         0.00000         3.52500        -1.94214
   0.00000      0.70000         0.00000         3.55000        -1.89667
   0.00000      0.70000         0.00000         3.57500        -1.85198
   0.00000      0.70000         0.00000         3.60000        -1.80802
   0.00000      0.70000         0.00000         3.62500        -1.76480
   0.00000      0.70000         0.00000         3.65000        -1.72229
   0.00000      0.70000         0.00000         3.67500        -1.68047
   0.00000      0.70000         0.00000         3.70000        -1.63933
   0.00000      0.70000         0.00000         3.72500        -1.59884
   0.00000      0.70000         0.00000         3.75000        -1.55901
   0.00000      0.70000         0.00000         3.77500        -1.51981
   0.00000      0.70000         0.00000         3.80000        -1.48122
   0.00000      0.70000         0.00000         3.82500        -1.44323
   0.00000      0.70000         0.00000         3.85000        -1.40584
   0.00000      0.70000         0.00000         3.87500        -1.36902
   0.00000      0.70000         0.00000         3.90000        -1.33276
   0.00000      0.70000         0.00000         3.92500        -1.29705
   0.00000      0.70000         0.00000         3.95000        -1.26188
   0.00000      0.70000         0.00000         3.97500        -1.22723
   0.00000      0.70000         0.00000         4.00000        -1.19310
   0.00000      0.70000         0.00000         4.02500        -1.15948
   0.00000      0.70000         0.00000         4.05000        -1.12634
   0.00000      0.70000         0.00000         4.07500        -1.09369
   0.00000      0.70000         0.00000         4.10000        -1.06151
   0.00000      0.70000         0.00000         4.12500        -1.02979
   0.00000      0.70000         0.00000         4.15000        -0.99853
   0.00000      0.70000         0.00000         4.17500        -0.96771
   0.00000      0.70000         0.00000         4.20000        -0.93732
   0.00000      0.70000         0.00000         4.22500        -0.90736
   0.00000      0.70000         0.00000         4.25000        -0.87781
   0.00000      0.70000         0.00000         4.27500        -0.84868
   0.00000      0.70000         0.00000         4.30000        -0.81994
   0.00000      0.70000         0.00000         4.32500        -0.79160
   0.00000      0.70000         0.00000         4.35000        -0.76364
   0.00000      0.70000         0.00000         4.37500        -0.73605
   0.00000      0.70000         0.00000         4.40000        -0.70884
   0.00000      0.70000         0.00000         4.42500        -0.68199
   0.00000      0.70000         0.00000         4.45000        -0.65549
   0.00000      0.70000         0.00000         4.47500        -0.62934
   0.00000      0.70000         0.00000         4.50000        -0.60354
   0.00000      0.70000         0.00000         4.52500        -0.57806
   0.00000      0.70000         0.00000         4.55000        -0.55292
   0.00000      0.70000         0.00000         4.57500        -0.52810
   0.00000      0.70000         0.00000         4.60000        -0.50360
   0.00000      0.70000         0.00000         4.62500        -0.47941
   0.00000      0.70000         0.00000         4.65000        -0.45553
   0.00000      0.70000         0.00000         4.67500        -0.43194
   0.00000      0.70000         0.00000         4.70000        -0.40865
   0.00000      0.70000         0.00000         4.72500        -0.38565
   0.00000      0.70000         0.00000         4.75000        -0.36293
   0.00000      0.70000         0.00000         4.77500        -0.34049
   0.00000      0.70000         0.00000         4.80000        -0.31833
   0.00000      0.70000         0.00000         4.82500        -0.29643
   0.00000      0.70000         0.00000         4.85000        -0.27480
   0.00000      0.70000         0.00000         4.87500        -0.25343
   0.00000      0.70000         0.00000         4.90000        -0.23231
   0.00000      0.70000         0.00000         4.92500        -0.21144
   0.00000      0.70000         0.00000         4.95000        -0.19083
   0.00000      0.70000         0.00000         4.97500        -0.17045
   0.00000      0.70000         0.00000         5.00000        -0.15031
   0.00000      0.70000         0.00000         5.02500        -0.13041
   0.00000      0.70000         0.00000         5.05000        -0.11073
   0.00000      0.70000         0.00000         5.07500        -0.09128
   0.00000      0.70000         0.00000         5.10000        -0.07206
   0.00000      0.70000         0.00000         5.12500        -0.05305
   0.00000      0.70000         0.00000         5.15000        -0.03426
   0.00000      0.70000         0.00000         5.17500        -0.01569
   0.00000      0.70000         0.00000         5.20000         0.00268
   0.00000      0.70000         0.00000         5.22500         0.02085
   0.00000      0.70000         0.00000         5.25000         0.03881
   0.00000      0.70000         0.00000         5.27500         0.05657
   0.00000      0.70000         0.00000         5.30000         0.07414
   0.00000      0.70000         0.00000         5.32500         0.09152
   0.00000      0.70000         0.00000         5.35000         0.10870
   0.00000      0.70000         0.00000         5.37500         0.12570
   0.00000      0.70000         0.00000         5.40000         0.14252
   0.00000      0.70000         0.00000         5.42500         0.15915
   0.00000      0.70000         0.00000         5.45000         0.17561
   0.00000      0.70000         0.00000         5.47500         0.19190
   0.00000      0.70000         0.00000         5.50000         0.20801
   0.00000      0.70000         0.00000         5.52500         0.22395
   0.00000      0.70000         0.00000         5.55000         0.23972
   0.00000      0.70000         0.00000         5.57500         0.25533
   0.00000      0.70000         0.00000         5.60000         0.27077
   0.00000      0.70000         0.00000         5.62500         0.28606
   0.00000      0.70000         0.00000         5.65000         0.30119
   0.00000      0.70000         0.00000         5.67500         0.31616
   0.00000      0.70000         0.00000         5.70000         0.33098
   0.00000      0.70000         0.00000         5.72500         0.34565
   0.00000      0.70000         0.00000         5.75000         0.36017
   0.00000      0.70000         0.00000         5.77500         0.37455
   0.00000      0.70000         0.00000         5.80000         0.38878
   0.00000      0.70000         0.00000         5.82500         0.40287
   0.00000      0.70000         0.00000         5.85000         0.41681
   0.00000      0.70000         0.00000         5.87500         0.43062
   0.00000      0.70000         0.00000         5.90000         0.44430
   0.00000      0.70000         0.00000         5.92500         0.45784
   0.00000      0.70000         0.00000         5.95000         0.47124
   0.00000      0.70000         0.00000         5.97500         0.48452
   0.00000      0.70000         0.00000         6.00000         0.49767
   0.00000      0.70000         0.00000         6.02500         0.51069
   0.00000      0.70000         0.00000         6.05000         0.52358
   0.00000      0.70000         0.00000         6.07500         0.53636
   0.00000      0.70000         0.00000         6.10000         0.54901
   0.00000      0.70000         0.00000         6.12500         0.56154
   0.00000      0.70000         0.00000         6.15000         0.57395
   0.00000      0.70000         0.00000         6.17500         0.58624
   0.00000      0.70000         1.00000         0.50000      -326.31930
   0.00000      0.70000         1.00000         0.52500      -256.97318
   0.00000      0.70000         1.00000         0.55000      -207.92862
   0.00000      0.70000         1.00000         0.57500      -172.09962
   0.00000      0.70000         1.00000         0.60000      -145.18426
   0.00000      0.70000         1.00000         0.62500      -124.47000
   0.00000      0.70000         1.00000         0.65000      -108.18854
   0.00000      0.70000         1.00000         0.67500       -95.15270
   0.00000      0.70000         1.00000         0.70000       -84.54429
   0.00000      0.70000         1.00000         0.72500       -75.78607
   0.00000      0.70000         1.00000         0.75000       -68.46221
   0.00000      0.70000         1.00000         0.77500       -62.26738
   0.00000      0.70000         1.00000         0.80000       -56.97357
   0.00000      0.70000         1.00000         0.82500       -52.40780
   0.00000      0.70000         1.00000         0.85000       -48.43700
   0.00000      0.70000         1.00000         0.87500       -44.95747
   0.00000      0.70000         1.00000         0.90000       -41.88743
   0.00000      0.70000         1.00000         0.92500       -39.16165
   0.00000      0.70000         1.00000         0.95000       -36.72763
   0.00000      0.70000         1.00000         0.97500       -34.54268
   0.00000      0.70000         1.00000         1.00000       -32.57182
   0.00000      0.70000         1.00000         1.02500       -30.78610
   0.00000      0.70000         1.00000         1.05000       -29.16147
   0.00000      0.70000         1.00000         1.07500       -27.67772
   0.00000      0.70000         1.00000         1.10000       -26.31784
   0.00000      0.70000         1.00000         1.12500       -25.06735
   0.00000      0.70000         1.00000         1.15000       -23.91392
   0.00000      0.70000         1.00000         1.17500       -22.84694
   0.00000      0.70000         1.00000         1.20000       -21.85729
   0.00000      0.70000         1.00000         1.22500       -20.93704
   0.00000      0.70000         1.00000         1.25000       -20.07929
   0.00000      0.70000         1.00000         1.27500       -19.27802
   0.00000      0.70000         1.00000         1.30000       -18.52794
   0.00000      0.70000         1.00000         1.32500       -17.82438
   0.00000      0.70000         1.00000         1.35000       -17.16323
   0.00000      0.70000         1.00000         1.37500       -16.54083
   0.00000      0.70000         1.00000         1.40000       -15.95393
   0.00000      0.70000         1.00000         1.42500       -15.39963
   0.00000      0.70000         1.00000         1.45000       -14.87532
   0.00000      0.70000         1.00000         1.47500       -14.37867
   0.00000      0.70000         1.00000         1.50000       -13.90758
   0.00000      0.70000         1.00000         1.52500       -13.46015
   0.00000      0.70000         1.00000         1.55000       -13.03468
   0.00000      0.70000         1.00000         1.57500       -12.62960
   0.00000      0.70000         1.00000         1.60000       -12.24350
   0.00000      0.70000         1.00000         1.62500       -11.87510
   0.00000      0.70000         1.00000         1.65000       -11.52321
   0.00000      0.70000         1.00000         1.67500       -11.18678
   0.00000      0.70000         1.00000         1.70000       -10.86481
   0.00000      0.70000         1.00000         1.72500       -10.55640
   0.00000      0.70000         1.00000         1.75000       -10.26072
   0.00000      0.70000         1.00000         1.77500        -9.97702
   0.00000      0.70000         1.00000         1.80000        -9.70458
   0.00000      0.70000         1.00000         1.82500        -9.44275
   0.00000      0.70000         1.00000         1.85000        -9.19094
   0.00000      0.70000         1.00000         1.87500        -8.94858
   0.00000      0.70000         1.00000         1.90000        -8.71516
   0.00000      0.70000         1.00000         1.92500        -8.49021
   0.00000      0.70000         1.00000         1.95000        -8.27326
   0.00000      0.70000         1.00000         1.97500        -8.06391
   0.00000      0.70000         1.00000         2.00000        -7.86176
   0.00000      0.70000         1.00000         2.02500        -7.66647
   0.00000      0.70000         1.00000         2.05000        -7.47768
   0.00000      0.70000         1.00000         2.07500        -7.29508
   0.00000      0.70000         1.00000         2.10000        -7.11838
   0.00000      0.70000         1.00000         2.12500        -6.94730
   0.00000      0.70000         1.00000         2.15000        -6.78157
   0.00000      0.70000         1.00000         2.17500        -6.62096
   0.00000      0.70000         1.00000         2.20000        -6.46522
   0.00000      0.70000         1.00000         2.22500        -6.31416
   0.00000      0.70000         1.00000         2.25000        -6.16755
   0.00000      0.70000         1.00000         2.27500        -6.02521
   0.00000      0.70000         1.00000         2.30000        -5.88695
   0.00000      0.70000         1.00000         2.32500        -5.75262
   0.00000      0.70000         1.00000         2.35000        -5.62203
   0.00000      0.70000         1.00000         2.37500        -5.49505
   0.00000      0.70000         1.00000         2.40000        -5.37152
   0.00000      0.70000         1.00000         2.42500        -5.25130
   0.00000      0.70000         1.00000         2.45000        -5.13428
   0.00000      0.70000         1.00000         2.47500        -5.02031
   0.00000      0.70000         1.00000         2.50000        -4.90930
   0.00000      0.70000         1.00000         2.52500        -4.80112
   0.00000      0.70000         1.00000         2.55000        -4.69566
   0.00000      0.70000         1.00000         2.57500        -4.59284
   0.00000      0.70000         1.00000         2.60000        -4.49255
   0.00000      0.70000         1.00000         2.62500        -4.39470
   0.00000      0.70000         1.00000         2.65000        -4.29921
   0.00000      0.70000         1.00000         2.67500        -4.20598
   0.00000      0.70000         1.00000         2.70000        -4.11495
   0.00000      0.70000         1.00000         2.72500        -4.02604
   0.00000      0.70000         1.00000         2.75000        -3.93917
   0.00000      0.70000         1.00000         2.77500        -3.85428
   0.00000      0.70000         1.00000         2.80000        -3.77130
   0.00000      0.70000         1.00000         2.82500        -3.69017
   0.00000      0.70000         1.00000         2.85000        -3.61082
   0.00000      0.70000         1.00000         2.87500        -3.53321
   0.00000      0.70000         1.00000         2.90000        -3.45727
   0.00000      0.70000         1.00000         2.92500        -3.38295
   0.00000      0.70000         1.00000         2.95000        -3.31021
   0.00000      0.70000         1.00000         2.97500        -3.23898
   0.00000      0.70000         1.00000         3.00000        -3.16924
   0.00000      0.70000         1.00000         3.02500        -3.10092
   0.00000      0.70000         1.00000         3.05000        -3.03400
   0.00000      0.70000         1.00000         3.07500        -2.96842
   0.00000      0.70000         1.00000         3.10000        -2.90415
   0.00000      0.70000         1.00000         3.12500        -2.84115
   0.00000      0.70000         1.00000         3.15000        -2.77938
   0.00000      0.70000         1.00000         3.17500        -2.71882
   0.00000      0.70000         1.00000         3.20000        -2.65941
   0.00000      0.70000         1.00000         3.22500        -2.60114
   0.00000      0.70000         1.00000         3.25000        -2.54397
   0.00000      0.70000         1.00000         3.27500        -2.48786
   0.00000      0.70000         1.00000         3.30000        -2.43280
   0.00000      0.70000         1.00000         3.32500        -2.37875
   0.00000      0.70000         1.00000         3.35000        -2.32568
   0.00000      0.70000         1.00000         3.37500        -2.27358
   0.00000      0.70000         1.00000         3.40000        -2.22241
   0.00000      0.70000         1.00000         3.42500        -2.17214
   0.00000      0.70000         1.00000         3.45000        -2.12276
   0.00000      0.70000         1.00000         3.47500        -2.07425
   0.00000      0.70000         1.00000         3.50000        -2.02658
   0.00000      0.70000         1.00000         3.52500        -1.97972
   0.00000      0.70000         1.00000         3.55000        -1.93367
   0.00000      0.70000         1.00000         3.57500        -1.88840
   0.00000      0.70000         1.00000         3.60000        -1.84388
   0.00000      0.70000         1.00000         3.62500        -1.80011
   0.00000      0.70000         1.00000         3.65000        -1.75706
   0.00000      0.70000         1.00000         3.67500        -1.71472
   0.00000      0.70000         1.00000         3.70000        -1.67306
   0.00000      0.70000         1.00000         3.72500        -1.63208
   0.00000      0.70000         1.00000         3.75000        -1.59176
   0.00000      0.70000         1.00000         3.77500        -1.55208
   0.00000      0.70000         1.00000         3.80000        -1.51302
   0.00000      0.70000         1.00000         3.82500        -1.47458
   0.00000      0.70000         1.00000         3.85000        -1.43674
   0.00000      0.70000         1.00000         3.87500        -1.39948
   0.00000      0.70000         1.00000         3.90000        -1.36280
   0.00000      0.70000         1.00000         3.92500        -1.32667
   0.00000      0.70000         1.00000         3.95000        -1.29109
   0.00000      0.70000         1.00000         3.97500        -1.25604
   0.00000      0.70000         1.00000         4.00000        -1.22152
   0.00000      0.70000         1.00000         4.02500        -1.18751
   0.00000      0.70000         1.00000         4.05000        -1.15400
   0.00000      0.70000         1.00000         4.07500        -1.12098
   0.00000      0.70000         1.00000         4.10000        -1.08844
   0.00000      0.70000         1.00000         4.12500        -1.05637
   0.00000      0.70000         1.00000         4.15000        -1.02476
   0.00000      0.70000         1.00000         4.17500        -0.99360
   0.00000      0.70000         1.00000         4.20000        -0.96288
   0.00000      0.70000         1.00000         4.22500        -0.93259
   0.00000      0.70000         1.00000         4.25000        -0.90273
   0.00000      0.70000         1.00000         4.27500        -0.87328
   0.00000      0.70000         1.00000         4.30000        -0.84423
   0.00000      0.70000         1.00000         4.32500        -0.81559
   0.00000      0.70000         1.00000         4.35000        -0.78733
   0.00000      0.70000         1.00000         4.37500        -0.75946
   0.00000      0.70000         1.00000         4.40000        -0.73196
   0.00000      0.70000         1.00000         4.42500        -0.70483
   0.00000      0.70000         1.00000         4.45000        -0.67806
   0.00000      0.70000         1.00000         4.47500        -0.65164
   0.00000      0.70000         1.00000         4.50000        -0.62557
   0.00000      0.70000         1.00000         4.52500        -0.59984
   0.00000      0.70000         1.00000         4.55000        -0.57444
   0.00000      0.70000         1.00000         4.57500        -0.54937
   0.00000      0.70000         1.00000         4.60000        -0.52463
   0.00000      0.70000         1.00000         4.62500        -0.50019
   0.00000      0.70000         1.00000         4.65000        -0.47607
   0.00000      0.70000         1.00000         4.67500        -0.45225
   0.00000      0.70000         1.00000         4.70000        -0.42873
   0.00000      0.70000         1.00000         4.72500        -0.40551
   0.00000      0.70000         1.00000         4.75000        -0.38257
   0.00000      0.70000         1.00000         4.77500        -0.35991
   0.00000      0.70000         1.00000         4.80000        -0.33753
   0.00000      0.70000         1.00000         4.82500        -0.31543
   0.00000      0.70000         1.00000         4.85000        -0.29359
   0.00000      0.70000         1.00000         4.87500        -0.27202
   0.00000      0.70000         1.00000         4.90000        -0.25070
   0.00000      0.70000         1.00000         4.92500        -0.22964
   0.00000      0.70000         1.00000         4.95000        -0.20883
   0.00000      0.70000         1.00000         4.97500        -0.18826
   0.00000      0.70000         1.00000         5.00000        -0.16793
   0.00000      0.70000         1.00000         5.02500        -0.14785
   0.00000      0.70000         1.00000         5.05000        -0.12799
   0.00000      0.70000         1.00000         5.07500        -0.10837
   0.00000      0.70000         1.00000         5.10000        -0.08897
   0.00000      0.70000         1.00000         5.12500        -0.06979
   0.00000      0.70000         1.00000         5.15000        -0.05083
   0.00000      0.70000         1.00000         5.17500        -0.03209
   0.00000      0.70000         1.00000         5.20000        -0.01355
   0.00000      0.70000         1.00000         5.22500         0.00477
   0.00000      0.70000         1.00000         5.25000         0.02290
   0.00000      0.70000         1.00000         5.27500         0.04082
   0.00000      0.70000         1.00000         5.30000         0.05854
   0.00000      0.70000         1.00000         5.32500         0.07607
   0.00000      0.70000         1.00000         5.35000         0.09340
   0.00000      0.70000         1.00000         5.37500         0.11055
   0.00000      0.70000         1.00000         5.40000         0.12751
   0.00000      0.70000         1.00000         5.42500         0.14429
   0.00000      0.70000         1.00000         5.45000         0.16089
   0.00000      0.70000         1.00000         5.47500         0.17731
   0.00000      0.70000         1.00000         5.50000         0.19356
   0.00000      0.70000         1.00000         5.52500         0.20963
   0.00000      0.70000         1.00000         5.55000         0.22554
   0.00000      0.70000         1.00000         5.57500         0.24128
   0.00000      0.70000         1.00000         5.60000         0.25686
   0.00000      0.70000         1.00000         5.62500         0.27227
   0.00000      0.70000         1.00000         5.65000         0.28752
   0.00000      0.70000         1.00000         5.67500         0.30262
   0.00000      0.70000         1.00000         5.70000         0.31756
   0.00000      0.70000         1.00000         5.72500         0.33235
   0.00000      0.70000         1.00000         5.75000         0.34699
   0.00000      0.70000         1.00000         5.77500         0.36148
   0.00000      0.70000         1.00000         5.80000         0.37583
   0.00000      0.70000         1.00000         5.82500         0.39003
   0.00000      0.70000         1.00000         5.85000         0.40409
   0.00000      0.70000         1.00000         5.87500         0.41801
   0.00000      0.70000         1.00000         5.90000         0.43180
   0.00000      0.70000         1.00000         5.92500         0.44544
   0.00000      0.70000         1.00000         5.95000         0.45896
   0.00000      0.70000         1.00000         5.97500         0.47234
   0.00000      0.70000         1.00000         6.00000         0.48559
   0.00000      0.70000         1.00000         6.02500         0.49871
   0.00000      0.70000         1.00000         6.05000         0.51171
   0.00000      0.70000         1.00000         6.07500         0.52458
   0.00000      0.70000         1.00000         6.10000         0.53733
   0.00000      0.70000         1.00000         6.12500         0.54996
   0.00000      0.70000         1.00000         6.15000         0.56247
   0.00000      0.70000         1.00000         6.17500         0.57486
   0.00000      0.70000         1.00000         6.20000         0.58713
   0.00000      0.70000         1.00000         6.22500         0.59929
   0.00000      0.70000         1.00000         6.25000         0.61133
   0.00000      0.70000         2.00000         0.55000      -311.21919
   0.00000      0.70000         2.00000         0.57500      -247.38634
   0.00000      0.70000         2.00000         0.60000      -201.61576
   0.00000      0.70000         2.00000         0.62500      -167.81101
   0.00000      0.70000         2.00000         0.65000      -142.19241
   0.00000      0.70000         2.00000         0.67500      -122.33530
   0.00000      0.70000         2.00000         0.70000      -106.63629
   0.00000      0.70000         2.00000         0.72500       -94.00606
   0.00000      0.70000         2.00000         0.75000       -83.68630
   0.00000      0.70000         2.00000         0.77500       -75.13751
   0.00000      0.70000         2.00000         0.80000       -67.96821
   0.00000      0.70000         2.00000         0.82500       -61.88921
   0.00000      0.70000         2.00000         0.85000       -56.68338
   0.00000      0.70000         2.00000         0.87500       -52.18525
   0.00000      0.70000         2.00000         0.90000       -48.26701
   0.00000      0.70000         2.00000         0.92500       -44.82871
   0.00000      0.70000         2.00000         0.95000       -41.79128
   0.00000      0.70000         2.00000         0.97500       -39.09150
   0.00000      0.70000         2.00000         1.00000       -36.67832
   0.00000      0.70000         2.00000         1.02500       -34.51019
   0.00000      0.70000         2.00000         1.05000       -32.55294
   0.00000      0.70000         2.00000         1.07500       -30.77831
   0.00000      0.70000         2.00000         1.10000       -29.16271
   0.00000      0.70000         2.00000         1.12500       -27.68636
   0.00000      0.70000         2.00000         1.15000       -26.33253
   0.00000      0.70000         2.00000         1.17500       -25.08701
   0.00000      0.70000         2.00000         1.20000       -23.93765
   0.00000      0.70000         2.00000         1.22500       -22.87400
   0.00000      0.70000         2.00000         1.25000       -21.88706
   0.00000      0.70000         2.00000         1.27500       -20.96902
   0.00000      0.70000         2.00000         1.30000       -20.11305
   0.00000      0.70000         2.00000         1.32500       -19.31321
   0.00000      0.70000         2.00000         1.35000       -18.56425
   0.00000      0.70000         2.00000         1.37500       -17.86157
   0.00000      0.70000         2.00000         1.40000       -17.20109
   0.00000      0.70000         2.00000         1.42500       -16.57919
   0.00000      0.70000         2.00000         1.45000       -15.99263
   0.00000      0.70000         2.00000         1.47500       -15.43854
   0.00000      0.70000         2.00000         1.50000       -14.91434
   0.00000      0.70000         2.00000         1.52500       -14.41771
   0.00000      0.70000         2.00000         1.55000       -13.94656
   0.00000      0.70000         2.00000         1.57500       -13.49902
   0.00000      0.70000         2.00000         1.60000       -13.07337
   0.00000      0.70000         2.00000         1.62500       -12.66806
   0.00000      0.70000         2.00000         1.65000       -12.28171
   0.00000      0.70000         2.00000         1.67500       -11.91301
   0.00000      0.70000         2.00000         1.70000       -11.56082
   0.00000      0.70000         2.00000         1.72500       -11.22404
   0.00000      0.70000         2.00000         1.75000       -10.90172
   0.00000      0.70000         2.00000         1.77500       -10.59294
   0.00000      0.70000         2.00000         1.80000       -10.29688
   0.00000      0.70000         2.00000         1.82500       -10.01279
   0.00000      0.70000         2.00000         1.85000        -9.73995
   0.00000      0.70000         2.00000         1.87500        -9.47773
   0.00000      0.70000         2.00000         1.90000        -9.22551
   0.00000      0.70000         2.00000         1.92500        -8.98275
   0.00000      0.70000         2.00000         1.95000        -8.74893
   0.00000      0.70000         2.00000         1.97500        -8.52356
   0.00000      0.70000         2.00000         2.00000        -8.30621
   0.00000      0.70000         2.00000         2.02500        -8.09646
   0.00000      0.70000         2.00000         2.05000        -7.89392
   0.00000      0.70000         2.00000         2.07500        -7.69823
   0.00000      0.70000         2.00000         2.10000        -7.50905
   0.00000      0.70000         2.00000         2.12500        -7.32607
   0.00000      0.70000         2.00000         2.15000        -7.14899
   0.00000      0.70000         2.00000         2.17500        -6.97753
   0.00000      0.70000         2.00000         2.20000        -6.81143
   0.00000      0.70000         2.00000         2.22500        -6.65045
   0.00000      0.70000         2.00000         2.25000        -6.49435
   0.00000      0.70000         2.00000         2.27500        -6.34293
   0.00000      0.70000         2.00000         2.30000        -6.19597
   0.00000      0.70000         2.00000         2.32500        -6.05328
   0.00000      0.70000         2.00000         2.35000        -5.91469
   0.00000      0.70000         2.00000         2.37500        -5.78002
   0.00000      0.70000         2.00000         2.40000        -5.64910
   0.00000      0.70000         2.00000         2.42500        -5.52180
   0.00000      0.70000         2.00000         2.45000        -5.39795
   0.00000      0.70000         2.00000         2.47500        -5.27742
   0.00000      0.70000         2.00000         2.50000        -5.16009
   0.00000      0.70000         2.00000         2.52500        -5.04583
   0.00000      0.70000         2.00000         2.55000        -4.93451
   0.00000      0.70000         2.00000         2.57500        -4.82604
   0.00000      0.70000         2.00000         2.60000        -4.72030
   0.00000      0.70000         2.00000         2.62500        -4.61720
   0.00000      0.70000         2.00000         2.65000        -4.51663
   0.00000      0.70000         2.00000         2.67500        -4.41851
   0.00000      0.70000         2.00000         2.70000        -4.32275
   0.00000      0.70000         2.00000         2.72500        -4.22927
   0.00000      0.70000         2.00000         2.75000        -4.13798
   0.00000      0.70000         2.00000         2.77500        -4.04881
   0.00000      0.70000         2.00000         2.80000        -3.96170
   0.00000      0.70000         2.00000         2.82500        -3.87656
   0.00000      0.70000         2.00000         2.85000        -3.79334
   0.00000      0.70000         2.00000         2.87500        -3.71197
   0.00000      0.70000         2.00000         2.90000        -3.63240
   0.00000      0.70000         2.00000         2.92500        -3.55456
   0.00000      0.70000         2.00000         2.95000        -3.47839
   0.00000      0.70000         2.00000         2.97500        -3.40386
   0.00000      0.70000         2.00000         3.00000        -3.33090
   0.00000      0.70000         2.00000         3.02500        -3.25946
   0.00000      0.70000         2.00000         3.05000        -3.18951
   0.00000      0.70000         2.00000         3.07500        -3.12099
   0.00000      0.70000         2.00000         3.10000        -3.05386
   0.00000      0.70000         2.00000         3.12500        -2.98809
   0.00000      0.70000         2.00000         3.15000        -2.92362
   0.00000      0.70000         2.00000         3.17500        -2.86043
   0.00000      0.70000         2.00000         3.20000        -2.79848
   0.00000      0.70000         2.00000         3.22500        -2.73772
   0.00000      0.70000         2.00000         3.25000        -2.67814
   0.00000      0.70000         2.00000         3.27500        -2.61969
   0.00000      0.70000         2.00000         3.30000        -2.56234
   0.00000      0.70000         2.00000         3.32500        -2.50606
   0.00000      0.70000         2.00000         3.35000        -2.45083
   0.00000      0.70000         2.00000         3.37500        -2.39661
   0.00000      0.70000         2.00000         3.40000        -2.34338
   0.00000      0.70000         2.00000         3.42500        -2.29111
   0.00000      0.70000         2.00000         3.45000        -2.23978
   0.00000      0.70000         2.00000         3.47500        -2.18936
   0.00000      0.70000         2.00000         3.50000        -2.13983
   0.00000      0.70000         2.00000         3.52500        -2.09116
   0.00000      0.70000         2.00000         3.55000        -2.04334
   0.00000      0.70000         2.00000         3.57500        -1.99634
   0.00000      0.70000         2.00000         3.60000        -1.95014
   0.00000      0.70000         2.00000         3.62500        -1.90472
   0.00000      0.70000         2.00000         3.65000        -1.86006
   0.00000      0.70000         2.00000         3.67500        -1.81615
   0.00000      0.70000         2.00000         3.70000        -1.77297
   0.00000      0.70000         2.00000         3.72500        -1.73049
   0.00000      0.70000         2.00000         3.75000        -1.68870
   0.00000      0.70000         2.00000         3.77500        -1.64759
   0.00000      0.70000         2.00000         3.80000        -1.60714
   0.00000      0.70000         2.00000         3.82500        -1.56733
   0.00000      0.70000         2.00000         3.85000        -1.52815
   0.00000      0.70000         2.00000         3.87500        -1.48959
   0.00000      0.70000         2.00000         3.90000        -1.45162
   0.00000      0.70000         2.00000         3.92500        -1.41424
   0.00000      0.70000         2.00000         3.95000        -1.37744
   0.00000      0.70000         2.00000         3.97500        -1.34120
   0.00000      0.70000         2.00000         4.00000        -1.30550
   0.00000      0.70000         2.00000         4.02500        -1.27034
   0.00000      0.70000         2.00000         4.05000        -1.23571
   0.00000      0.70000         2.00000         4.07500        -1.20159
   0.00000      0.70000         2.00000         4.10000        -1.16797
   0.00000      0.70000         2.00000         4.12500        -1.13484
   0.00000      0.70000         2.00000         4.15000        -1.10220
   0.00000      0.70000         2.00000         4.17500        -1.07002
   0.00000      0.70000         2.00000         4.20000        -1.03831
   0.00000      0.70000         2.00000         4.22500        -1.00705
   0.00000      0.70000         2.00000         4.25000        -0.97623
   0.00000      0.70000         2.00000         4.27500        -0.94584
   0.00000      0.70000         2.00000         4.30000        -0.91588
   0.00000      0.70000         2.00000         4.32500        -0.88633
   0.00000      0.70000         2.00000         4.35000        -0.85719
   0.00000      0.70000         2.00000         4.37500        -0.82845
   0.00000      0.70000         2.00000         4.40000        -0.80011
   0.00000      0.70000         2.00000         4.42500        -0.77214
   0.00000      0.70000         2.00000         4.45000        -0.74455
   0.00000      0.70000         2.00000         4.47500        -0.71733
   0.00000      0.70000         2.00000         4.50000        -0.69047
   0.00000      0.70000         2.00000         4.52500        -0.66397
   0.00000      0.70000         2.00000         4.55000        -0.63781
   0.00000      0.70000         2.00000         4.57500        -0.61200
   0.00000      0.70000         2.00000         4.60000        -0.58652
   0.00000      0.70000         2.00000         4.62500        -0.56137
   0.00000      0.70000         2.00000         4.65000        -0.53654
   0.00000      0.70000         2.00000         4.67500        -0.51203
   0.00000      0.70000         2.00000         4.70000        -0.48782
   0.00000      0.70000         2.00000         4.72500        -0.46393
   0.00000      0.70000         2.00000         4.75000        -0.44033
   0.00000      0.70000         2.00000         4.77500        -0.41703
   0.00000      0.70000         2.00000         4.80000        -0.39401
   0.00000      0.70000         2.00000         4.82500        -0.37128
   0.00000      0.70000         2.00000         4.85000        -0.34883
   0.00000      0.70000         2.00000         4.87500        -0.32665
   0.00000      0.70000         2.00000         4.90000        -0.30474
   0.00000      0.70000         2.00000         4.92500        -0.28309
   0.00000      0.70000         2.00000         4.95000        -0.26171
   0.00000      0.70000         2.00000         4.97500        -0.24057
   0.00000      0.70000         2.00000         5.00000        -0.21969
   0.00000      0.70000         2.00000         5.02500        -0.19906
   0.00000      0.70000         2.00000         5.05000        -0.17867
   0.00000      0.70000         2.00000         5.07500        -0.15851
   0.00000      0.70000         2.00000         5.10000        -0.13859
   0.00000      0.70000         2.00000         5.12500        -0.11890
   0.00000      0.70000         2.00000         5.15000        -0.09944
   0.00000      0.70000         2.00000         5.17500        -0.08019
   0.00000      0.70000         2.00000         5.20000        -0.06117
   0.00000      0.70000         2.00000         5.22500        -0.04236
   0.00000      0.70000         2.00000         5.25000        -0.02377
   0.00000      0.70000         2.00000         5.27500        -0.00538
   0.00000      0.70000         2.00000         5.30000         0.01280
   0.00000      0.70000         2.00000         5.32500         0.03078
   0.00000      0.70000         2.00000         5.35000         0.04856
   0.00000      0.70000         2.00000         5.37500         0.06615
   0.00000      0.70000         2.00000         5.40000         0.08354
   0.00000      0.70000         2.00000         5.42500         0.10075
   0.00000      0.70000         2.00000         5.45000         0.11777
   0.00000      0.70000         2.00000         5.47500         0.13460
   0.00000      0.70000         2.00000         5.50000         0.15125
   0.00000      0.70000         2.00000         5.52500         0.16773
   0.00000      0.70000         2.00000         5.55000         0.18403
   0.00000      0.70000         2.00000         5.57500         0.20016
   0.00000      0.70000         2.00000         5.60000         0.21612
   0.00000      0.70000         2.00000         5.62500         0.23191
   0.00000      0.70000         2.00000         5.65000         0.24754
   0.00000      0.70000         2.00000         5.67500         0.26301
   0.00000      0.70000         2.00000         5.70000         0.27831
   0.00000      0.70000         2.00000         5.72500         0.29346
   0.00000      0.70000         2.00000         5.75000         0.30845
   0.00000      0.70000         2.00000         5.77500         0.32329
   0.00000      0.70000         2.00000         5.80000         0.33798
   0.00000      0.70000         2.00000         5.82500         0.35252
   0.00000      0.70000         2.00000         5.85000         0.36691
   0.00000      0.70000         2.00000         5.87500         0.38116
   0.00000      0.70000         2.00000         5.90000         0.39527
   0.00000      0.70000         2.00000         5.92500         0.40924
   0.00000      0.70000         2.00000         5.95000         0.42307
   0.00000      0.70000         2.00000         5.97500         0.43676
   0.00000      0.70000         2.00000         6.00000         0.45032
   0.00000      0.70000         2.00000         6.02500         0.46375
   0.00000      0.70000         2.00000         6.05000         0.47704
   0.00000      0.70000         2.00000         6.07500         0.49021
   0.00000      0.70000         2.00000         6.10000         0.50325
   0.00000      0.70000         2.00000         6.12500         0.51617
   0.00000      0.70000         2.00000         6.15000         0.52896
   0.00000      0.70000         2.00000         6.17500         0.54163
   0.00000      0.70000         2.00000         6.20000         0.55418
   0.00000      0.70000         2.00000         6.22500         0.56661
   0.00000      0.70000         2.00000         6.25000         0.57892
   0.00000      0.70000         2.00000         6.27500         0.59112
   0.00000      0.70000         2.00000         6.30000         0.60321
   0.00000      0.70000         2.00000         6.32500         0.61518
   0.00000      0.70000         2.00000         6.35000         0.62704
   0.00000      0.70000         2.00000         6.37500         0.63879
   0.00000      0.70000         3.00000         0.62500      -271.29911
   0.00000      0.70000         3.00000         0.65000      -220.83289
   0.00000      0.70000         3.00000         0.67500      -183.44314
   0.00000      0.70000         3.00000         0.70000      -155.06381
   0.00000      0.70000         3.00000         0.72500      -133.05834
   0.00000      0.70000         3.00000         0.75000      -115.66878
   0.00000      0.70000         3.00000         0.77500      -101.69327
   0.00000      0.70000         3.00000         0.80000       -90.29123
   0.00000      0.70000         3.00000         0.82500       -80.86259
   0.00000      0.70000         3.00000         0.85000       -72.97088
   0.00000      0.70000         3.00000         0.87500       -66.29317
   0.00000      0.70000         3.00000         0.90000       -60.58678
   0.00000      0.70000         3.00000         0.92500       -55.66670
   0.00000      0.70000         3.00000         0.95000       -51.39005
   0.00000      0.70000         3.00000         0.97500       -47.64512
   0.00000      0.70000         3.00000         1.00000       -44.34359
   0.00000      0.70000         3.00000         1.02500       -41.41492
   0.00000      0.70000         3.00000         1.05000       -38.80223
   0.00000      0.70000         3.00000         1.07500       -36.45921
   0.00000      0.70000         3.00000         1.10000       -34.34790
   0.00000      0.70000         3.00000         1.12500       -32.43689
   0.00000      0.70000         3.00000         1.15000       -30.70004
   0.00000      0.70000         3.00000         1.17500       -29.11541
   0.00000      0.70000         3.00000         1.20000       -27.66452
   0.00000      0.70000         3.00000         1.22500       -26.33166
   0.00000      0.70000         3.00000         1.25000       -25.10344
   0.00000      0.70000         3.00000         1.27500       -23.96836
   0.00000      0.70000         3.00000         1.30000       -22.91650
   0.00000      0.70000         3.00000         1.32500       -21.93928
   0.00000      0.70000         3.00000         1.35000       -21.02924
   0.00000      0.70000         3.00000         1.37500       -20.17984
   0.00000      0.70000         3.00000         1.40000       -19.38536
   0.00000      0.70000         3.00000         1.42500       -18.64076
   0.00000      0.70000         3.00000         1.45000       -17.94159
   0.00000      0.70000         3.00000         1.47500       -17.28389
   0.00000      0.70000         3.00000         1.50000       -16.66417
   0.00000      0.70000         3.00000         1.52500       -16.07929
   0.00000      0.70000         3.00000         1.55000       -15.52644
   0.00000      0.70000         3.00000         1.57500       -15.00311
   0.00000      0.70000         3.00000         1.60000       -14.50704
   0.00000      0.70000         3.00000         1.62500       -14.03619
   0.00000      0.70000         3.00000         1.65000       -13.58872
   0.00000      0.70000         3.00000         1.67500       -13.16295
   0.00000      0.70000         3.00000         1.70000       -12.75737
   0.00000      0.70000         3.00000         1.72500       -12.37060
   0.00000      0.70000         3.00000         1.75000       -12.00138
   0.00000      0.70000         3.00000         1.77500       -11.64856
   0.00000      0.70000         3.00000         1.80000       -11.31109
   0.00000      0.70000         3.00000         1.82500       -10.98800
   0.00000      0.70000         3.00000         1.85000       -10.67840
   0.00000      0.70000         3.00000         1.87500       -10.38147
   0.00000      0.70000         3.00000         1.90000       -10.09647
   0.00000      0.70000         3.00000         1.92500        -9.82270
   0.00000      0.70000         3.00000         1.95000        -9.55952
   0.00000      0.70000         3.00000         1.97500        -9.30634
   0.00000      0.70000         3.00000         2.00000        -9.06259
   0.00000      0.70000         3.00000         2.02500        -8.82778
   0.00000      0.70000         3.00000         2.05000        -8.60142
   0.00000      0.70000         3.00000         2.07500        -8.38308
   0.00000      0.70000         3.00000         2.10000        -8.17233
   0.00000      0.70000         3.00000         2.12500        -7.96880
   0.00000      0.70000         3.00000         2.15000        -7.77212
   0.00000      0.70000         3.00000         2.17500        -7.58197
   0.00000      0.70000         3.00000         2.20000        -7.39801
   0.00000      0.70000         3.00000         2.22500        -7.21997
   0.00000      0.70000         3.00000         2.25000        -7.04756
   0.00000      0.70000         3.00000         2.27500        -6.88052
   0.00000      0.70000         3.00000         2.30000        -6.71862
   0.00000      0.70000         3.00000         2.32500        -6.56161
   0.00000      0.70000         3.00000         2.35000        -6.40928
   0.00000      0.70000         3.00000         2.37500        -6.26144
   0.00000      0.70000         3.00000         2.40000        -6.11788
   0.00000      0.70000         3.00000         2.42500        -5.97843
   0.00000      0.70000         3.00000         2.45000        -5.84291
   0.00000      0.70000         3.00000         2.47500        -5.71116
   0.00000      0.70000         3.00000         2.50000        -5.58304
   0.00000      0.70000         3.00000         2.52500        -5.45838
   0.00000      0.70000         3.00000         2.55000        -5.33707
   0.00000      0.70000         3.00000         2.57500        -5.21896
   0.00000      0.70000         3.00000         2.60000        -5.10393
   0.00000      0.70000         3.00000         2.62500        -4.99187
   0.00000      0.70000         3.00000         2.65000        -4.88267
   0.00000      0.70000         3.00000         2.67500        -4.77621
   0.00000      0.70000         3.00000         2.70000        -4.67239
   0.00000      0.70000         3.00000         2.72500        -4.57113
   0.00000      0.70000         3.00000         2.75000        -4.47233
   0.00000      0.70000         3.00000         2.77500        -4.37589
   0.00000      0.70000         3.00000         2.80000        -4.28175
   0.00000      0.70000         3.00000         2.82500        -4.18982
   0.00000      0.70000         3.00000         2.85000        -4.10002
   0.00000      0.70000         3.00000         2.87500        -4.01228
   0.00000      0.70000         3.00000         2.90000        -3.92653
   0.00000      0.70000         3.00000         2.92500        -3.84271
   0.00000      0.70000         3.00000         2.95000        -3.76076
   0.00000      0.70000         3.00000         2.97500        -3.68060
   0.00000      0.70000         3.00000         3.00000        -3.60219
   0.00000      0.70000         3.00000         3.02500        -3.52547
   0.00000      0.70000         3.00000         3.05000        -3.45039
   0.00000      0.70000         3.00000         3.07500        -3.37689
   0.00000      0.70000         3.00000         3.10000        -3.30493
   0.00000      0.70000         3.00000         3.12500        -3.23446
   0.00000      0.70000         3.00000         3.15000        -3.16543
   0.00000      0.70000         3.00000         3.17500        -3.09780
   0.00000      0.70000         3.00000         3.20000        -3.03153
   0.00000      0.70000         3.00000         3.22500        -2.96659
   0.00000      0.70000         3.00000         3.25000        -2.90292
   0.00000      0.70000         3.00000         3.27500        -2.84050
   0.00000      0.70000         3.00000         3.30000        -2.77929
   0.00000      0.70000         3.00000         3.32500        -2.71926
   0.00000      0.70000         3.00000         3.35000        -2.66036
   0.00000      0.70000         3.00000         3.37500        -2.60258
   0.00000      0.70000         3.00000         3.40000        -2.54588
   0.00000      0.70000         3.00000         3.42500        -2.49023
   0.00000      0.70000         3.00000         3.45000        -2.43560
   0.00000      0.70000         3.00000         3.47500        -2.38196
   0.00000      0.70000         3.00000         3.50000        -2.32929
   0.00000      0.70000         3.00000         3.52500        -2.27757
   0.00000      0.70000         3.00000         3.55000        -2.22677
   0.00000      0.70000         3.00000         3.57500        -2.17686
   0.00000      0.70000         3.00000         3.60000        -2.12782
   0.00000      0.70000         3.00000         3.62500        -2.07963
   0.00000      0.70000         3.00000         3.65000        -2.03227
   0.00000      0.70000         3.00000         3.67500        -1.98571
   0.00000      0.70000         3.00000         3.70000        -1.93995
   0.00000      0.70000         3.00000         3.72500        -1.89495
   0.00000      0.70000         3.00000         3.75000        -1.85070
   0.00000      0.70000         3.00000         3.77500        -1.80718
   0.00000      0.70000         3.00000         3.80000        -1.76438
   0.00000      0.70000         3.00000         3.82500        -1.72227
   0.00000      0.70000         3.00000         3.85000        -1.68084
   0.00000      0.70000         3.00000         3.87500        -1.64008
   0.00000      0.70000         3.00000         3.90000        -1.59997
   0.00000      0.70000         3.00000         3.92500        -1.56049
   0.00000      0.70000         3.00000         3.95000        -1.52162
   0.00000      0.70000         3.00000         3.97500        -1.48337
   0.00000      0.70000         3.00000         4.00000        -1.44570
   0.00000      0.70000         3.00000         4.02500        -1.40861
   0.00000      0.70000         3.00000         4.05000        -1.37209
   0.00000      0.70000         3.00000         4.07500        -1.33612
   0.00000      0.70000         3.00000         4.10000        -1.30069
   0.00000      0.70000         3.00000         4.12500        -1.26579
   0.00000      0.70000         3.00000         4.15000        -1.23141
   0.00000      0.70000         3.00000         4.17500        -1.19753
   0.00000      0.70000         3.00000         4.20000        -1.16415
   0.00000      0.70000         3.00000         4.22500        -1.13125
   0.00000      0.70000         3.00000         4.25000        -1.09883
   0.00000      0.70000         3.00000         4.27500        -1.06687
   0.00000      0.70000         3.00000         4.30000        -1.03537
   0.00000      0.70000         3.00000         4.32500        -1.00431
   0.00000      0.70000         3.00000         4.35000        -0.97369
   0.00000      0.70000         3.00000         4.37500        -0.94349
   0.00000      0.70000         3.00000         4.40000        -0.91372
   0.00000      0.70000         3.00000         4.42500        -0.88436
   0.00000      0.70000         3.00000         4.45000        -0.85540
   0.00000      0.70000         3.00000         4.47500        -0.82683
   0.00000      0.70000         3.00000         4.50000        -0.79865
   0.00000      0.70000         3.00000         4.52500        -0.77085
   0.00000      0.70000         3.00000         4.55000        -0.74342
   0.00000      0.70000         3.00000         4.57500        -0.71635
   0.00000      0.70000         3.00000         4.60000        -0.68964
   0.00000      0.70000         3.00000         4.62500        -0.66329
   0.00000      0.70000         3.00000         4.65000        -0.63727
   0.00000      0.70000         3.00000         4.67500        -0.61160
   0.00000      0.70000         3.00000         4.70000        -0.58625
   0.00000      0.70000         3.00000         4.72500        -0.56123
   0.00000      0.70000         3.00000         4.75000        -0.53653
   0.00000      0.70000         3.00000         4.77500        -0.51215
   0.00000      0.70000         3.00000         4.80000        -0.48807
   0.00000      0.70000         3.00000         4.82500        -0.46429
   0.00000      0.70000         3.00000         4.85000        -0.44081
   0.00000      0.70000         3.00000         4.87500        -0.41762
   0.00000      0.70000         3.00000         4.90000        -0.39471
   0.00000      0.70000         3.00000         4.92500        -0.37209
   0.00000      0.70000         3.00000         4.95000        -0.34974
   0.00000      0.70000         3.00000         4.97500        -0.32766
   0.00000      0.70000         3.00000         5.00000        -0.30585
   0.00000      0.70000         3.00000         5.02500        -0.28430
   0.00000      0.70000         3.00000         5.05000        -0.26300
   0.00000      0.70000         3.00000         5.07500        -0.24196
   0.00000      0.70000         3.00000         5.10000        -0.22117
   0.00000      0.70000         3.00000         5.12500        -0.20062
   0.00000      0.70000         3.00000         5.15000        -0.18031
   0.00000      0.70000         3.00000         5.17500        -0.16024
   0.00000      0.70000         3.00000         5.20000        -0.14040
   0.00000      0.70000         3.00000         5.22500        -0.12079
   0.00000      0.70000         3.00000         5.25000        -0.10140
   0.00000      0.70000         3.00000         5.27500        -0.08223
   0.00000      0.70000         3.00000         5.30000        -0.06328
   0.00000      0.70000         3.00000         5.32500        -0.04455
   0.00000      0.70000         3.00000         5.35000        -0.02602
   0.00000      0.70000         3.00000         5.37500        -0.00770
   0.00000      0.70000         3.00000         5.40000         0.01042
   0.00000      0.70000         3.00000         5.42500         0.02833
   0.00000      0.70000         3.00000         5.45000         0.04605
   0.00000      0.70000         3.00000         5.47500         0.06358
   0.00000      0.70000         3.00000         5.50000         0.08091
   0.00000      0.70000         3.00000         5.52500         0.09806
   0.00000      0.70000         3.00000         5.55000         0.11502
   0.00000      0.70000         3.00000         5.57500         0.13180
   0.00000      0.70000         3.00000         5.60000         0.14840
   0.00000      0.70000         3.00000         5.62500         0.16483
   0.00000      0.70000         3.00000         5.65000         0.18108
   0.00000      0.70000         3.00000         5.67500         0.19716
   0.00000      0.70000         3.00000         5.70000         0.21307
   0.00000      0.70000         3.00000         5.72500         0.22882
   0.00000      0.70000         3.00000         5.75000         0.24440
   0.00000      0.70000         3.00000         5.77500         0.25982
   0.00000      0.70000         3.00000         5.80000         0.27508
   0.00000      0.70000         3.00000         5.82500         0.29019
   0.00000      0.70000         3.00000         5.85000         0.30514
   0.00000      0.70000         3.00000         5.87500         0.31994
   0.00000      0.70000         3.00000         5.90000         0.33459
   0.00000      0.70000         3.00000         5.92500         0.34909
   0.00000      0.70000         3.00000         5.95000         0.36345
   0.00000      0.70000         3.00000         5.97500         0.37766
   0.00000      0.70000         3.00000         6.00000         0.39173
   0.00000      0.70000         3.00000         6.02500         0.40566
   0.00000      0.70000         3.00000         6.05000         0.41946
   0.00000      0.70000         3.00000         6.07500         0.43312
   0.00000      0.70000         3.00000         6.10000         0.44665
   0.00000      0.70000         3.00000         6.12500         0.46004
   0.00000      0.70000         3.00000         6.15000         0.47331
   0.00000      0.70000         3.00000         6.17500         0.48645
   0.00000      0.70000         3.00000         6.20000         0.49946
   0.00000      0.70000         3.00000         6.22500         0.51235
   0.00000      0.70000         3.00000         6.25000         0.52511
   0.00000      0.70000         3.00000         6.27500         0.53775
   0.00000      0.70000         3.00000         6.30000         0.55028
   0.00000      0.70000         3.00000         6.32500         0.56268
   0.00000      0.70000         3.00000         6.35000         0.57497
   0.00000      0.70000         3.00000         6.37500         0.58715
   0.00000      0.70000         3.00000         6.40000         0.59921
   0.00000      0.70000         3.00000         6.42500         0.61116
   0.00000      0.70000         3.00000         6.45000         0.62300
   0.00000      0.70000         3.00000         6.47500         0.63473
   0.00000      0.70000         3.00000         6.50000         0.64636
   0.00000      0.70000         3.00000         6.52500         0.65787
   0.00000      0.70000         4.00000         0.70000      -257.10369
   0.00000      0.70000         4.00000         0.72500      -212.76032
   0.00000      0.70000         4.00000         0.75000      -179.08983
   0.00000      0.70000         4.00000         0.77500      -153.00142
   0.00000      0.70000         4.00000         0.80000      -132.41870
   0.00000      0.70000         4.00000         0.82500      -115.91394
   0.00000      0.70000         4.00000         0.85000      -102.48449
   0.00000      0.70000         4.00000         0.87500       -91.41243
   0.00000      0.70000         4.00000         0.90000       -82.17463
   0.00000      0.70000         4.00000         0.92500       -74.38359
   0.00000      0.70000         4.00000         0.95000       -67.74804
   0.00000      0.70000         4.00000         0.97500       -62.04596
   0.00000      0.70000         4.00000         1.00000       -57.10600
   0.00000      0.70000         4.00000         1.02500       -52.79432
   0.00000      0.70000         4.00000         1.05000       -49.00525
   0.00000      0.70000         4.00000         1.07500       -45.65451
   0.00000      0.70000         4.00000         1.10000       -42.67427
   0.00000      0.70000         4.00000         1.12500       -40.00942
   0.00000      0.70000         4.00000         1.15000       -37.61484
   0.00000      0.70000         4.00000         1.17500       -35.45330
   0.00000      0.70000         4.00000         1.20000       -33.49386
   0.00000      0.70000         4.00000         1.22500       -31.71064
   0.00000      0.70000         4.00000         1.25000       -30.08185
   0.00000      0.70000         4.00000         1.27500       -28.58903
[truncated: 7,459,045 more chars]
