# Supplementary material for: The second virial coefficient of the dipolar two center Lennard-Jones modelElectronic supplementary information (ESI) available: computer programs and ancillary data. See http://www.rsc.org/suppdata/cp/b2/b200781a/
Source: Royal Society of Chemistry journal article supplement (doi:10.1039/b200781a), 2002-05-17
Supplement: t_boyle.dat [file t_boyle.dat]

#Angle   L*         mu*^2            Tb*
0   1.000000      0.0000000E+00   3.978829    
0   1.000000       1.000000       3.996197    
0   1.000000       2.000000       4.046457    
0   1.000000       3.000000       4.127656    
0   1.000000       4.000000       4.236974    
0   1.000000       6.000000       4.526716    
0   1.000000       8.000000       4.890758    
0   1.000000       10.00000       5.308990    
0  0.9000000      0.0000000E+00   4.291224    
0  0.9000000       1.000000       4.309927    
0  0.9000000       2.000000       4.364041    
0  0.9000000       3.000000       4.451390    
0  0.9000000       4.000000       4.568988    
0  0.9000000       6.000000       4.880555    
0  0.9000000       8.000000       5.271666    
0  0.9000000       10.00000       5.720747    
0  0.8000000      0.0000000E+00   4.688369    
0  0.8000000       1.000000       4.708654    
0  0.8000000       2.000000       4.767284    
0  0.8000000       3.000000       4.861971    
0  0.8000000       4.000000       4.989379    
0  0.8000000       6.000000       5.326994    
0  0.8000000       8.000000       5.750905    
0  0.8000000       10.00000       6.237713    
0  0.7000000      0.0000000E+00   5.196352    
0  0.7000000       1.000000       5.218491    
0  0.7000000       2.000000       5.282398    
0  0.7000000       3.000000       5.385623    
0  0.7000000       4.000000       5.524544    
0  0.7000000       6.000000       5.893137    
0  0.7000000       8.000000       6.356382    
0  0.7000000       10.00000       6.888804    
0  0.6000000      0.0000000E+00   5.851762    
0  0.6000000       1.000000       5.876037    
0  0.6000000       2.000000       5.946114    
0  0.6000000       3.000000       6.059340    
0  0.6000000       4.000000       6.211871    
0  0.6000000       6.000000       6.617131    
0  0.6000000       8.000000       7.127542    
0  0.6000000       10.00000       7.715261    
0  0.5000000      0.0000000E+00   6.705107    
0  0.5000000       1.000000       6.731920    
0  0.5000000       2.000000       6.809205    
0  0.5000000       3.000000       6.934173    
0  0.5000000       4.000000       7.102765    
0  0.5000000       6.000000       7.551809    
0  0.5000000       8.000000       8.119190    
0  0.5000000       10.00000       8.774183    
0  0.4000000      0.0000000E+00   7.821842    
0  0.4000000       1.000000       7.851635    
0  0.4000000       2.000000       7.937500    
0  0.4000000       3.000000       8.076437    
0  0.4000000       4.000000       8.323671    
0  0.4000000       4.000000       8.264242    
0  0.4000000       6.000000       8.765982    
0  0.4000000       8.000000       9.402541    
0  0.4000000       10.00000       10.14005    
0  0.3000000      0.0000000E+00   9.269243    
0  0.3000000       1.000000       9.302589    
0  0.3000000       2.000000       9.398626    
0  0.3000000       3.000000       9.554317    
0  0.3000000       4.000000       9.765098    
0  0.3000000       6.000000       10.33039    
0  0.3000000       8.000000       11.05103    
0  0.3000000       10.00000       11.88960    
0  0.2000000      0.0000000E+00   11.04350    
0  0.2000000       1.000000       11.08103    
0  0.2000000       2.000000       11.18894    
0  0.2000000       3.000000       11.36409    
0  0.2000000       4.000000       11.60174    
0  0.2000000       6.000000       12.24146    
0  0.2000000       8.000000       13.06115    
30   1.000000      0.0000000E+00   3.979365    
30   1.000000       1.000000       4.001915    
30   1.000000       2.000000       4.067575    
30   1.000000       3.000000       4.173116    
30   1.000000       4.000000       4.314330    
30   1.000000       6.000000       4.684783    
30   1.000000       8.000000       5.145337    
30   1.000000       10.00000       5.671846    
30  0.9000000      0.0000000E+00   4.291794    
30  0.9000000       1.000000       4.314950    
30  0.9000000       2.000000       4.382214    
30  0.9000000       3.000000       4.490421    
30  0.9000000       4.000000       4.635107    
30  0.9000000       6.000000       5.014497    
30  0.9000000       8.000000       5.485102    
30  0.9000000       10.00000       6.020911    
30  0.8000000      0.0000000E+00   4.689004    
30  0.8000000       1.000000       4.713102    
30  0.8000000       2.000000       4.783098    
30  0.8000000       3.000000       4.895762    
30  0.8000000       4.000000       5.046598    
30  0.8000000       6.000000       5.442729    
30  0.8000000       8.000000       5.934799    
30  0.8000000       10.00000       6.495332    
30  0.7000000      0.0000000E+00   5.197047    
30  0.7000000       1.000000       5.222425    
30  0.7000000       2.000000       5.296145    
30  0.7000000       3.000000       5.414967    
30  0.7000000       4.000000       5.574224    
30  0.7000000       6.000000       5.993650    
30  0.7000000       8.000000       6.516178    
30  0.7000000       10.00000       7.112679    
30  0.6000000      0.0000000E+00   5.852555    
30  0.6000000       1.000000       5.879575    
30  0.6000000       2.000000       5.958027    
30  0.6000000       3.000000       6.084625    
30  0.6000000       4.000000       6.254702    
30  0.6000000       6.000000       6.704047    
30  0.6000000       8.000000       7.288362    
30  0.6000000       8.000000       7.266122    
30  0.6000000       10.00000       7.909735    
30  0.5000000      0.0000000E+00   6.705999    
30  0.5000000       1.000000       6.735027    
30  0.5000000       2.000000       6.819318    
30  0.5000000       3.000000       6.955580    
30  0.5000000       4.000000       7.139060    
30  0.5000000       6.000000       7.625744    
30  0.5000000       8.000000       8.237548    
30  0.5000000       10.00000       8.940891    
30  0.4000000      0.0000000E+00   7.822845    
30  0.4000000       1.000000       7.854364    
30  0.4000000       2.000000       7.945789    
30  0.4000000       3.000000       8.093862    
30  0.4000000       4.000000       8.354544    
30  0.4000000       4.000000       8.293757    
30  0.4000000       6.000000       8.866954    
30  0.4000000       6.000000       8.826480    
30  0.4000000       8.000000       9.499905    
30  0.4000000       10.00000       10.27789    
30  0.3000000      0.0000000E+00   9.270411    
30  0.3000000       1.000000       9.304854    
30  0.3000000       2.000000       9.404943    
30  0.3000000       3.000000       9.567329    
30  0.3000000       4.000000       9.787131    
30  0.3000000       6.000000       10.37571    
30  0.3000000       8.000000       11.12453    
30  0.3000000       10.00000       11.99428    
30  0.2000000      0.0000000E+00   11.04482    
30  0.2000000       1.000000       11.08280    
30  0.2000000       2.000000       11.19298    
30  0.2000000       3.000000       11.37200    
30  0.2000000       4.000000       11.61499    
30  0.2000000       6.000000       12.26879    
30  0.2000000       8.000000       13.10582    
30  0.2000000       10.00000       14.08350    
60   1.000000      0.0000000E+00   3.979365    
60   1.000000       1.000000       4.010531    
60   1.000000       2.000000       4.101673    
60   1.000000       3.000000       4.248563    
60   1.000000       4.000000       4.445521    
60   1.000000       6.000000       4.968555    
60   1.000000       8.000000       5.641505    
60   1.000000       10.00000       6.454242    
60  0.9000000      0.0000000E+00   4.291794    
60  0.9000000       1.000000       4.322533    
60  0.9000000       2.000000       4.412416    
60  0.9000000       3.000000       4.556612    
60  0.9000000       4.000000       4.748724    
60  0.9000000       6.000000       5.250276    
60  0.9000000       8.000000       5.871792    
60  0.9000000       10.00000       6.583247    
60  0.8000000      0.0000000E+00   4.689004    
60  0.8000000       1.000000       4.719898    
60  0.8000000       2.000000       4.810179    
60  0.8000000       3.000000       4.955031    
60  0.8000000       4.000000       5.147974    
60  0.8000000       6.000000       5.650743    
60  0.8000000       8.000000       6.270579    
60  0.8000000       10.00000       6.974060    
60  0.7000000      0.0000000E+00   5.197047    
60  0.7000000       1.000000       5.228503    
60  0.7000000       2.000000       5.320432    
60  0.7000000       3.000000       5.468158    
60  0.7000000       4.000000       5.665257    
60  0.7000000       6.000000       6.179940    
60  0.7000000       8.000000       6.815515    
60  0.7000000       10.00000       7.536837    
60  0.6000000      0.0000000E+00   5.852555    
60  0.6000000       1.000000       5.884914    
60  0.6000000       2.000000       5.979505    
60  0.6000000       3.000000       6.131877    
60  0.6000000       4.000000       6.335711    
60  0.6000000       6.000000       6.870219    
60  0.6000000       8.000000       7.533121    
60  0.6000000       10.00000       8.287599    
60  0.5000000      0.0000000E+00   6.705999    
60  0.5000000       1.000000       6.739559    
60  0.5000000       2.000000       6.837812    
60  0.5000000       3.000000       6.996464    
60  0.5000000       4.000000       7.209429    
60  0.5000000       6.000000       7.770853    
60  0.5000000       8.000000       8.471412    
60  0.5000000       10.00000       9.272323    
60  0.4000000      0.0000000E+00   7.822845    
60  0.4000000       1.000000       7.857957    
60  0.4000000       2.000000       7.960863    
60  0.4000000       3.000000       8.127458    
60  0.4000000       4.000000       8.351903    
60  0.4000000       6.000000       8.947355    
60  0.4000000       8.000000       9.695860    
60  0.4000000       10.00000       10.55662    
60  0.3000000      0.0000000E+00   9.270377    
60  0.3000000       1.000000       9.307391    
60  0.3000000       2.000000       9.415913    
60  0.3000000       3.000000       9.592155    
60  0.3000000       4.000000       9.830492    
60  0.3000000       6.000000       10.46702    
60  0.3000000       8.000000       11.27375    
60  0.3000000       10.00000       12.20784    
60  0.2000000      0.0000000E+00   11.04482    
60  0.2000000       1.000000       11.08402    
60  0.2000000       2.000000       11.19900    
60  0.2000000       3.000000       11.38625    
60  0.2000000       4.000000       11.64038    
60  0.2000000       6.000000       12.32352    
60  0.2000000       8.000000       13.19654    
60  0.2000000       10.00000       14.21467    
90   1.000000      0.0000000E+00   3.979365    
90   1.000000       1.000000       4.013857    
90   1.000000       2.000000       4.115335    
90   1.000000       3.000000       4.279849    
90   1.000000       4.000000       4.502643    
90   1.000000       6.000000       5.109825    
90   1.000000       8.000000       5.929301    
90   1.000000       10.00000       6.958758    
90  0.9000000      0.0000000E+00   4.291794    
90  0.9000000       1.000000       4.325629    
90  0.9000000       2.000000       4.424935    
90  0.9000000       3.000000       4.584649    
90  0.9000000       4.000000       4.797856    
90  0.9000000       6.000000       5.357409    
90  0.9000000       8.000000       6.057633    
90  0.9000000       10.00000       6.870108    
90  0.8000000      0.0000000E+00   4.689004    
90  0.8000000       1.000000       4.722813    
90  0.8000000       2.000000       4.821968    
90  0.8000000       3.000000       4.981137    
90  0.8000000       4.000000       5.193115    
90  0.8000000       6.000000       5.745607    
90  0.8000000       8.000000       6.427723    
90  0.8000000       10.00000       7.204062    
90  0.7000000      0.0000000E+00   5.197047    
90  0.7000000       1.000000       5.231257    
90  0.7000000       2.000000       5.331522    
90  0.7000000       3.000000       5.492589    
90  0.7000000       4.000000       5.707276    
90  0.7000000       6.000000       6.267116    
90  0.7000000       8.000000       6.957596    
90  0.7000000       10.00000       7.741155    
90  0.6000000      0.0000000E+00   5.852555    
90  0.6000000       1.000000       5.887440    
90  0.6000000       2.000000       5.989734    
90  0.6000000       3.000000       6.154408    
90  0.6000000       4.000000       6.374424    
90  0.6000000       6.000000       6.950235    
90  0.6000000       8.000000       7.662829    
90  0.6000000       10.00000       8.473156    
90  0.5000000      0.0000000E+00   6.705999    
90  0.5000000       1.000000       6.741770    
90  0.5000000       2.000000       6.846883    
90  0.5000000       3.000000       7.016570    
90  0.5000000       4.000000       7.244032    
90  0.5000000       6.000000       7.842495    
90  0.5000000       8.000000       8.587452    
90  0.5000000       10.00000       9.437791    
90  0.4000000      0.0000000E+00   7.822845    
90  0.4000000       1.000000       7.859787    
90  0.4000000       2.000000       7.968416    
90  0.4000000       3.000000       8.144308    
90  0.4000000       4.000000       8.381062    
90  0.4000000       6.000000       9.008065    
90  0.4000000       8.000000       9.794477    
90  0.4000000       10.00000       10.69736    
90  0.3000000      0.0000000E+00   9.270377    
90  0.3000000       1.000000       9.308643    
90  0.3000000       2.000000       9.421446    
90  0.3000000       3.000000       9.604691    
90  0.3000000       4.000000       9.852382    
90  0.3000000       6.000000       10.51315    
90  0.3000000       8.000000       11.34922    
90  0.3000000       10.00000       12.31602    
90  0.2000000      0.0000000E+00   11.04482    
90  0.2000000       1.000000       11.08462    
90  0.2000000       2.000000       11.20205    
90  0.2000000       3.000000       11.39344    
90  0.2000000       4.000000       11.65319    
90  0.2000000       6.000000       12.35103    
90  0.2000000       8.000000       13.24218    
90  0.2000000       10.00000       14.28064    
